# Supplementary material for: Reactivity of frustrated Lewis pairs with BOC protected diazocarboxylates: FLP capture of diazene
Source: Royal Society of Chemistry journal article supplement (doi:10.1039/d3cc01571h), 2023-01-01
Supplement: d3cc01571h1.pdf [file d3cc01571h1.pdf]

## Electronic Supplementary Information

### Reactivity of Frustrated Lewis Pairs with BOC protected diazocarboxylates: FLP Capture of Diazene

Zahid Hussain,<sup>a</sup> Yong-an Luo,<sup>a</sup> Yile Wu,<sup>\*a</sup> Zheng-Wang Qu,<sup>\*c</sup> Stefan Grimme,<sup>c</sup> and Douglas W. Stephan<sup>\*ab</sup>

<sup>a</sup> Institute of Drug Discovery Technology, Ningbo University, Ningbo 315211, Zhejiang, China, Email: wuyile@nbu.edu.cn

<sup>b</sup> Department of Chemistry, University of Toronto, 80 St. George Street, Toronto, Ontario M5S 3H6, Canada, Email: [dstephan@chem.utoronto.ca](mailto:dstephan@chem.utoronto.ca)

<sup>c</sup> Mulliken Center for Theoretical Chemistry, Clausius Institut für Physikalische und Theoretische Chemie, Rheinische Friedrich-Wilhelms-Universität Bonn, Beringstrasse 4, 53115 Bonn, Germany, Email: qu@thch.uni-bonn.de

## Table of Contents

|                                                      |    |
|------------------------------------------------------|----|
| Experimental .....                                   | 3  |
| General information for synthesis .....              | 3  |
| Synthetic procedures and characterization data ..... | 4  |
| General procedure .....                              | 4  |
| Synthesis of Compound 1 .....                        | 4  |
| Synthesis of Compound 2 .....                        | 5  |
| Synthesis of Compound 3 .....                        | 5  |
| Synthesis of Compound 4 .....                        | 6  |
| Synthesis of Compound 5 .....                        | 6  |
| NMR spectra of all compounds .....                   | 7  |
| Compound 1 .....                                     | 7  |
| Compound 2 .....                                     | 10 |
| Compound 3 .....                                     | 12 |
| Compound 4 .....                                     | 14 |
| Compound 5 .....                                     | 16 |
| HRESI-MS spectra of all compounds .....              | 19 |
| Compound 1 .....                                     | 19 |
| Compound 2 .....                                     | 20 |
| Compound 3 .....                                     | 21 |
| Compound 4 .....                                     | 22 |
| Compound 5 .....                                     | 22 |
| Thermal ellipsoid plots .....                        | 23 |
| Compound 1 .....                                     | 23 |
| Compound 4 .....                                     | 23 |
| Compound 5 .....                                     | 24 |
| Experimental references .....                        | 25 |
| DFT computational details .....                      | 26 |

## Experimental

### General information for synthesis

All manipulations were performed under inert conditions using either standard Schlenk or Glove box technique, unless noted otherwise. Molecular sieves were vacuum dried for 3 days at 200 °C. Dichloromethane (DCM, CH<sub>2</sub>Cl<sub>2</sub>) and *n*-hexanes (C<sub>6</sub>H<sub>14</sub>) were collected from an MBRAUN Solvent Purification System, deoxygenated by bubbling Ar for 20 min, and stored over 3 Å molecular sieves. All the deuterated solvents such as acetonitril-d<sub>3</sub> (CD<sub>3</sub>CN) and dichloromethane-d<sub>2</sub> (CD<sub>2</sub>Cl<sub>2</sub>) were used as received and stored over 3 Å molecular sieves. Glassware and stir bars for reactions were dried for overnight in oven at 110 °C. <sup>1</sup>H (500 MHz), <sup>19</sup>F (471 MHz), <sup>19</sup>F{<sup>1</sup>H} (471 MHz), <sup>31</sup>P{<sup>1</sup>H} (202 MHz), and <sup>13</sup>C{<sup>1</sup>H} (126 MHz) NMR spectra were run at 298 K on Bruker 500 spectrometers. The chemical shifts (δ, ppm) for <sup>1</sup>H and <sup>13</sup>C{<sup>1</sup>H} NMR spectra are given relative to solvent signals, whereas external reference standards used for <sup>31</sup>P (85% H<sub>3</sub>PO<sub>4</sub>), <sup>31</sup>P{<sup>1</sup>H} (85% H<sub>3</sub>PO<sub>4</sub>), <sup>19</sup>F (CFCl<sub>3</sub>) and <sup>19</sup>F{<sup>1</sup>H} (CFCl<sub>3</sub>) NMR spectra. These NMR data are written as: chemical shift, multiplicity (s = singlet, d = doublet, t = triplet, q = quartet, m = multiplet, br = broad), coupling constants (Hz) and integration. HRESI-MS analysis was performed on Thermo Scientific Q-Exactive Plus spectrometer.

Single-crystal X-ray diffraction data were collected on a Bruker D8 QUEST diffractometer using Cu (60W, Diamond, μKα = 12.894 mm<sup>-1</sup>) micro-focus X-ray sources. Using Olex2,<sup>1</sup> the structures were solved with the XT structure solution program<sup>2</sup> employing Intrinsic Phasing and refined with the XL refinement package<sup>3</sup> with the Least Squares minimization.

B(C<sub>6</sub>F<sub>5</sub>)<sub>3</sub><sup>4</sup> was prepared by following literature method. P(NMe<sub>2</sub>)<sub>3</sub> was freshly distilled and used. All other reagents were purchased from commercial sources and were used without further purification.

## Synthetic procedures and characterization data

### General procedure

All the reactions were run on 0.10 mmol scale. Unless otherwise noted, to a solution mixture of  $B(C_6F_5)_3$  (2.0 equiv.) and the corresponding bases (2.0 equiv.) in DCM was added a solution of di-(*t*-butyl)azodicarboxylate (1.0 equiv.) in DCM drop wise, bubbling of gas along with colour change was noted in all cases. The reaction was left for magnetic stirring at room temperature for 18 h. After 18 h, all the volatiles were removed *in vacuo*, the solid residue obtained was then washed with hexanes several times (3 x 3 mL). For recrystallization, the solid residue was dissolved in DCM and layered with hexane (1:3) and left at -30 °C overnight.

### Synthesis of Compound 1

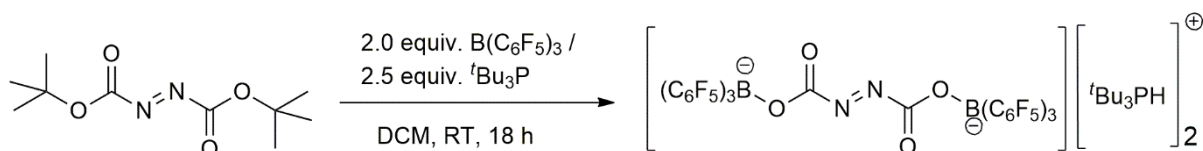

To an open top PTFE (4 mL) vial containing a solution of  $B(C_6F_5)_3$  (102.4 mg, 0.20 mmol, 2.0 equiv.) in DCM was added a solution of  $tBu_3P$  (50.5 mg, 0.25 mmol, 2.5 equiv.) in DCM (0.5 mL). Finally, a solution of di-(*tert*-butyl)azodicarboxylate (23.0 mg, 0.10 mmol, 1.0 equiv.) in DCM (0.5 mL) was added drop wise, bubbling of gas along with colour change from yellow to orange was noted. The reaction mixture was then left under magnetic stirring at room temperature for 18 h. After removing all the volatiles, the orange residue obtained was washed with hexane (3 x 3 mL), drying under vacuum afford compound **1** in 88% (136 mg) yield. Orange color X-ray quality crystals were grown by dissolving compound **1** in DCM and layering with hexane (1:3) at -30 °C overnight.  $^1H$  NMR (500 MHz,  $CD_3CN$ )  $\delta$  5.41 (d,  $J$  = 44 Hz, 1H), 1.61 (d,  $J$  = 15.6 Hz, 27H);  $^{31}P\{^1H\}$  NMR (202 MHz,  $CD_3CN$ )  $\delta$  55.7;  $^{31}P$  NMR (202 MHz,  $CD_3CN$ )  $\delta$  55.7 (dm,  $J$  = 44 Hz);  $^{19}F$  NMR (471 MHz,  $CD_3CN$ )  $\delta$  -135.39 (dd,  $J$  = 22.8, 7.7 Hz), -162.11 (t,  $J$  = 19.6 Hz), -167.58 (td,  $J$  = 22.8, 7.5 Hz).  $^{11}B$  NMR (160 MHz,  $CD_3CN$ )  $\delta$  -3.3;  $^{13}C$  NMR (126 MHz,  $CD_3CN$ )  $\delta$  163.1, 148.9 (d,  $J$  = 241.0 Hz), 140.9, 137.5 (d,  $J$  = 251.9 Hz), 38.0 (d,  $J$

= 28.1 Hz), 30.2; HRESI-MS (+)  $m/z$ : 203.1925  $[M+H]^+$  (calcd.: 203.1923 for  $[C_{12}H_{28}P]^+$ ); HRESI-MS (-)  $m/z$ : 569.9777  $[M]^{2-}$  (calcd.: 569.9788 for  $[C_{38}B_2F_{30}N_2O_4]^{2-}$ ).

### Synthesis of Compound 2

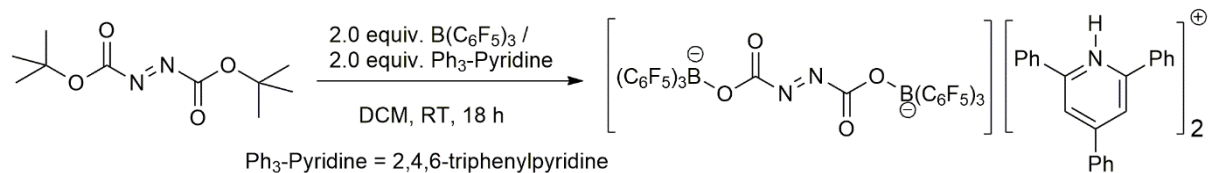

Compound **2** was prepared by following the general procedure described above. Yield = 79% (139 mg). <sup>1</sup>H NMR (500 MHz, CD<sub>3</sub>CN) δ 12.72 (s, 1H), 8.37 (s, 2H), 8.06 (ddt,  $J$  = 18.1, 6.9, 1.7 Hz, 6H), 7.80 – 7.62 (m, 9H); <sup>19</sup>F NMR (471 MHz, CD<sub>3</sub>CN) δ -135.43 (dd,  $J$  = 22.4, 7.6 Hz), -162.10 (t,  $J$  = 19.6 Hz), -165.79 – -169.55 (m); <sup>11</sup>B NMR (160 MHz, CD<sub>3</sub>CN) δ -3.3; <sup>13</sup>C NMR (126 MHz, CD<sub>3</sub>CN) δ 163.1, 155.0, 148.0, 138.5, 136.3, 132.9, 130.5, 130.2, 129.2, 122.4; HRESI-MS (+)  $m/z$ : 308.1435  $[M+H]^+$  (calcd.: 308.1434 for  $[C_{23}H_{18}N]^+$ ); HRESI-MS (-)  $m/z$ : 569.9775  $[M]^{2-}$  (calcd.: 569.9788 for  $[C_{38}B_2F_{30}N_2O_4]^{2-}$ ).

### Synthesis of Compound 3

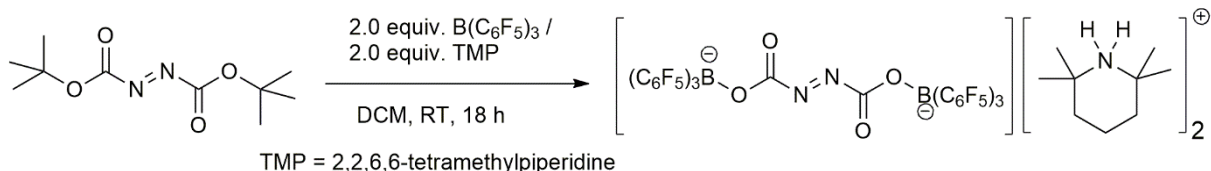

Compound **3** was prepared following the described general procedure above. Yield = 83% (118 mg). <sup>1</sup>H NMR (500 MHz, CD<sub>3</sub>CN) δ 6.23 (t,  $J$  = 48.7 Hz, 2H), 2.03 – 1.74 (m, 2H), 1.64 (p,  $J$  = 4.5 Hz, 4H), 1.37 (s, 12H); <sup>19</sup>F NMR (471 MHz, CD<sub>3</sub>CN) δ -135.41 (dd,  $J$  = 22.9, 7.7 Hz), -162.07 (t,  $J$  = 19.6 Hz), -167.58 (td,  $J$  = 23.0, 7.7 Hz); <sup>11</sup>B NMR (160 MHz, CD<sub>3</sub>CN) δ -3.5; <sup>13</sup>C NMR (126 MHz, CD<sub>3</sub>CN) δ 163.2, 148.9 (d,  $J$  = 245.0 Hz), 140.0 (d,  $J$  = 246.3 Hz), 137.6 (d,  $J$  = 216.0 Hz), 59.3, 35.3, 27.4, 16.6; HRESI-MS (+)  $m/z$ : 142.1591  $[M+H]^+$  (calcd.: 142.1591 for  $[C_9H_{20}N]^+$ ); HRESI-MS (-)  $m/z$ : 569.9775  $[M]^{2-}$  (calcd.: 569.9788 for  $[C_{38}B_2F_{30}N_2O_4]^{2-}$ ).

### Synthesis of Compound 4

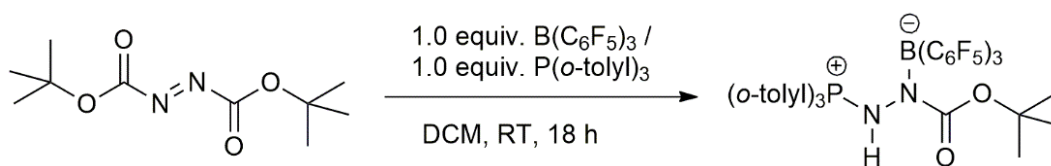

Compound **4** was prepared following the same general procedure described above. Yield = 69% (65.4 mg).  $^1\text{H NMR}$  (500 MHz,  $\text{CD}_2\text{Cl}_2$ )  $\delta$  7.87 (br. s, 3H), 7.60 (t,  $J = 7.6$  Hz, 3H), 7.43 (br. s, 3H), 7.29 (t,  $J = 6.9$  Hz, 3H), 5.33 (s, 1H), 1.93 (s, 9H), 0.90 (s, 9H);  $^{31}\text{P}\{^1\text{H}\}$  NMR (202 MHz,  $\text{CD}_2\text{Cl}_2$ )  $\delta$  34.5;  $^{19}\text{F NMR}$  (471 MHz,  $\text{CD}_2\text{Cl}_2$ )  $\delta$  -134.33 (d,  $J = 22.8$  Hz), -162.46 (t,  $J = 20.4$  Hz), -167.12 (t,  $J = 20.8$  Hz);  $^{11}\text{B NMR}$  (160 MHz,  $\text{CD}_2\text{Cl}_2$ )  $\delta$  -7.7;  $^{13}\text{C NMR}$  (126 MHz,  $\text{CD}_2\text{Cl}_2$ )  $\delta$  186.6, 149.1, 142.4, 137.7, 135.5, 133.6, 132.9, 132.8, 126.3, 81.3, 27.3, 21.6; HRESI-MS (+)  $m/z$ : 947.5644  $[\text{M}+\text{H}]^+$  (calcd.: 947.2050 for  $[\text{C}_{44}\text{H}_{32}\text{BF}_{15}\text{N}_2\text{O}_2\text{P}]^+$ ).

### Synthesis of Compound 5

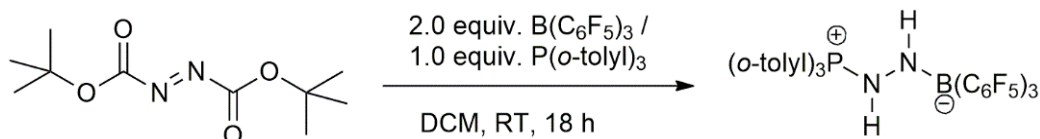

Compound **5** was prepared by following the general procedure described above. Yield = 63% (53.2 mg).  $^1\text{H NMR}$  (500 MHz,  $\text{CD}_2\text{Cl}_2$ )  $\delta$  7.67 (t,  $J = 7.6$  Hz, 3H), 7.50 (dd,  $J = 15.2, 7.9$  Hz, 3H), 7.44 (t,  $J = 6.6$  Hz, 3H), 7.35 (td,  $J = 7.8, 2.6$  Hz, 3H), 4.55 (d,  $J = 29.6$  Hz, 1H), 4.28 (s, 1H), 2.13 (s, 9H);  $^{31}\text{P}\{^1\text{H}\}$  NMR (202 MHz,  $\text{CD}_2\text{Cl}_2$ )  $\delta$  40.5;  $^{19}\text{F NMR}$  (471 MHz,  $\text{CD}_2\text{Cl}_2$ )  $\delta$  -133.48 (d,  $J = 22.2$  Hz), -161.83 (t,  $J = 20.3$  Hz), -163.93 – -168.79 (m);  $^{11}\text{B NMR}$  (160 MHz,  $\text{CD}_2\text{Cl}_2$ )  $\delta$  -7.2;  $^{13}\text{C NMR}$  (126 MHz,  $\text{CD}_2\text{Cl}_2$ )  $\delta$  148.5 (d,  $J = 237.2$  Hz), 144.2 (d,  $J = 9.1$  Hz), 140.0, 137.1 (d,  $J = 247.3$  Hz), 135.3 (d,  $J = 2.3$  Hz), 135.2, 133.8 (d,  $J = 11.5$  Hz), 127.5 (d,  $J = 12.9$  Hz), 119.5 (d,  $J = 97.4$  Hz), 22.4 (d,  $J = 3.7$  Hz); HRESI-MS (+)  $m/z$ : 847.1151  $[\text{M}+\text{H}]^+$  (calcd.: 847.1526 for  $[\text{C}_{39}\text{H}_{24}\text{BF}_{15}\text{N}_2\text{P}]^+$ ).

## NMR spectra of all compounds

## Compound 1

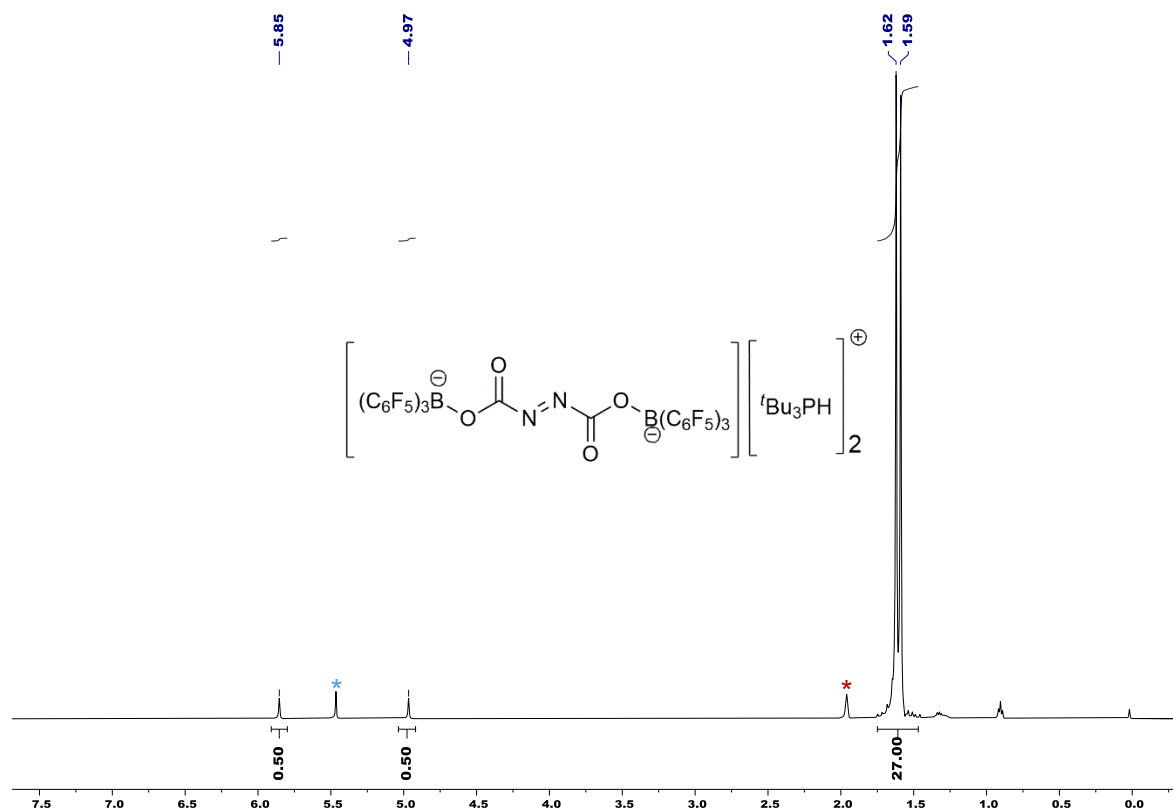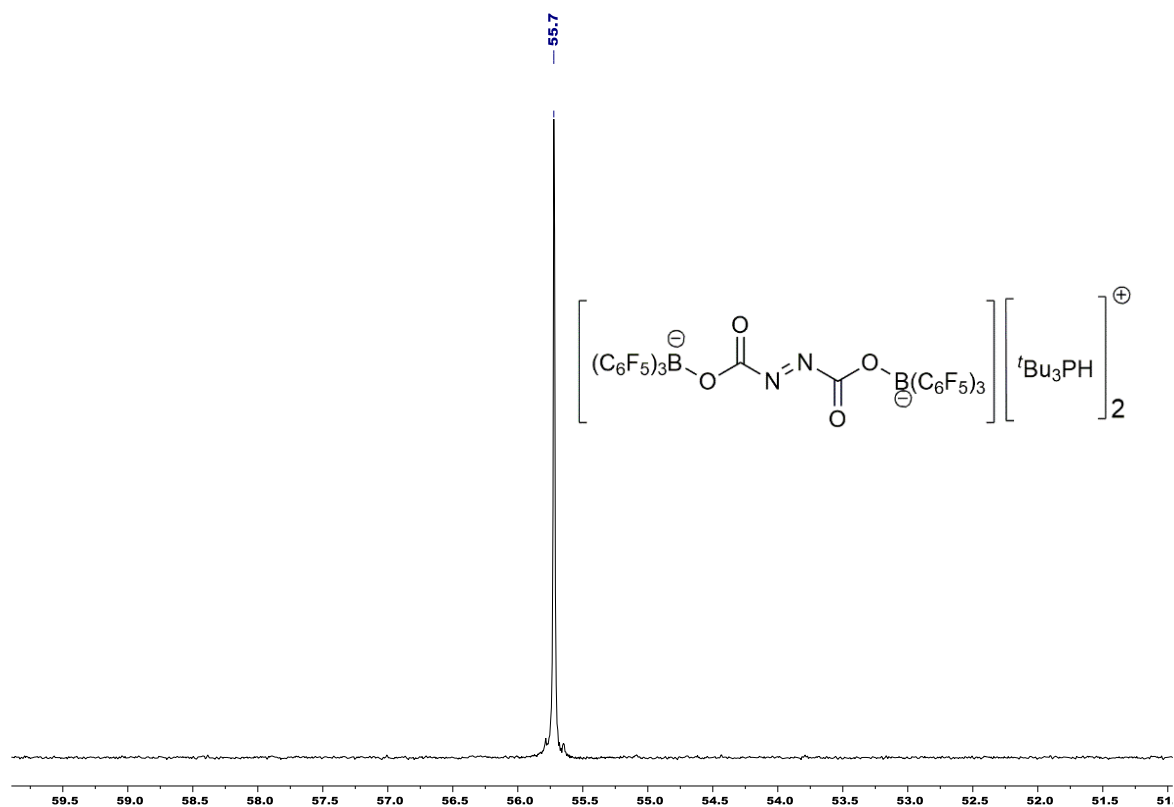

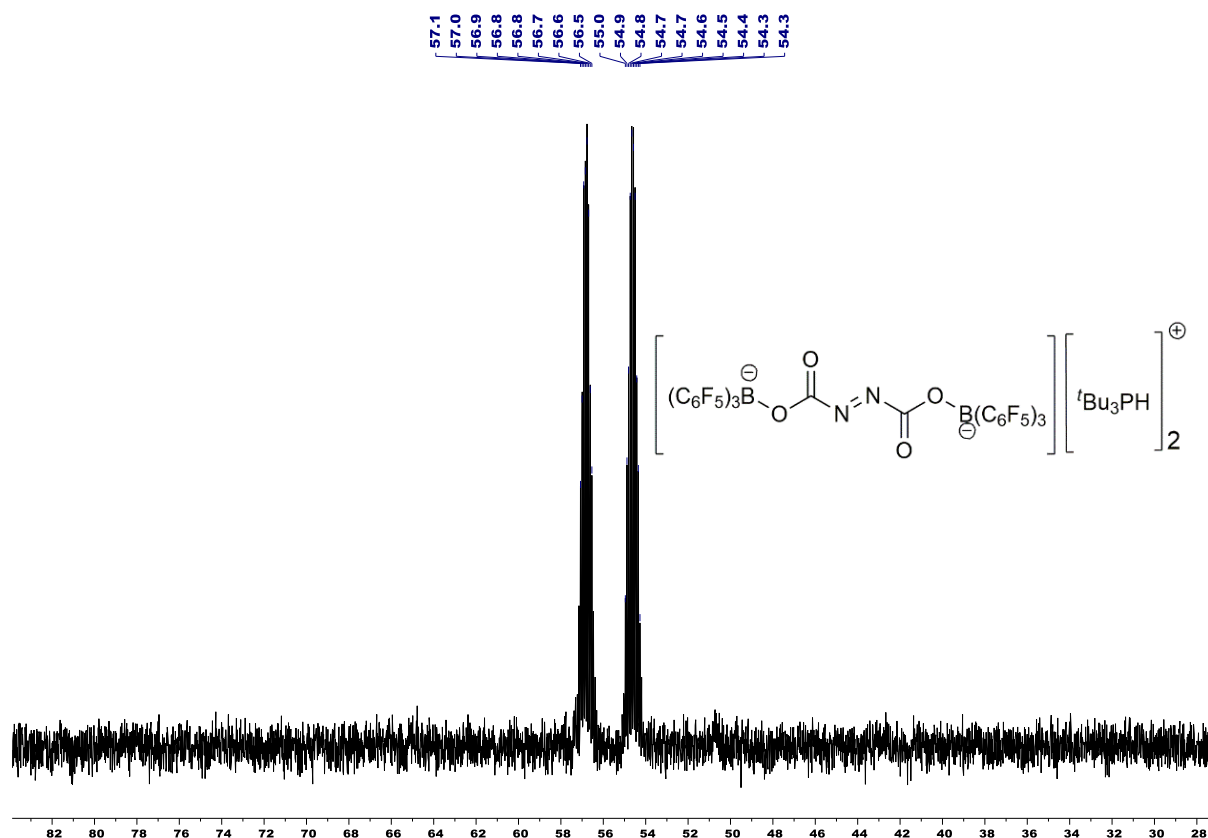Figure S03.  $^{31}\text{P}$  NMR (202 MHz,  $\text{CD}_3\text{CN}$ ) spectrum of the compound 1.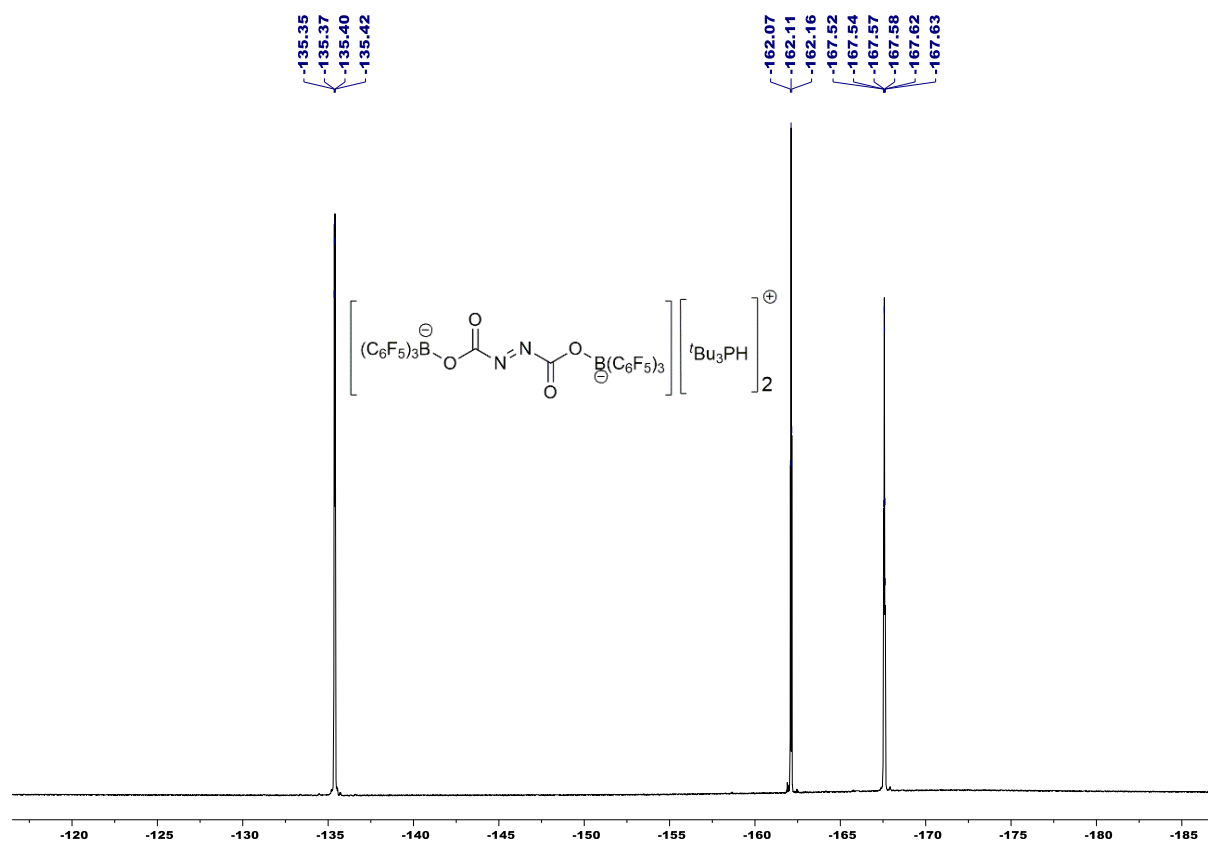Figure S04.  $^{19}\text{F}$  NMR (471 MHz,  $\text{CD}_3\text{CN}$ ) spectrum of the compound 1.



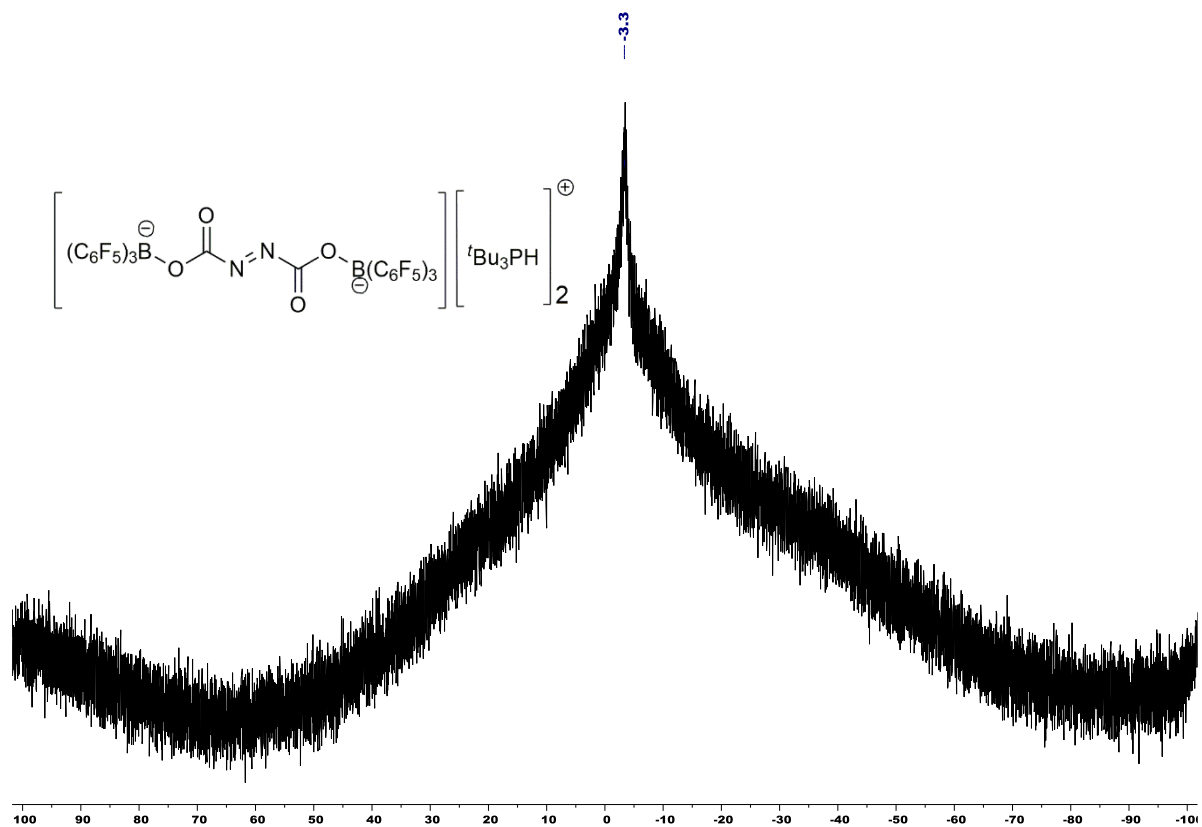

Figure S05.  $^{11}\text{B}$  NMR (160 MHz,  $\text{CD}_3\text{CN}$ ) spectrum of the compound 1.

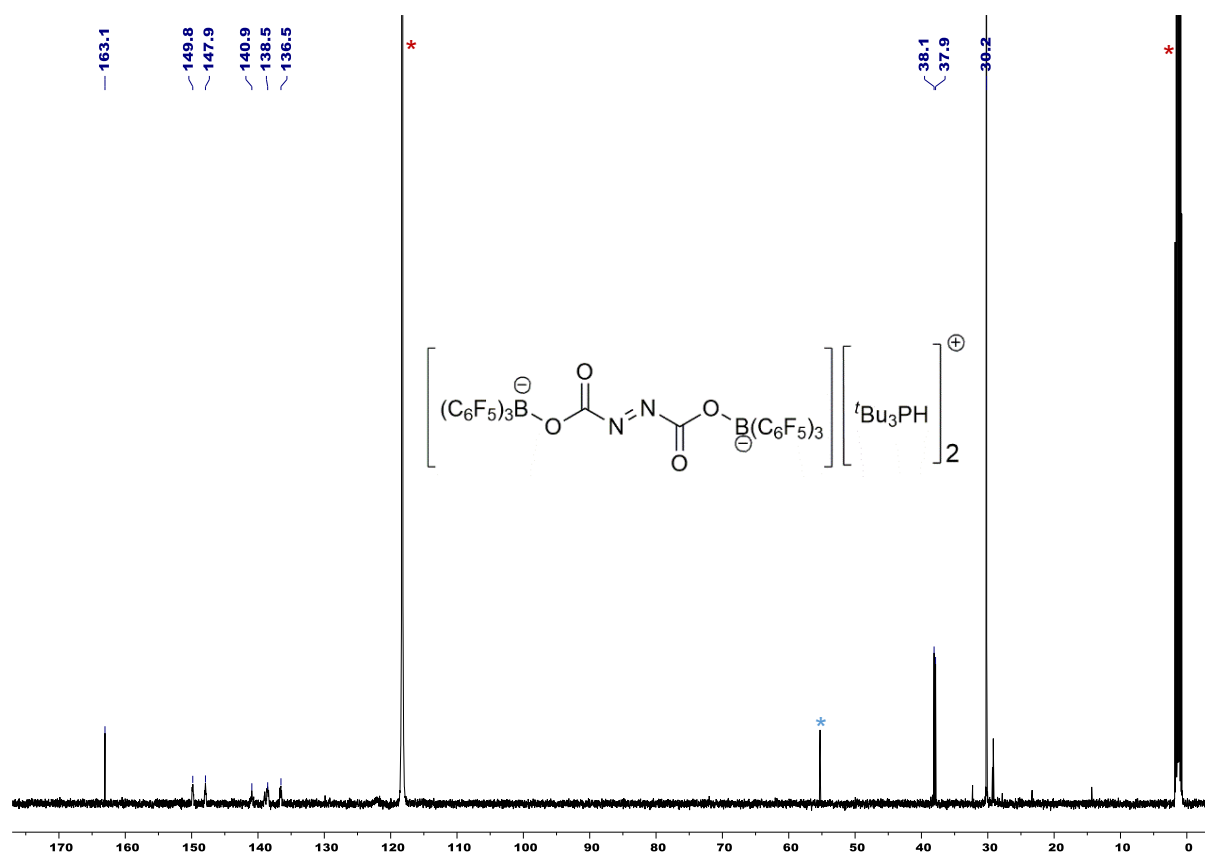

Figure S06.  $^{13}\text{C}$  NMR (126 MHz,  $\text{CD}_3\text{CN}$ ) spectrum of the compound 1 (\*= $\text{CD}_3\text{CN}$ , \*= $\text{DCM}$ ).

## Compound 2

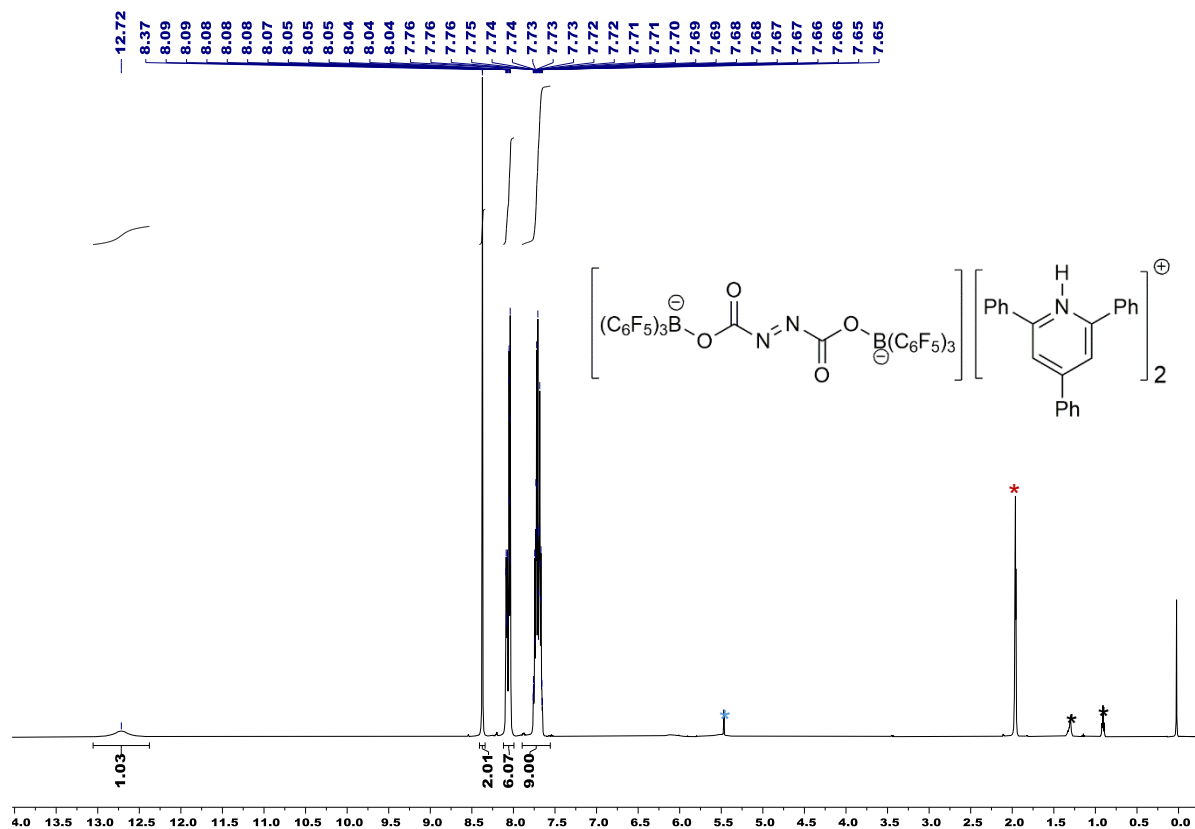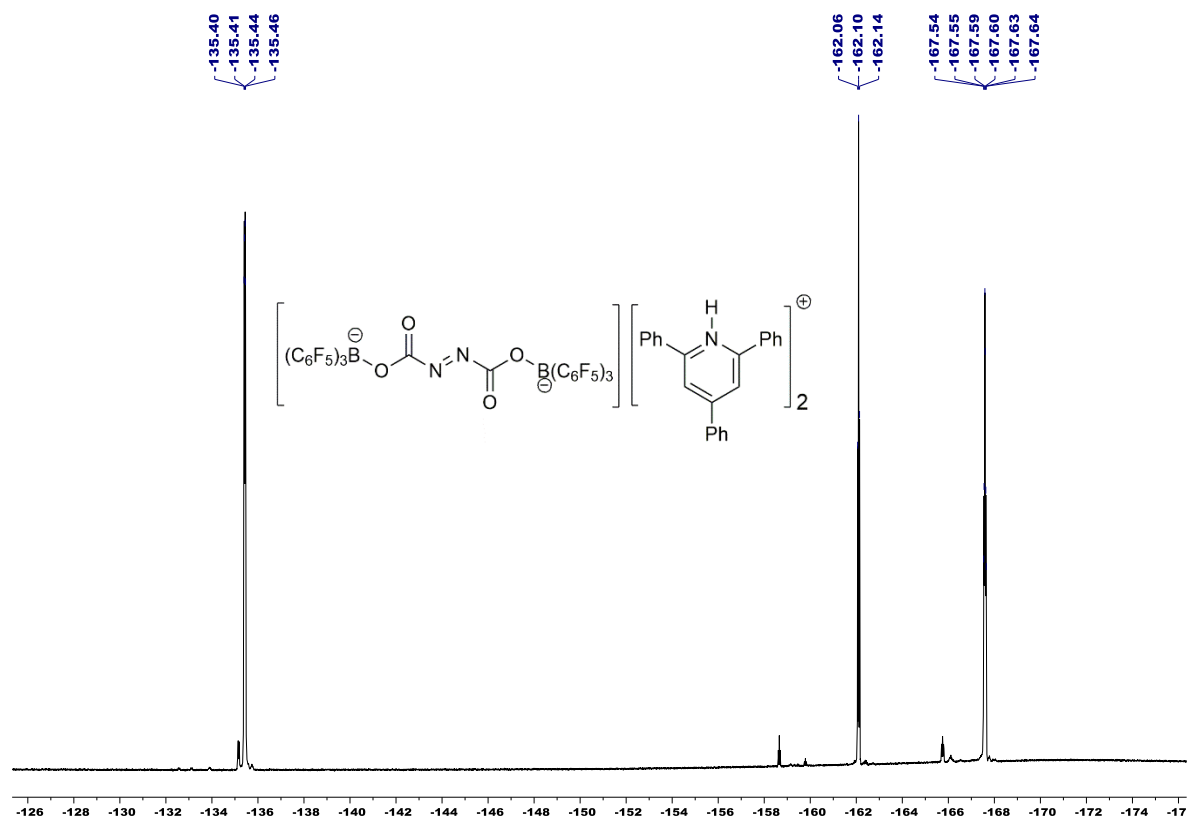

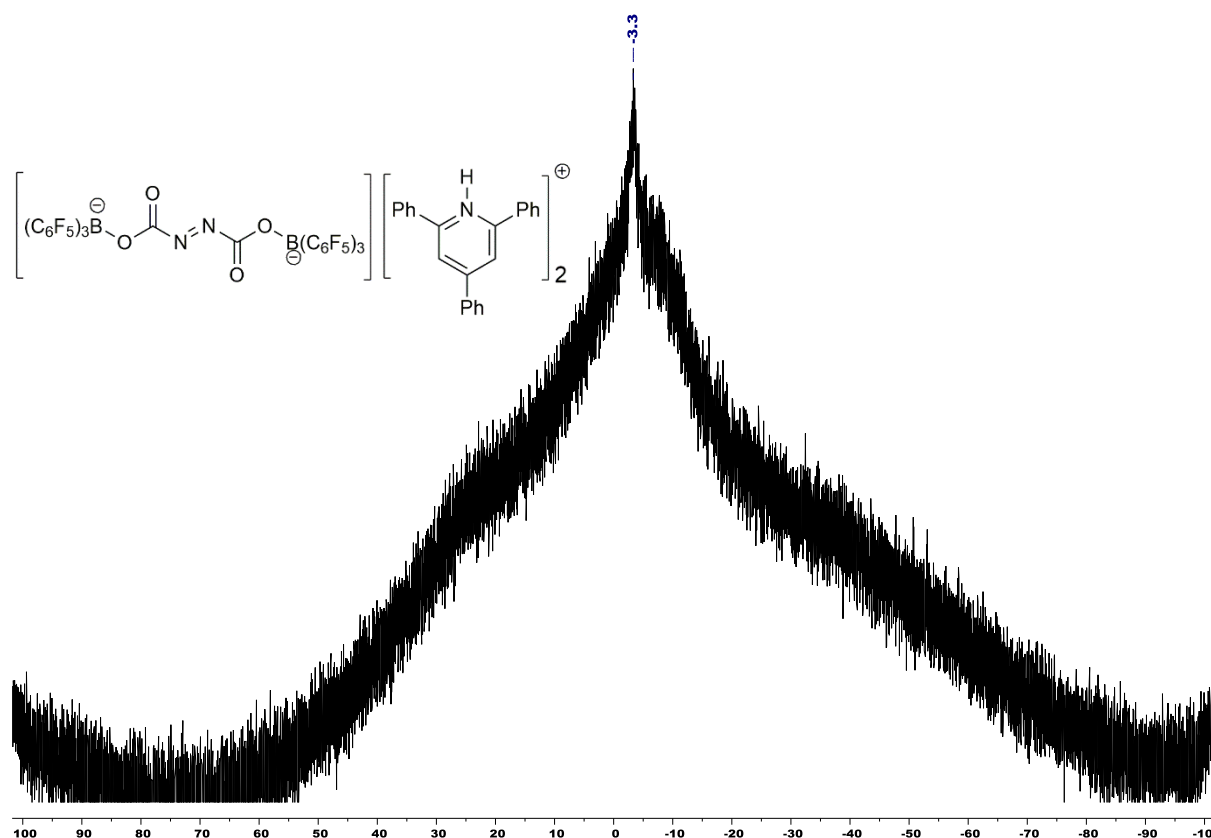Figure S09.  $^{11}\text{B}$  NMR (160 MHz,  $\text{CD}_3\text{CN}$ ) spectrum of the compound 2.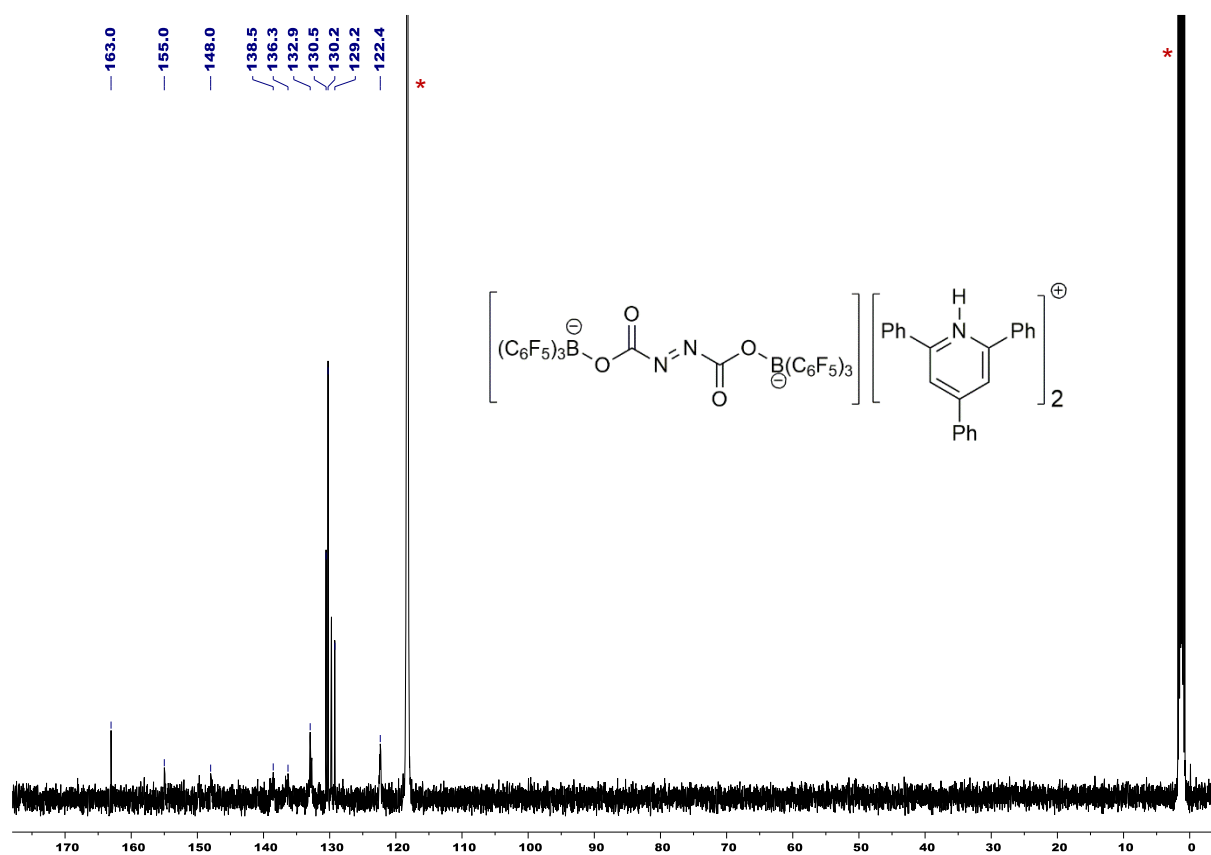Figure S10.  $^{13}\text{C}$  NMR (126 MHz,  $\text{CD}_3\text{CN}$ ) spectrum of the compound 2 (\*= $\text{CD}_3\text{CN}$ ).

## Compound 3

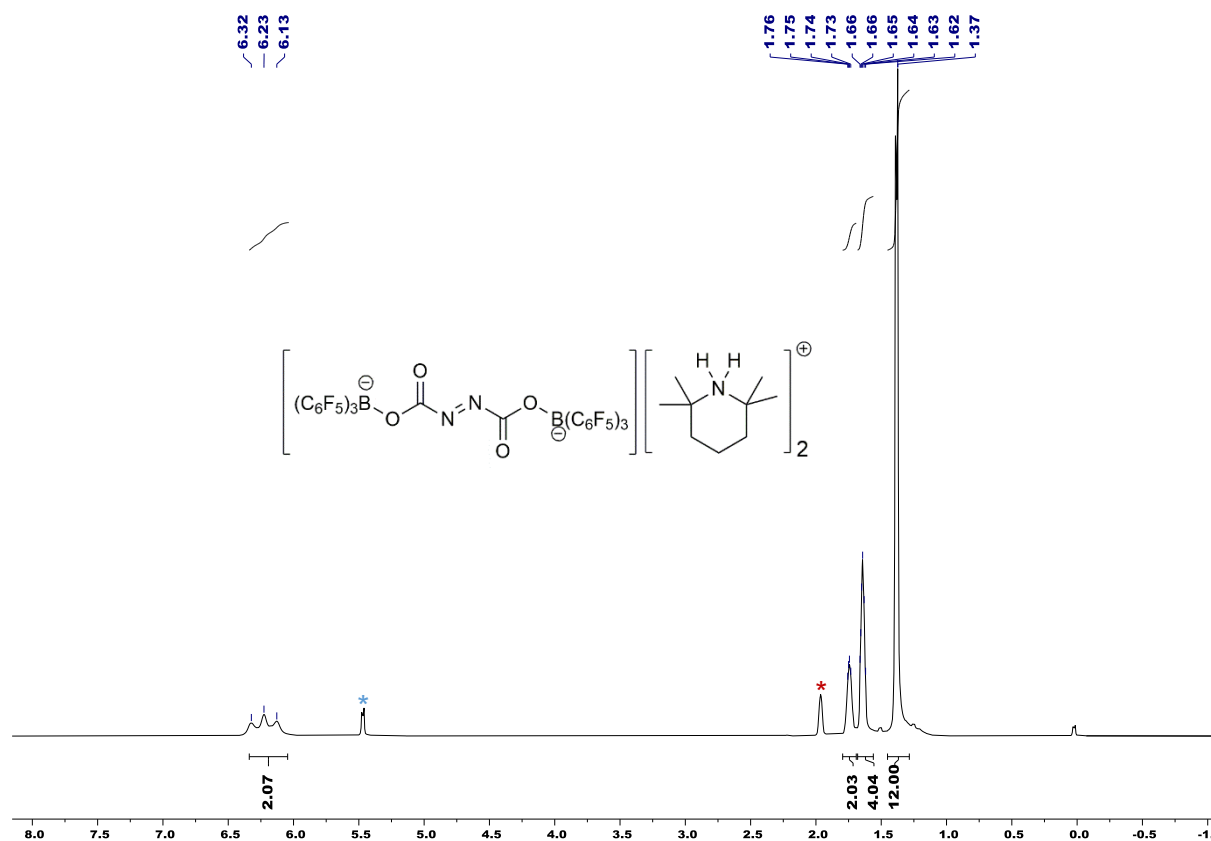Figure S11.  $^1\text{H}$  NMR (500 MHz,  $\text{CD}_3\text{CN}$ ) spectrum of the compound 3 (\*= $\text{CD}_3\text{CN}$ , \*=DCM).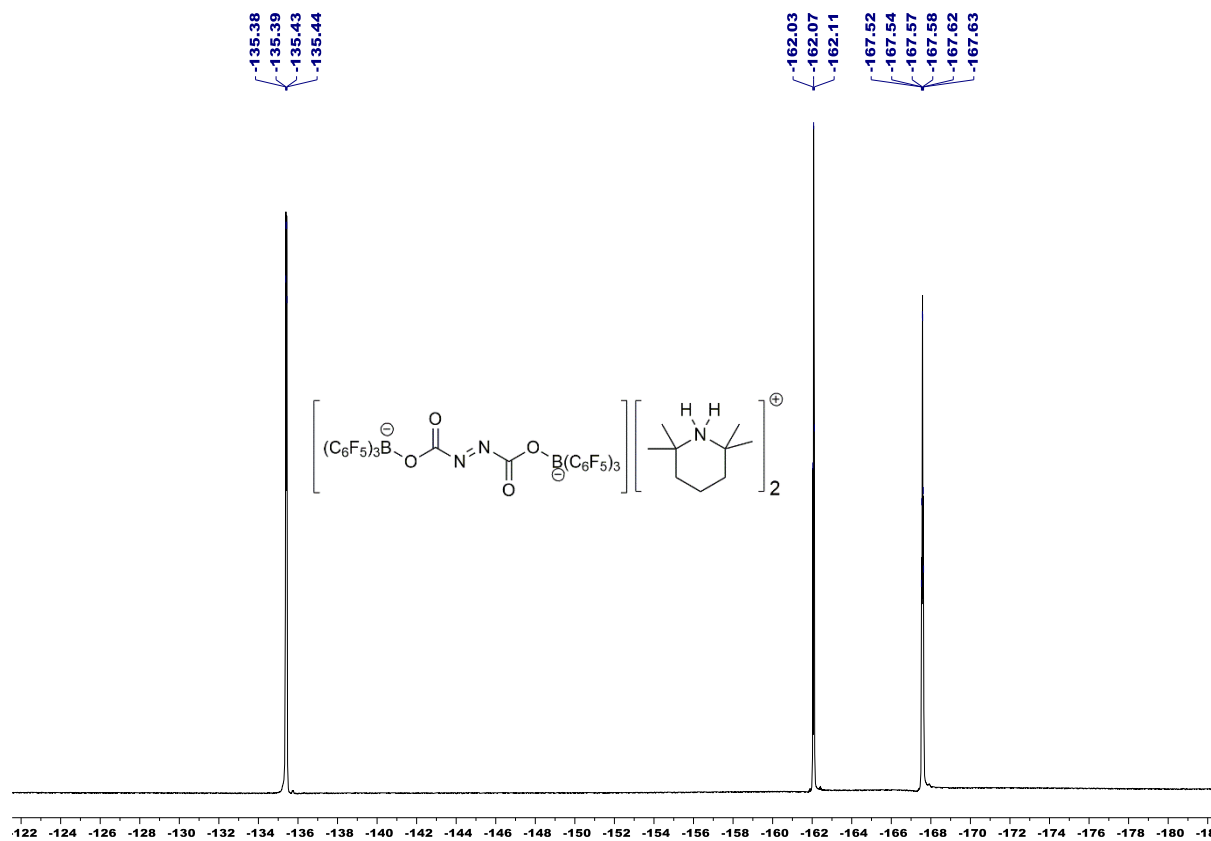Figure S12.  $^{19}\text{F}$  NMR (471 MHz,  $\text{CD}_3\text{CN}$ ) spectrum of the compound 3.

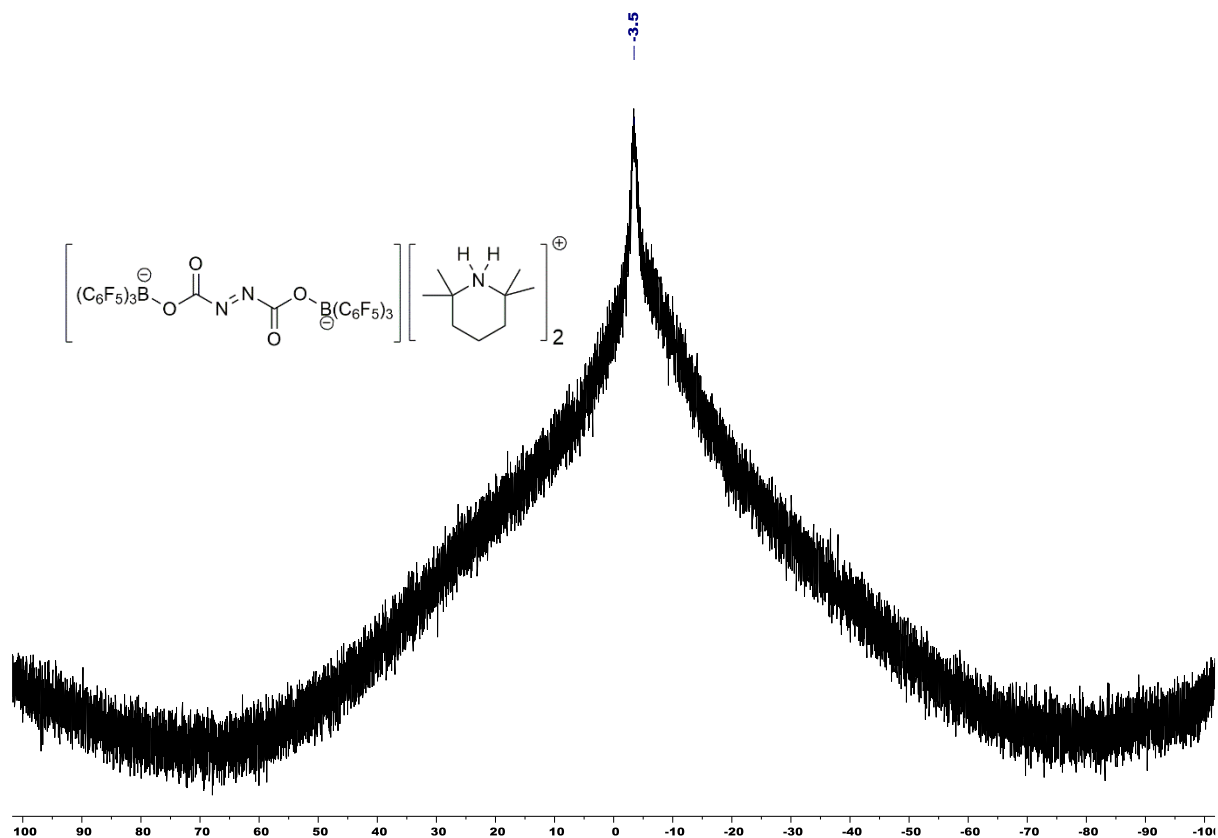Figure S13.  $^{11}\text{B}$  NMR (160 MHz,  $\text{CD}_3\text{CN}$ ) spectrum of the compound 3.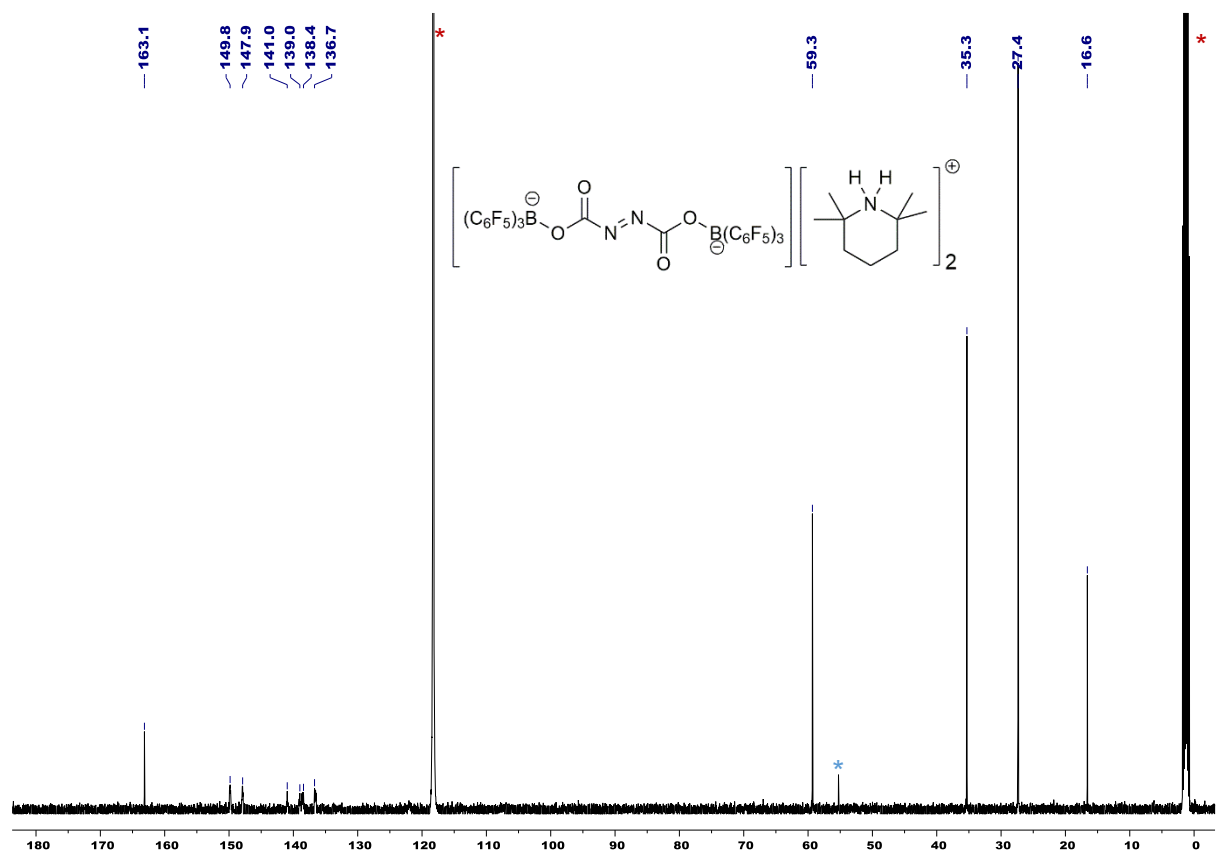Figure S14.  $^{13}\text{C}$  NMR (126 MHz,  $\text{CD}_3\text{CN}$ ) spectrum of the compound 3 (\* =  $\text{CD}_3\text{CN}$ , \* =  $\text{DCM}$ ).

## Compound 4

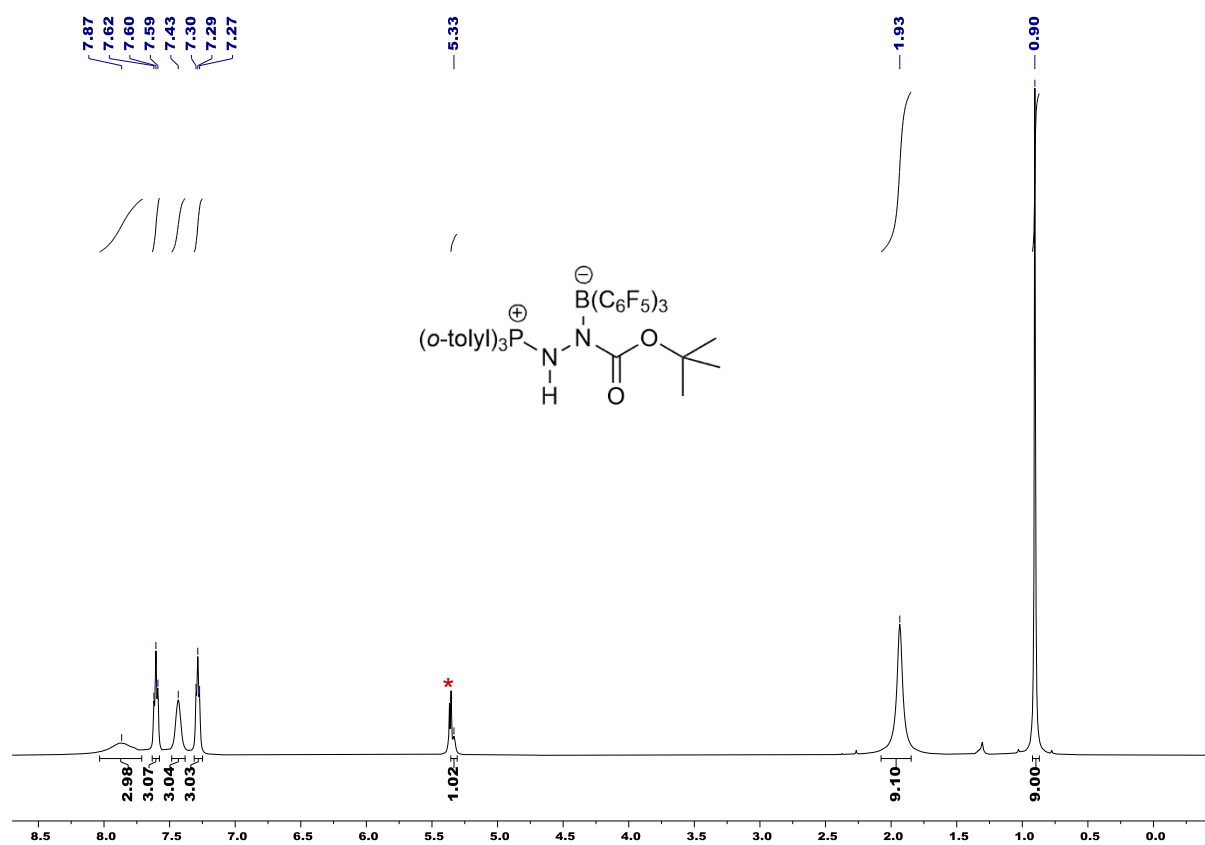Figure S15.  $^1\text{H NMR}$  (500 MHz,  $\text{CD}_2\text{Cl}_2$ ) spectrum of the compound 4 (\*= $\text{CD}_2\text{Cl}_2$ ).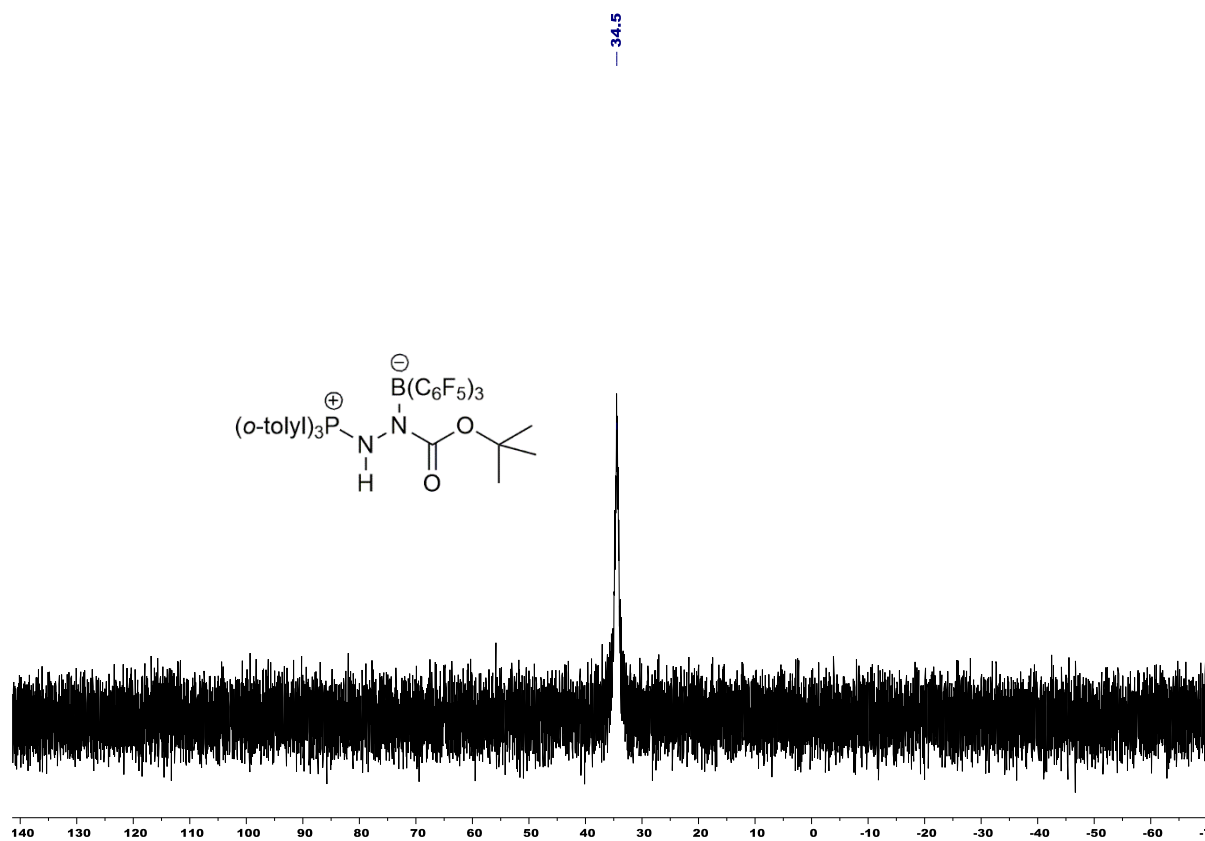Figure S16.  $^{31}\text{P}\{^1\text{H}\}$  NMR (202 MHz,  $\text{CD}_2\text{Cl}_2$ ) spectrum of the compound 4.

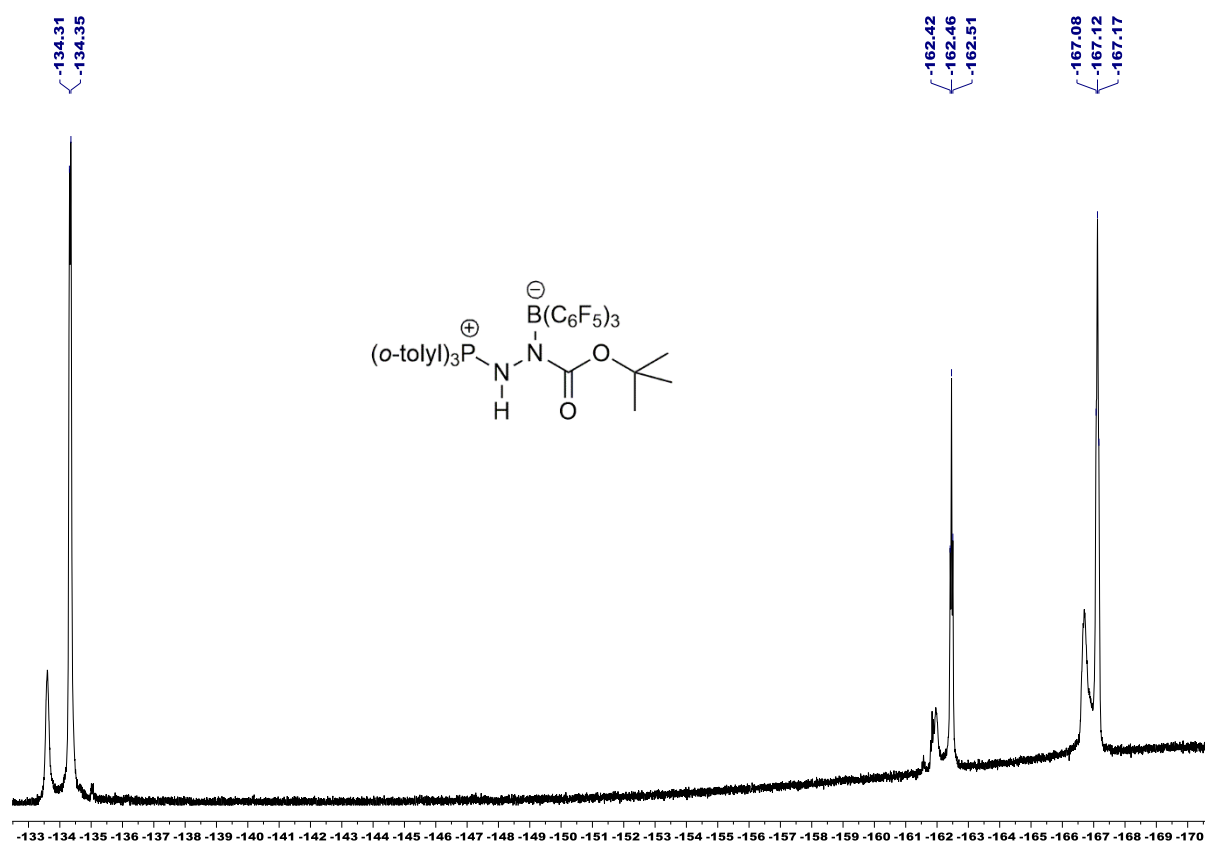Figure S17.  $^{19}\text{F}$  NMR (471 MHz,  $\text{CD}_2\text{Cl}_2$ ) spectrum of the compound **4**.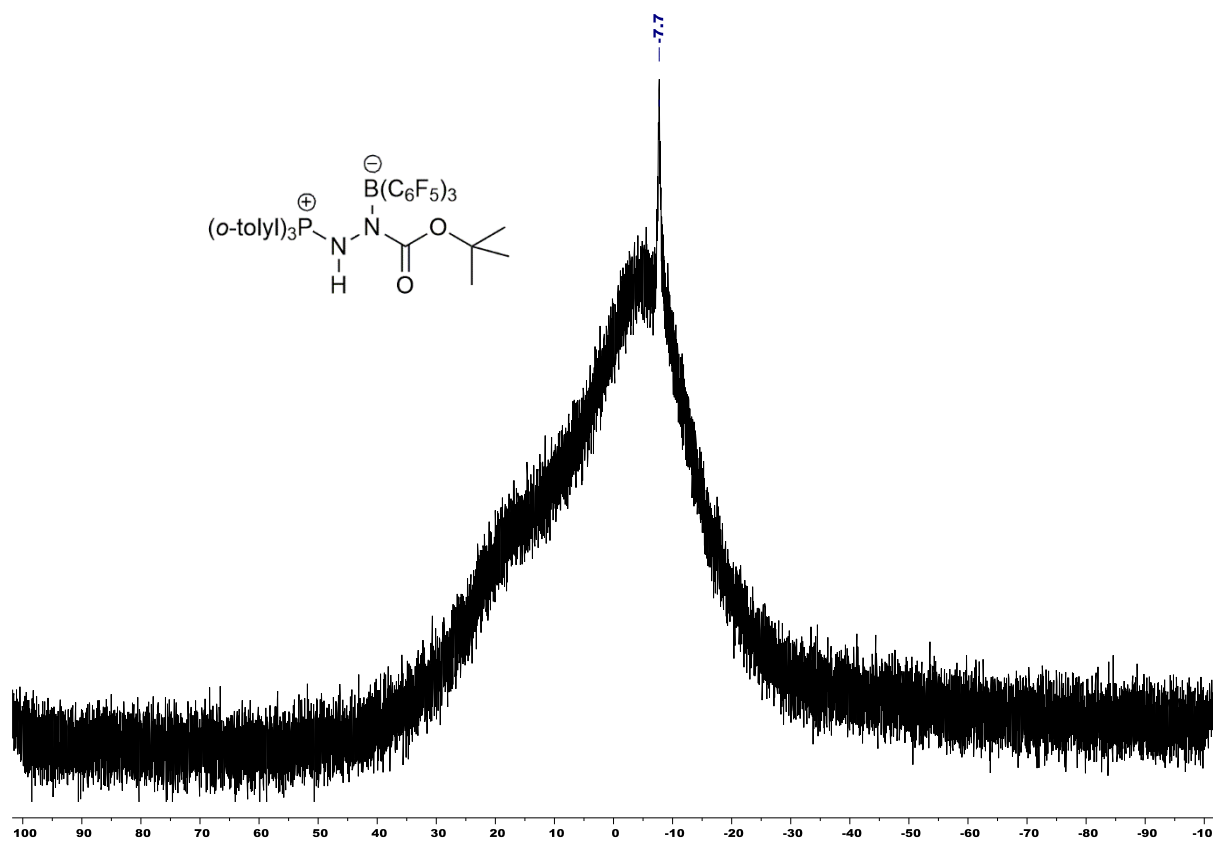Figure S18.  $^{11}\text{B}$  NMR (160 MHz,  $\text{CD}_2\text{Cl}_2$ ) spectrum of the compound **4**.

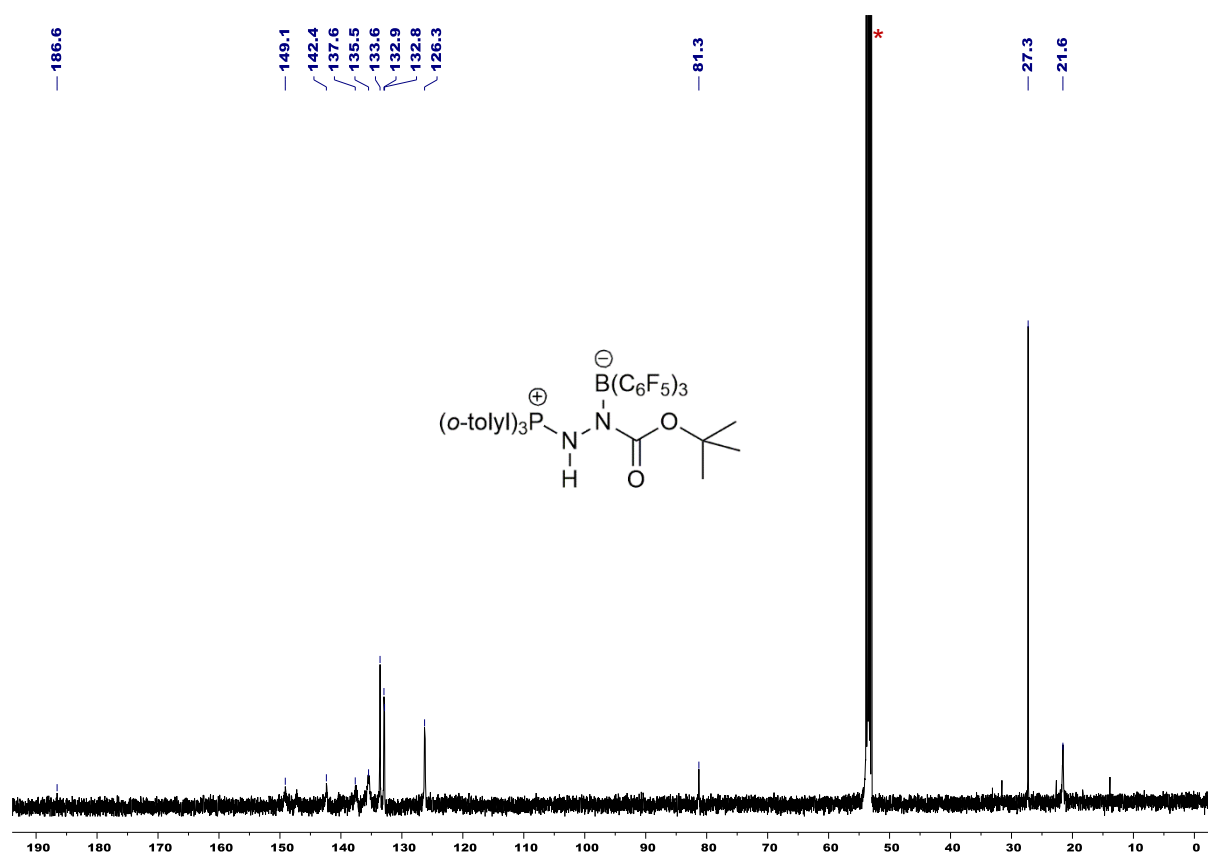Figure S19.  $^{13}\text{C}$  NMR (126 MHz,  $\text{CD}_2\text{Cl}_2$ ) spectrum of the compound 4 (\*= $\text{CD}_2\text{Cl}_2$ ).**Compound 5**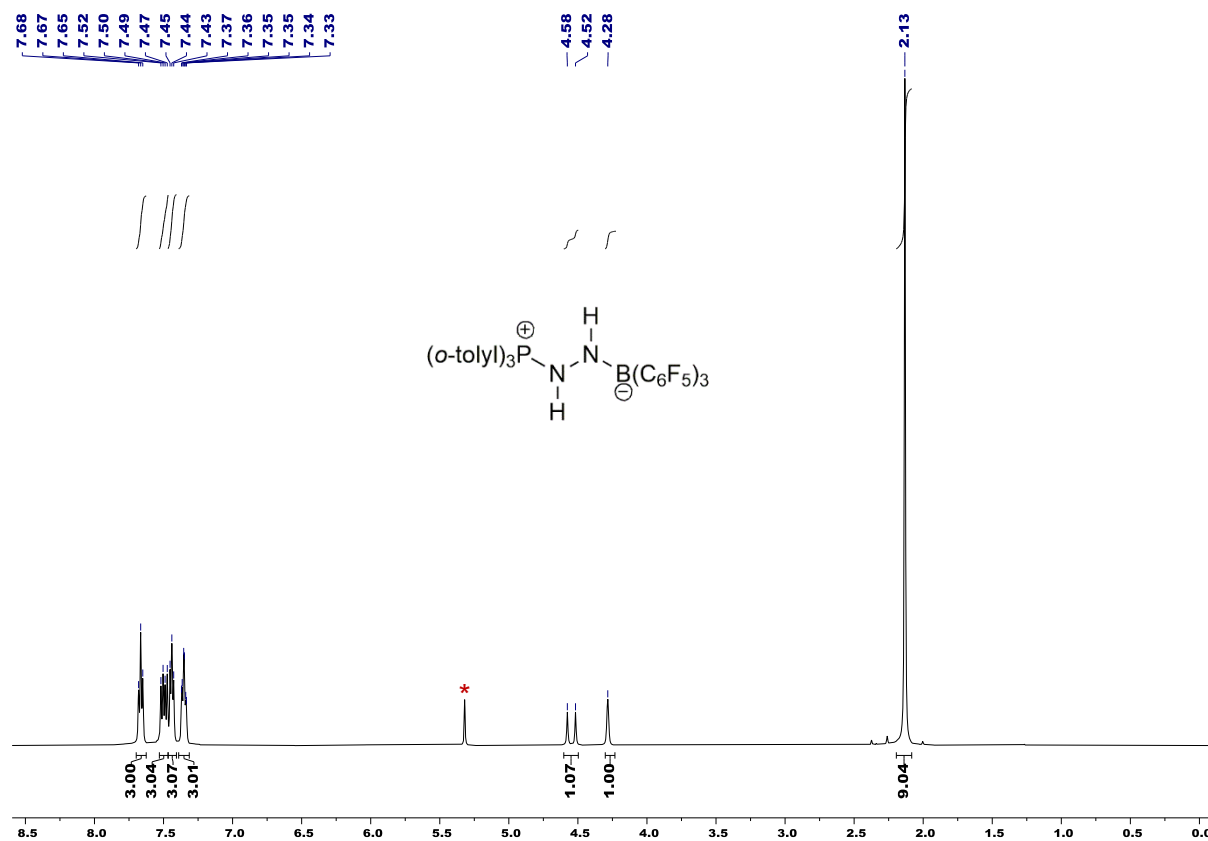Figure S20.  $^1\text{H}$  NMR (500 MHz,  $\text{CD}_2\text{Cl}_2$ ) spectrum of the compound 5 (\*= $\text{CD}_2\text{Cl}_2$ ).



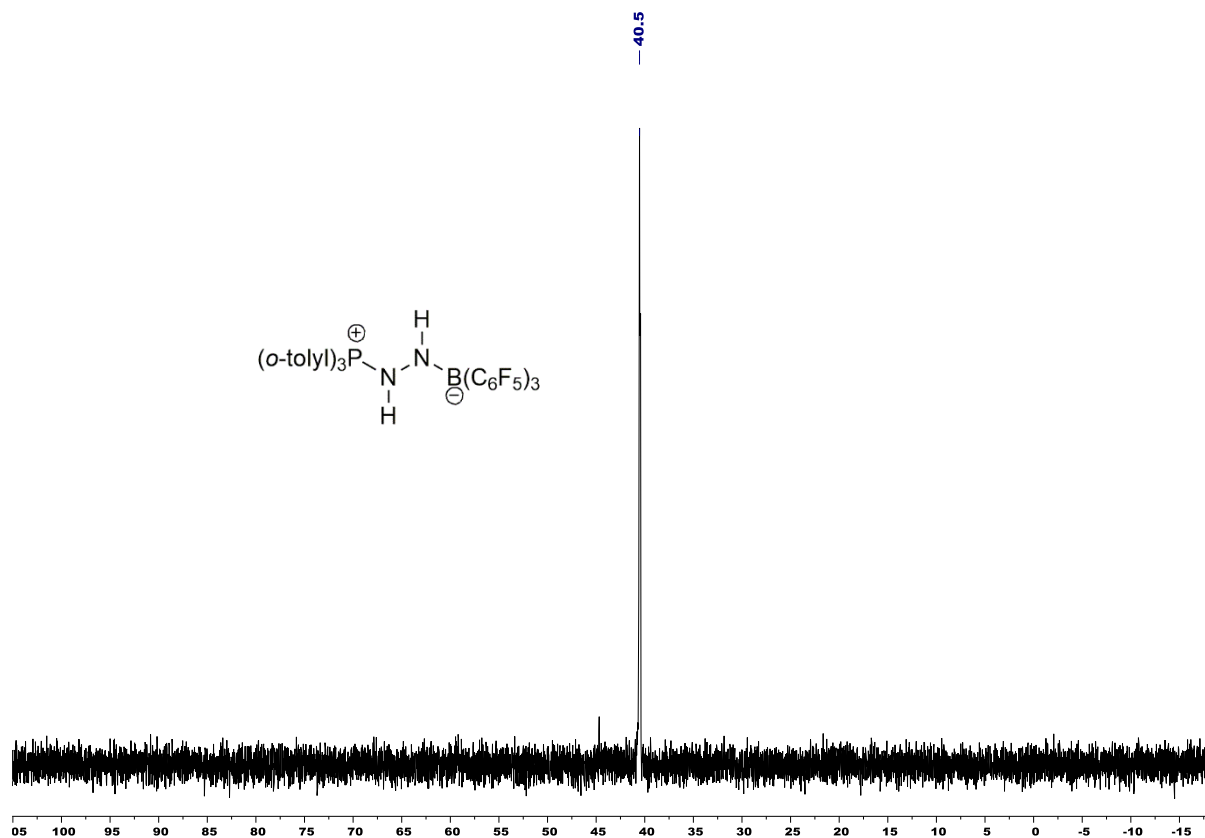Figure S21.  $^{31}\text{P}\{^1\text{H}\}$  NMR (202 MHz,  $\text{CD}_2\text{Cl}_2$ ) spectrum of the compound **5**.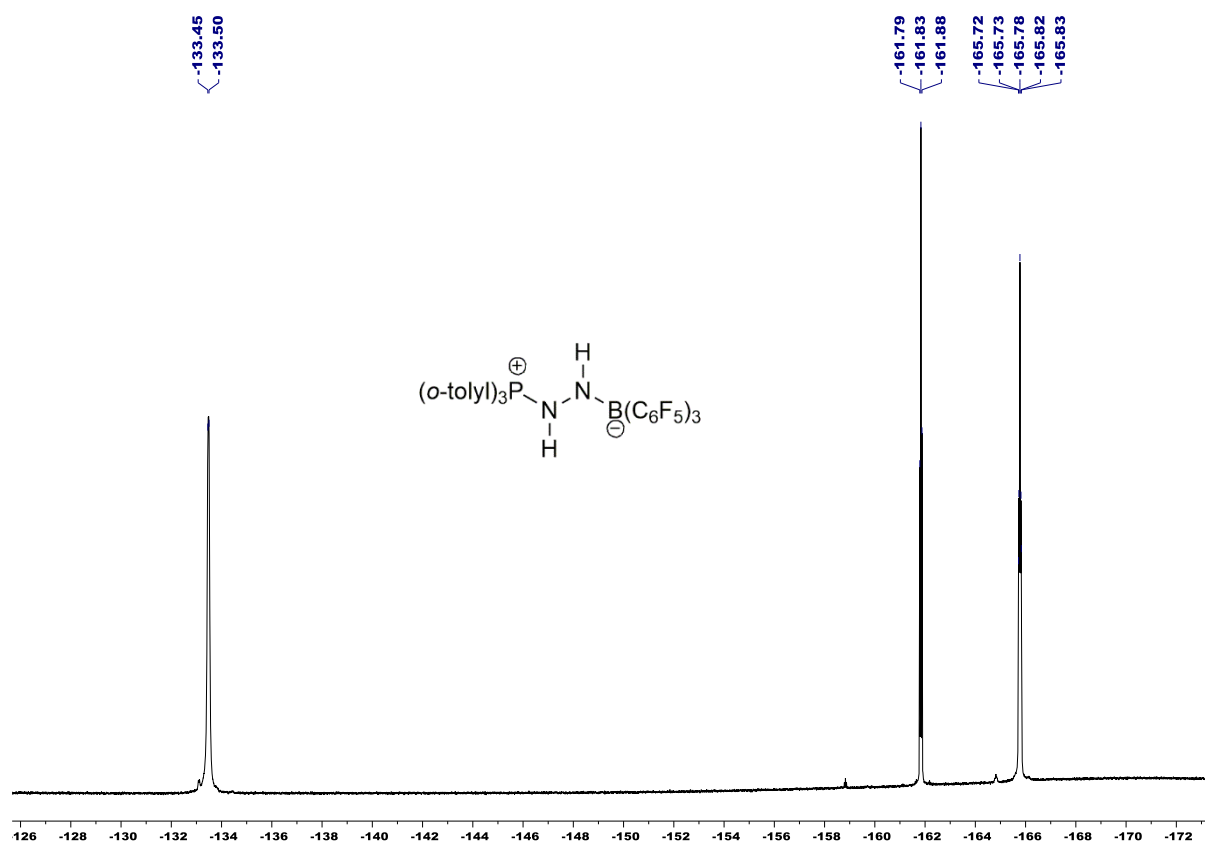Figure S22.  $^{19}\text{F}$  NMR (471 MHz,  $\text{CD}_2\text{Cl}_2$ ) spectrum of the compound **5**.

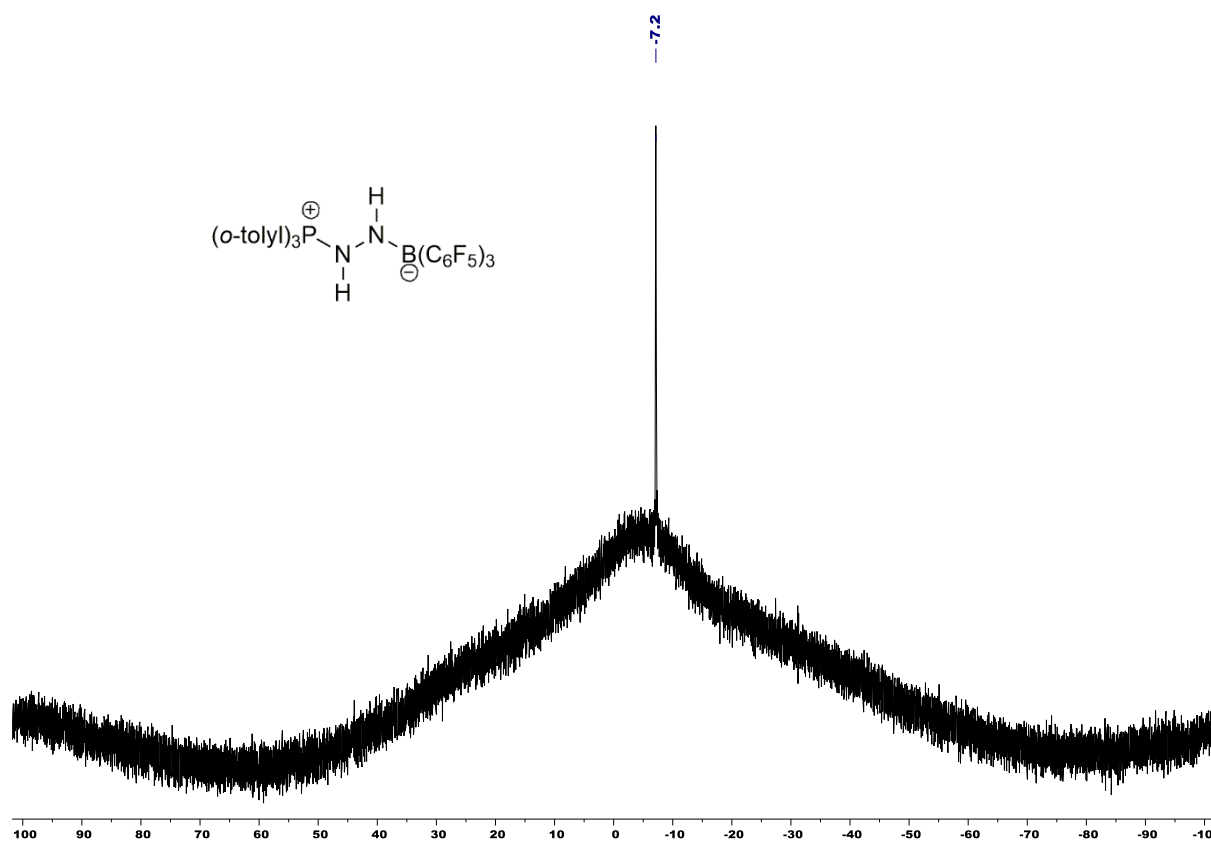Figure S23.  $^{11}\text{B}$  NMR (160 MHz,  $\text{CD}_2\text{Cl}_2$ ) spectrum of the compound 5.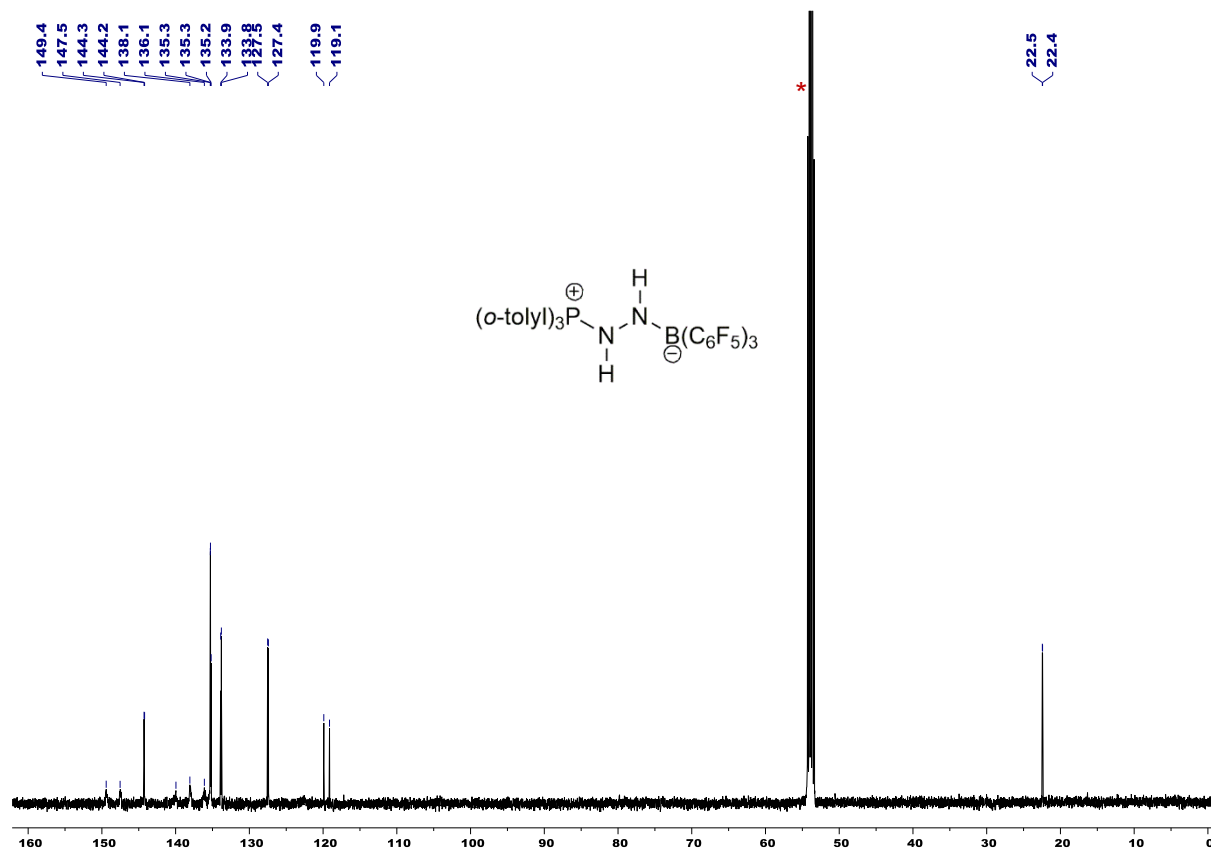Figure S24.  $^{13}\text{C}$  NMR (126 MHz,  $\text{CD}_2\text{Cl}_2$ ) spectrum of the compound 5 (\*= $\text{CD}_2\text{Cl}_2$ ).

## HRESI-MS spectra of all compounds

## Compound 1

1+ #38 RT: 0.17 AV: 1 NL: 1.70E10  
T: FTMS +p ESI Full ms [100.0000-1500.0000]

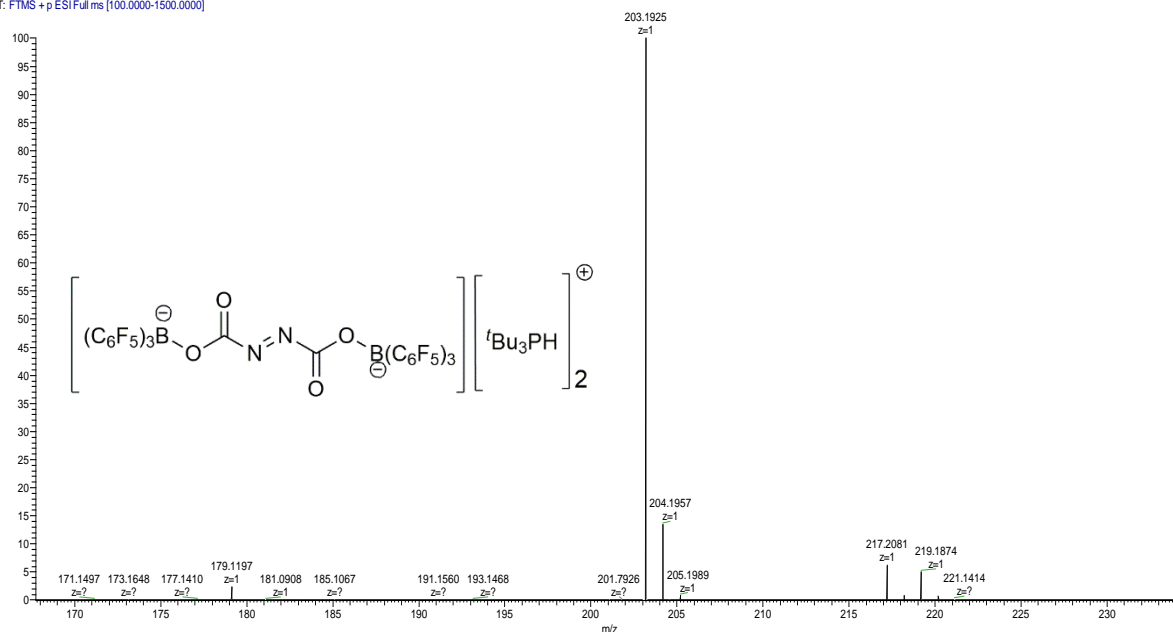

Figure S25. HRESI-MS (+ive mode) spectrum of the compound 1.

1-#35 RT: 0.16 AV: 1 NL: 3.95E9  
T: FTMS -p ESI Full ms [100.0000-1500.0000]

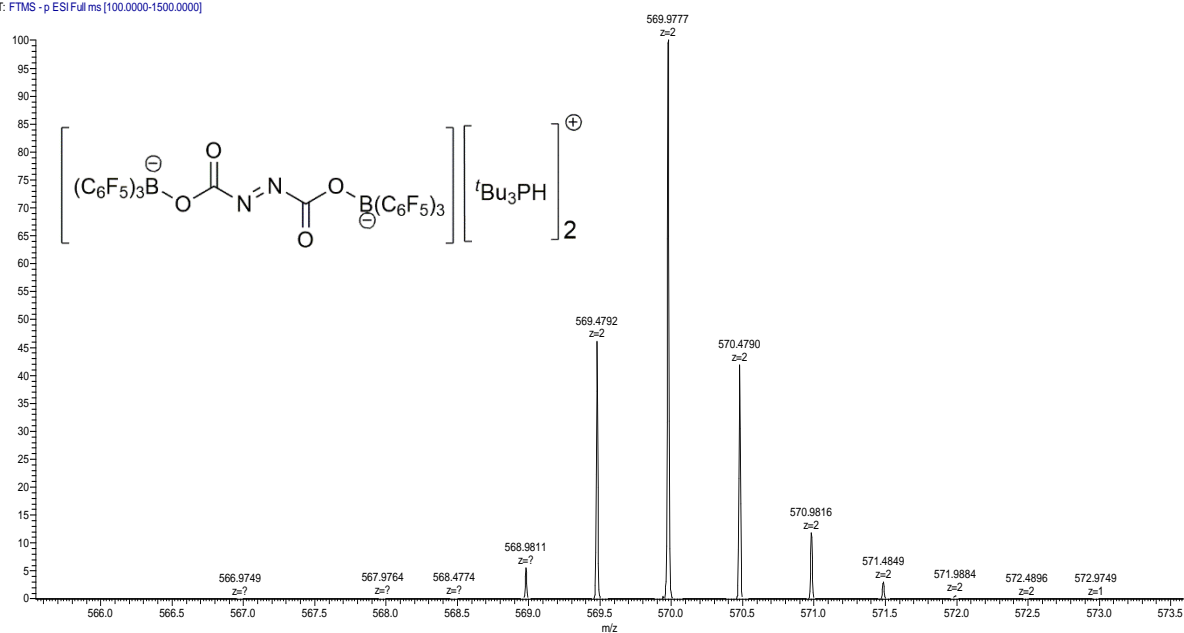

Figure S26. HRESI-MS (-ive mode) spectrum of the compound 1.

## Compound 2

2+ #33 RT: 0.14 AV: 1 NL: 6.41E8  
T: FTMS +p ESI Full ms [100.0000-1500.0000]

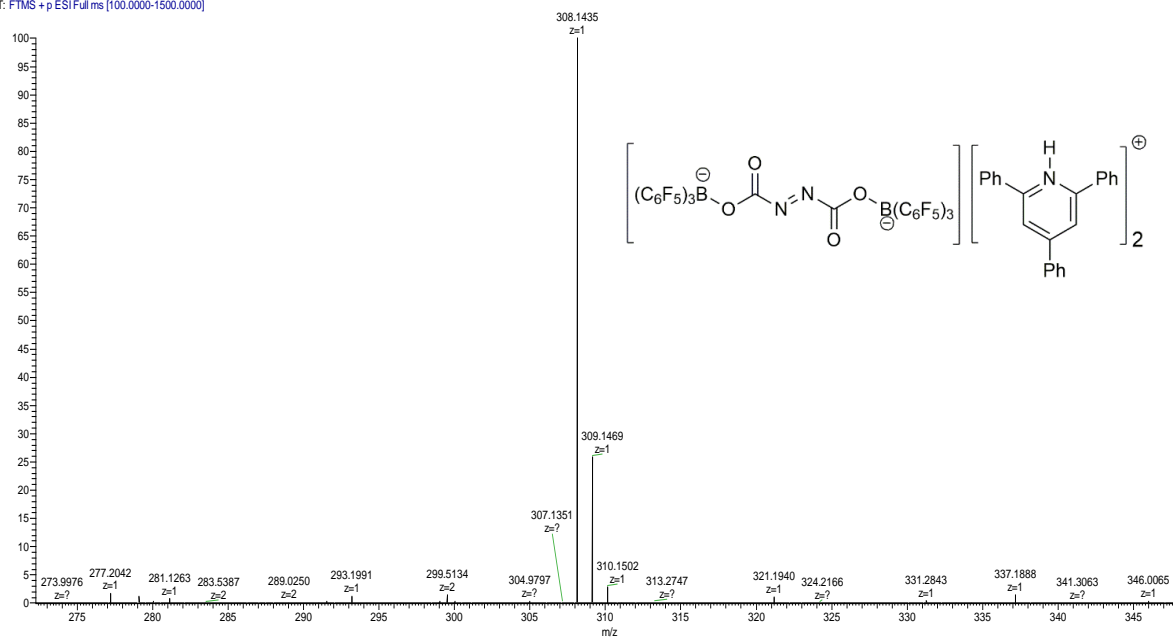

Figure S27. HRESI-MS (+ive mode) spectrum of the compound 2.

2- #36 RT: 0.16 AV: 1 NL: 3.65E9  
T: FTMS -p ESI Full ms [100.0000-1500.0000]

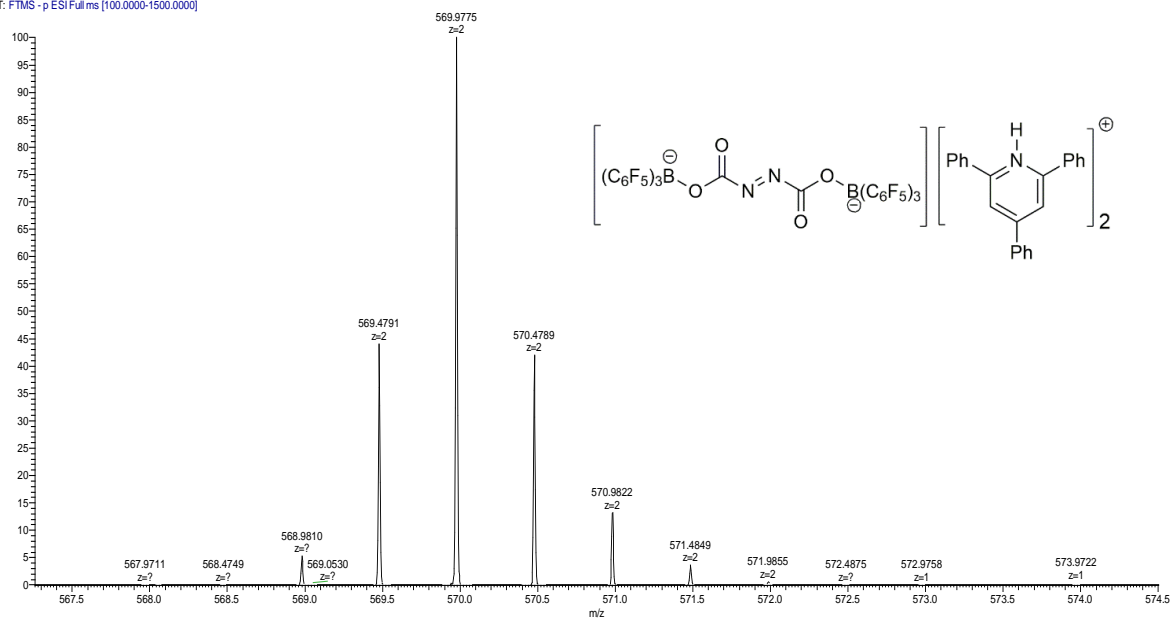

Figure S28. HRESI-MS (-ive mode) spectrum of the compound 2.

## Compound 3

3+ #42 RT: 0.18 AV: 1 NL: 1.79E10  
T: FTMS +p ESI Full ms [100.0000-1500.0000]

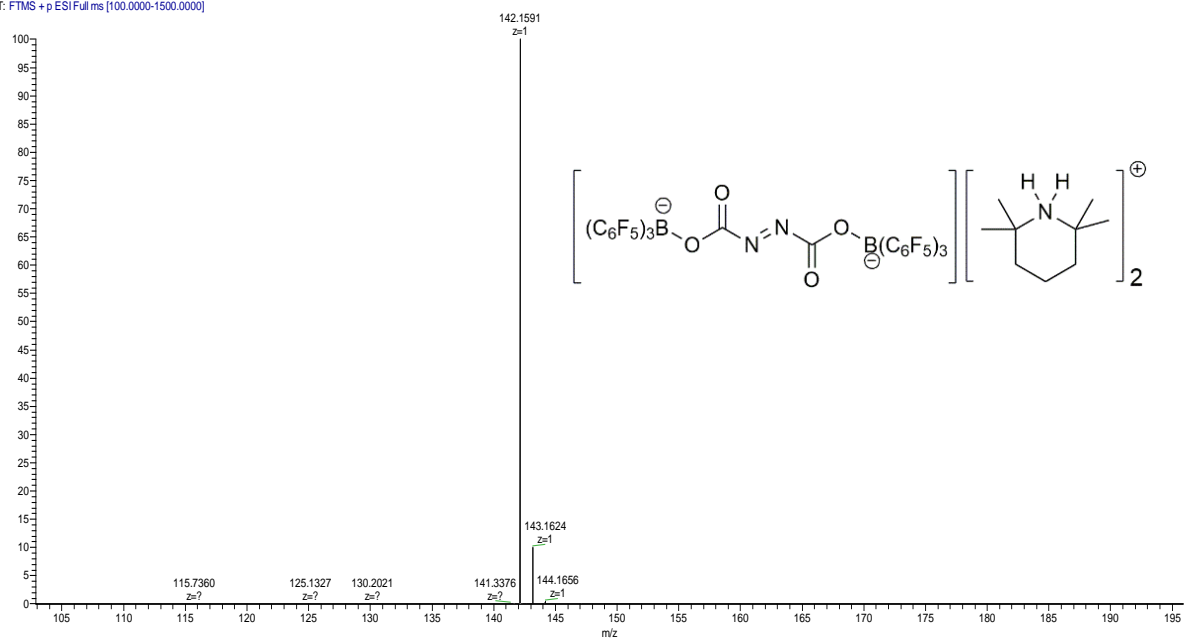

Figure S29. HRESI-MS (+ive mode) spectrum of the compound 3.

3- #46 RT: 0.20 AV: 1 NL: 2.08E9  
T: FTMS -p ESI Full ms [100.0000-1500.0000]

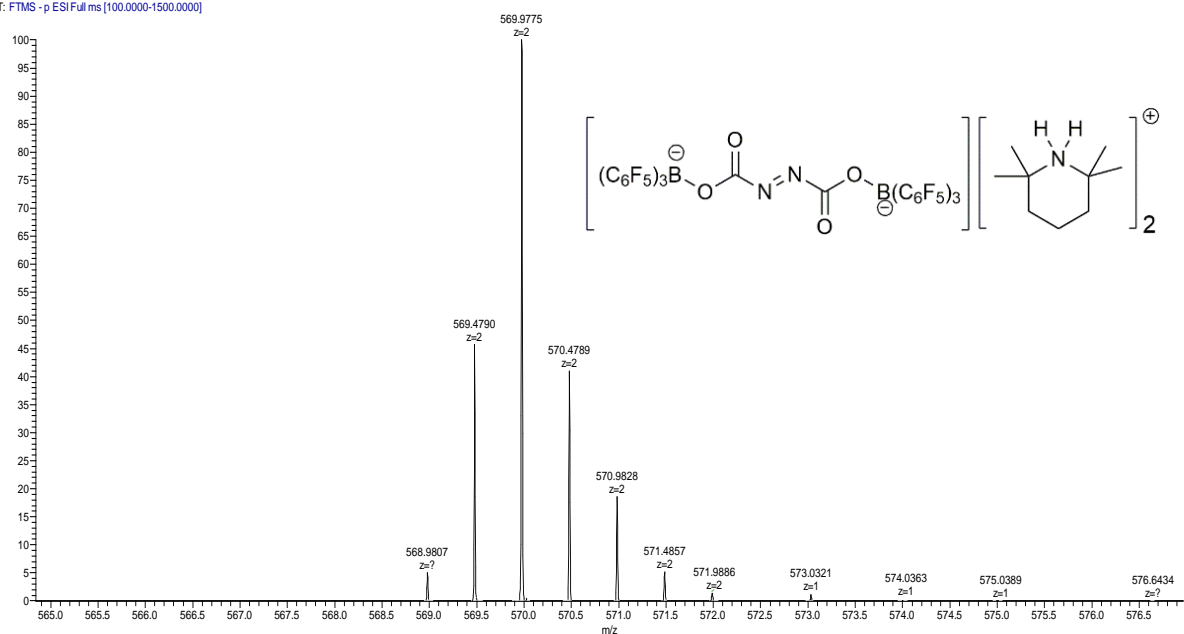

Figure S30. HRESI-MS (-ive mode) spectrum of the compound 3.

## Compound 4

4+ #1134 RT: 4.96 AV: 1 NL: 2.75E6  
T: FTMS +p ESI Full ms [100.0000-1500.0000]

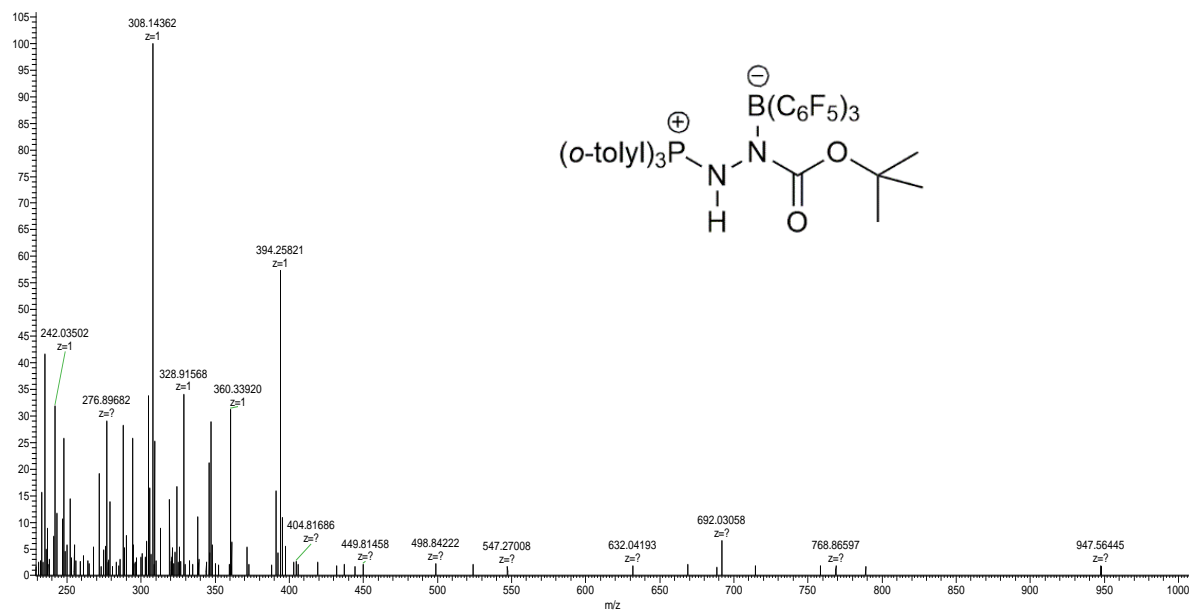

Figure S31. HRESI-MS (+ive mode) spectrum of the compound 4.

## Compound 5

5+ #32 RT: 0.14 AV: 1 NL: 3.29E8  
T: FTMS +p ESI Full ms [100.0000-1500.0000]

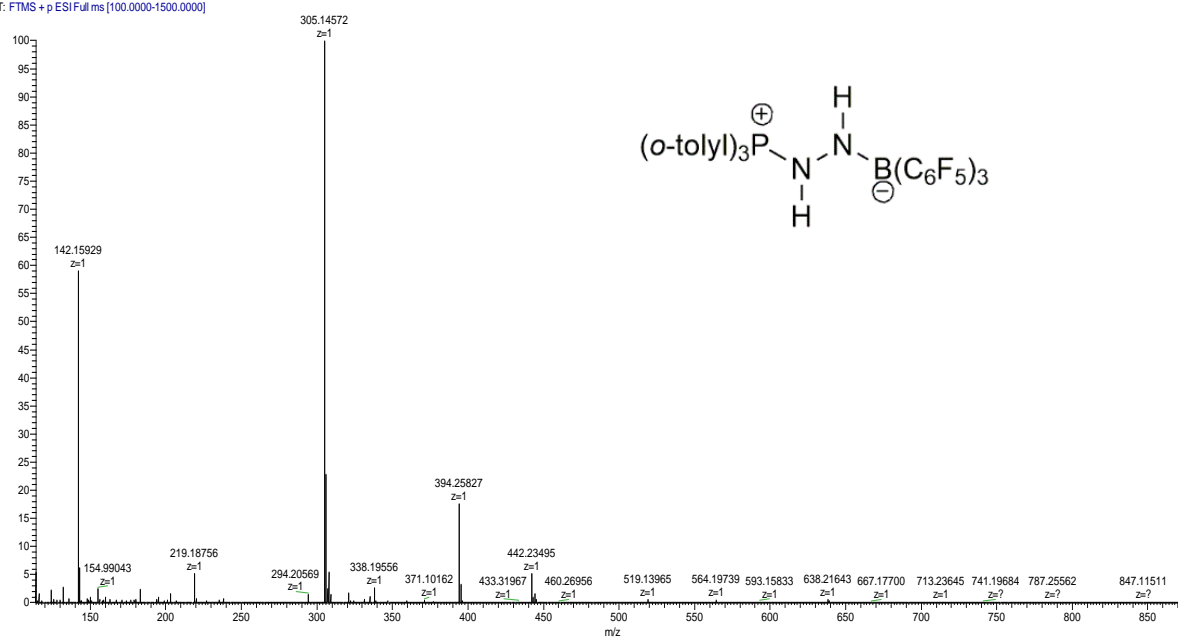

Figure S32. HRESI-MS (+ive mode) spectrum of the compound 5.

## Thermal ellipsoid plots

## Compound 1

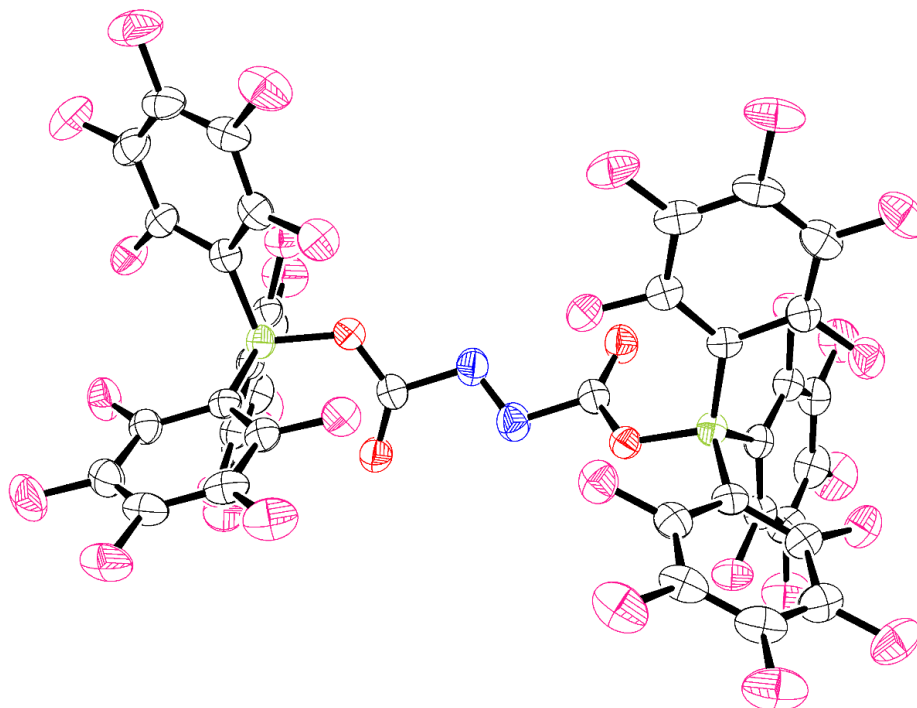

Figure S33. Thermal ellipsoid plot for **1** with the anisotropic displacement parameters depicted at the 50% probability level. Cation parts and hydrogen atoms are omitted for clarity.

## Compound 4

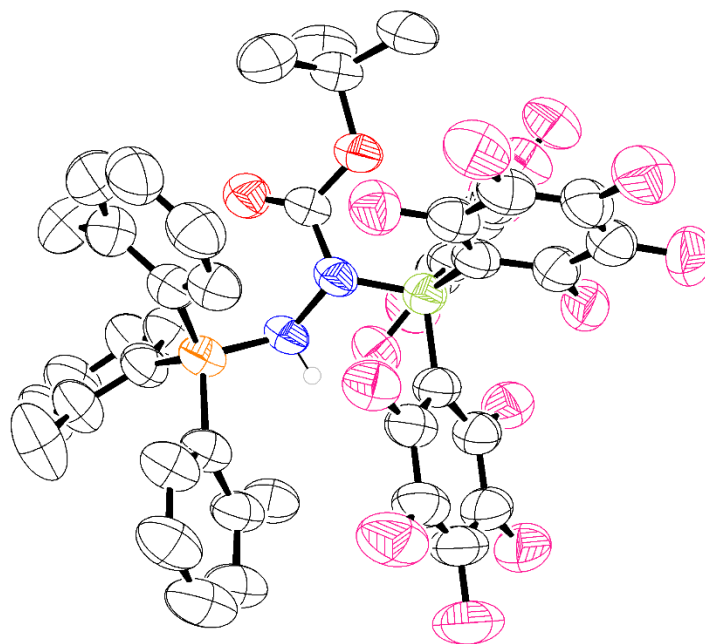

Figure S34. Thermal ellipsoid plot for **4** with the anisotropic displacement parameters depicted at the 50% probability level. Hydrogen atoms except that linked to the N atoms are omitted for clarity.

Compound **5**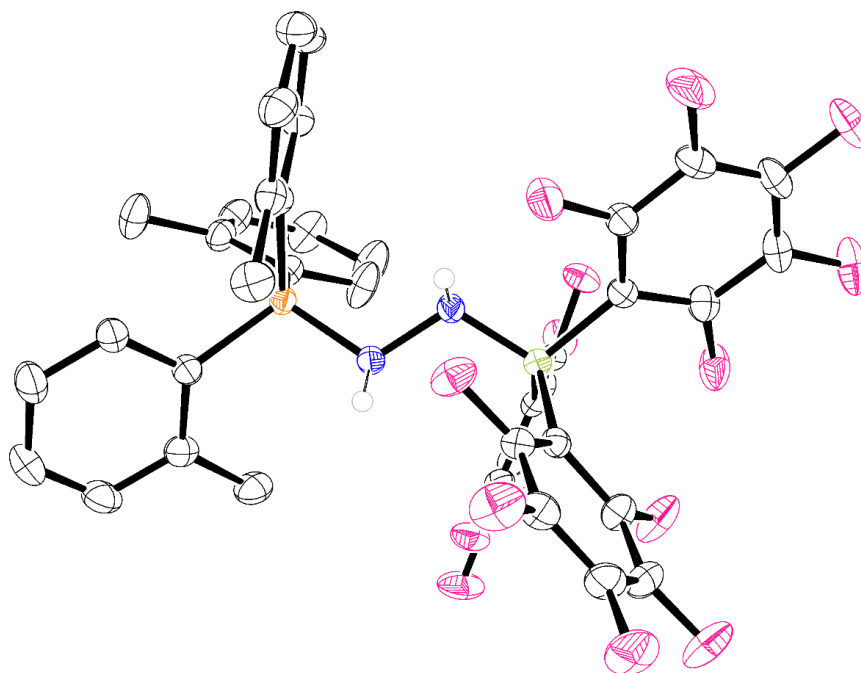

Figure S35. Thermal ellipsoid plot for **5** with the anisotropic displacement parameters depicted at the 50% probability level. Hydrogen atoms expect that linked to the N atoms are omitted for clarity.



**Experimental references**

1. O. V. Dolomanov, L. J. Bourhis, R. J. Gildea, J. A. K. Howard, H. Puschmann, *J. Appl. Crystallogr.* **2009**, *42*, 339-341.
2. G. Sheldrick, *Acta Crystallogr. Sect. A* **2015**, *71*, 3-8.
3. G. Sheldrick, *Acta Crystallogr. Sect. A* **2008**, *64*, 112-122.
4. T. A. Gazis, A. Dasgupta, M. S. Hill, J. M. Rawson, T. Wirth, R. L. Melen, *Dalton Transactions* **2019**, *48*, 12391-12395.

## DFT computational details

### Supporting information (DFT part)

#### Computational Details

The quantum chemical DFT calculations have been performed with the TURBOMOLE 7.4 suite of programs<sup>[1]</sup> The initial structures generated according to their Lewis structures are checked with the CREST method using the xTB program for low-lying conformers as input.<sup>[2]</sup> The structures are fully optimized at the TPSS-D3/def2-SVP + COSMO level of theory, which combines the TPSS meta-GGA density functional<sup>[3]</sup> with the BJ-damped DFT-D3 dispersion correction<sup>[4]</sup> and the def2-SVP basis set,<sup>[5]</sup> using the Conductor-like Screening Model (COSMO) continuum solvation model<sup>[6]</sup> for toluene solvent (dielectric constant  $\epsilon = 2.38$  and solvent radius  $R_{\text{sol}} = 3.48 \text{ \AA}$ ). The density-fitting RI-J approach<sup>[5a, 7]</sup> is used to accelerate the geometry optimization and numerical harmonic frequency calculations<sup>[8]</sup> in solution. The optimized structures are characterized by frequency analysis to identify the nature of located stationary points (no imaginary frequency for true minima and only one imaginary frequency for transition state) and to provide thermal corrections (at 298.15 K and 1 atm) according to the modified ideal gas–rigid rotor–harmonic oscillator model.<sup>[9]</sup> This choice of dispersion-corrected meta-GGA functional makes the efficient exploration of all potential reaction paths possible.

The final solvation free energies in Toluene solution are computed with the COSMO-RS solvation model<sup>[10]</sup> (parameter file: BP\_TZVP\_C30\_1601.ctd) using the COSMOtherm program package<sup>[11]</sup> on the above TPSS-D3 optimized structures, and corrected by  $+1.89 \text{ kcal}\cdot\text{mol}^{-1}$  to account for higher reference solute concentration of  $1 \text{ mol}\cdot\text{L}^{-1}$  usually used in solution. To check the effects of the chosen DFT functional on the reaction energies and barriers, single-point calculations at the meta-GGA TPSS-D3<sup>[3]</sup> and hybrid-meta-GGA PW6B95-D3<sup>[12]</sup> levels are performed using a larger def2-TZVP basis set.<sup>[5b, 13]</sup> The reaction energies from both DFT functionals are in good mutual agreement of  $-0.2 \pm 2.2 \text{ kcal/mol}$  (mean  $\pm$  standard deviation), though as expected  $2.5 \pm 3.1 \text{ kcal/mol}$  higher barriers are found at the PW6B95-D3 level. In our discussion, higher-level PW6B95-D3 Gibbs free energies (in kcal/mol, at 298.15 K and 1 mol/L concentration) are used unless specified otherwise. The applied DFT methods in combination with the large AO basis set provide usually accurate electronic energies leading to errors for chemical energies (including barriers) on the order of typically 1-2 kcal/mol. This has been tested thoroughly for the huge data base GMTKN55<sup>[14]</sup> which is the common standard in the field of DFT benchmarking.

#### References

- [1] *TURBOMOLE V7.4*, 2019, a development of University of Karlsruhe and Forschungszentrum Karlsruhe GmbH, 1989-2007, TURBOMOLE GmbH, since 2007; available from <http://www.turbomole.com>.
- [2] a) P. Pracht, F. Bohle, S. Grimme, *Phys. Chem. Chem. Phys.* **2020**, *22*, 7169-7192; b) S. Grimme, *J. Chem. Theory Comput.* **2019**, *15*, 2847-2862.
- [3] J. Tao, J. P. Perdew, V. N. Staroverov, G. E. Scuseria, *Phys. Rev. Lett.* **2003**, *91*, 146401.
- [4] a) S. Grimme, J. Antony, S. Ehrlich, H. Krieg, *J. Chem. Phys.* **2010**, *132*, 154104-154119; b) S. Grimme, S. Ehrlich, L. Goerigk, *J. Comput. Chem.* **2011**, *32*, 1456-1465.
- [5] a) F. Weigend, M. Häser, H. Patzelt, R. Ahlrichs, *Chem. Phys. Lett.* **1998**, *294*, 143-152; b) F. Weigend, R. Ahlrichs, *Phys. Chem. Chem. Phys.* **2005**, *7*, 3297-3305.
- [6] A. Klamt, G. Schüürmann, *J. Chem. Soc., Perkin Trans. 2* **1993**, 799-805.
- [7] a) K. Eichkorn, F. Weigend, O. Treutler, R. Ahlrichs, *Theor. Chem. Acc.* **1997**, *97*, 119-124; b) F. Weigend, *Phys. Chem. Chem. Phys.* **2006**, *8*, 1057-1065.
- [8] P. Deglmann, K. May, F. Furche, R. Ahlrichs, *Chem. Phys. Lett.* **2004**, *384*, 103-107.
- [9] S. Grimme, *Chem. Eur. J.* **2012**, *18*, 9955-9964.
- [10] F. Eckert, A. Klamt, *AIChE J.* **2002**, *48*, 369-385.
- [11] Eckert, F.; Klamt, A. *COSMOtherm, Version C3.0, Release 16.01; COSMOlogic GmbH & Co. KG, Leverkusen, Germany* **2015**.
- [12] Y. Zhao, D. G. Truhlar, *J. Phys. Chem. A* **2005**, *109*, 5656-5667.
- [13] F. Weigend, F. Furche, R. Ahlrichs, *J. Chem. Phys.* **2003**, *119*, 12753-12762.
- [14] L. Goerigk, A. Hansen, C. Bauer, S. Ehrlich, A. Najibi, S. Grimme, *Phys. Chem. Chem. Phys.* **2017**, *19*, 32184-32215.

**Table S1.** TPSS-D3/def2-SVP + COSMO computed imaginary frequency (ImF), zero-point energies (ZPE), gas-phase enthalpic (Hc) and Gibbs free-energy (Gc) corrections; the COSMO-RS computed solvation enthalpic (Hsol) and Gibbs free-energy (Gsol) corrections in Toluene solution; TPSS-D3/def2-TZVP and PW6B95-D3/def2-TZVP single-point energies (TPSS-D3 and PW6B95-D3); the total PW6B95-D3 free energies  $G_P$ ; the relative electronic energies ( $\Delta E_T$  and  $\Delta E_P$ ) and Gibbs free energies ( $\Delta G_T$  and  $\Delta G_P$ ) at the TPSS-D3 and PW6B95-D3 levels. See also main-text **Figures 3 and 6** for structures.

| Reactions                                                                                                                                                                                | Im               | ZPE      | Hc       | Gc       | Hsol     | Gsol     | TPSS-D3     | PW6B95-D3   | $G_P$       | $\Delta E_T$ | $\Delta E_P$ | $\Delta G_P$ | $\Delta G_T$ |
|------------------------------------------------------------------------------------------------------------------------------------------------------------------------------------------|------------------|----------|----------|----------|----------|----------|-------------|-------------|-------------|--------------|--------------|--------------|--------------|
| in Toluene                                                                                                                                                                               | $\text{cm}^{-1}$ | kcal/mol | kcal/mol | kcal/mol | kcal/mol | kcal/mol | $E_h$       | $E_h$       | $E_h$       | kcal/mol     | kcal/mol     | kcal/mol     | kcal/mol     |
| <i>Unstable adduct of <math>B(C_6F_5)_3</math> and reactant <math>(tBuO_2CN)_2</math> (R) may lose <math>CO_2</math> and alkene <math>CH_2=CMe_2</math> (tBe) to form a new N-H bond</i> |                  |          |          |          |          |          |             |             |             |              |              |              |              |
| $B(C_6F_5)_3 + R$                                                                                                                                                                        | 0                | 268.93   | 300.30   | 207.32   | -33.47   | -23.82   | -3012.26865 | -3015.32754 | -3015.02910 | 0.00         | 0.00         | 0.00         | 0.00         |
| <b>A</b>                                                                                                                                                                                 | 0                | 270.63   | 301.96   | 224.82   | -26.95   | -20.10   | -3012.29353 | -3015.35330 | -3015.02404 | -15.61       | -16.17       | 3.17         | 3.73         |
| <i><math>(tBuO_2CN)_2</math> (R) reacts easily with the <math>B(C_6F_5)_3</math>/TMP frustrated Lewis pair (FLP) via tBu group deprotonation</i>                                         |                  |          |          |          |          |          |             |             |             |              |              |              |              |
| $R + B(C_6F_5)_3 + TMP$                                                                                                                                                                  | 0                | 435.84   | 474.78   | 352.59   | -44.01   | -30.76   | -3421.67597 | -3425.16327 | -3424.64138 | 0.00         | 0.00         | 0.00         | 0.00         |
| <b>TS1</b>                                                                                                                                                                               | 684i             | 432.86   | 473.21   | 378.00   | -44.28   | -34.78   | -3421.68162 | -3425.16448 | -3424.61450 | -3.55        | -0.76        | 16.87        | 14.08        |
| $B^{\ominus} + TMPH^+ + tBe$                                                                                                                                                             | 0                | 435.63   | 475.17   | 353.58   | -113.48  | -98.50   | -3421.59787 | -3425.08892 | -3424.67339 | 49.01        | 46.66        | -20.09       | -17.74       |
| <i>..TMPH<sup>+</sup> cation is not bound to anion <math>B^{\ominus}</math> in solution</i>                                                                                              |                  |          |          |          |          |          |             |             |             |              |              |              |              |
| $B^{\ominus} + TMPH^+$                                                                                                                                                                   | 0                | 368.99   | 404.61   | 303.62   | -108.58  | -96.05   | -3264.27809 | -3267.60551 | -3267.26870 | 0.00         | 0.00         | 0.00         | 0.00         |
| $B^{\ominus} \cdot TMPH^+$                                                                                                                                                               | 0                | 371.82   | 407.06   | 323.00   | -36.74   | -28.68   | -3264.41225 | -3267.73955 | -3267.26752 | -84.18       | -84.12       | 0.74         | 0.67         |
| <i>Further reaction with the <math>B(C_6F_5)_3</math> / TMP FLP leads to the salt product <b>3</b></i>                                                                                   |                  |          |          |          |          |          |             |             |             |              |              |              |              |
| $B^{\ominus} + B(C_6F_5)_3$                                                                                                                                                              | 0                | 287.40   | 334.46   | 209.59   | -72.74   | -60.61   | -5063.98669 | -5069.13787 | -5068.89444 | 0.00         | 0.00         | -20.09       | 0.00         |
| <b>C<sup>⊖</sup></b>                                                                                                                                                                     | 0                | 289.55   | 336.26   | 229.58   | -59.98   | -51.10   | -5064.02193 | -5069.17506 | -5068.88762 | -22.11       | -23.33       | -15.81       | 5.50         |
| $B^{\ominus} + B(C_6F_5)_3 + TMP$                                                                                                                                                        | 0                | 454.31   | 508.94   | 354.86   | -83.27   | -67.55   | -5473.39400 | -5478.97361 | -5478.50672 | 0.00         | 0.00         | -20.09       | 0.00         |
| <b>TS2<sup>⊖</sup></b>                                                                                                                                                                   | 738i             | 452.46   | 508.02   | 383.17   | -70.91   | -60.34   | -5473.41921 | -5478.99567 | -5478.47821 | -15.82       | -13.85       | -2.20        | 15.92        |
| $D^{\ominus} + tBe$                                                                                                                                                                      | 0                | 456.22   | 511.50   | 375.12   | -70.77   | -58.58   | -5473.46101 | -5479.04567 | -5478.53520 | -42.05       | -45.22       | -37.96       | -14.70       |
| <i>..now the TMPH<sup>+</sup> cation is 0.6 kcal/mol bound to the anion <math>D^{\ominus}</math></i>                                                                                     |                  |          |          |          |          |          |             |             |             |              |              |              |              |
| $D^{\ominus} + TMPH^+$                                                                                                                                                                   | 0                | 565.73   | 624.79   | 479.53   | -118.48  | -103.78  | -5725.94307 | -5731.78837 | -5731.18356 | 0.00         | 0.00         | -37.96       | 0.00         |
| <b>3</b>                                                                                                                                                                                 | 0                | 567.58   | 626.78   | 497.36   | -50.93   | -40.43   | -5726.06959 | -5731.91565 | -5731.18448 | -79.39       | -79.87       | -38.54       | -0.10        |
| <i><math>P(o-Tol)_3/B(C_6F_5)_3</math> is a true FLP</i>                                                                                                                                 |                  |          |          |          |          |          |             |             |             |              |              |              |              |
| $P(o-Tol)_3 + B(C_6F_5)_3$                                                                                                                                                               | 0                | 315.45   | 348.12   | 252.36   | -38.96   | -28.09   | -3364.29595 | -3367.69030 | -3367.32688 | 0.00         | 0.00         | 0.00         | 0.00         |
| $B(C_6F_5)_3 \cdot P(o-Tol)_3$                                                                                                                                                           | 0                | 317.44   | 350.07   | 270.83   | -31.20   | -23.93   | -3364.32211 | -3367.71600 | -3367.31952 | -16.42       | -16.12       | 4.62         | 4.33         |
| <i>Unstable adduct of <math>B(C_6F_5)_3</math> and R may lose <math>CO_2</math> and alkene tBe to form a new N-H bond</i>                                                                |                  |          |          |          |          |          |             |             |             |              |              |              |              |
| $B(C_6F_5)_3 + R$                                                                                                                                                                        | 0                | 268.93   | 300.30   | 207.32   | -33.47   | -23.82   | -3012.26865 | -3015.32754 | -3015.02910 | 0.00         | 0.00         | 0.00         | 0.00         |

|                                                                                                                                             |       |        |        |        |        |        |             |             |             |        |        |               |        |
|---------------------------------------------------------------------------------------------------------------------------------------------|-------|--------|--------|--------|--------|--------|-------------|-------------|-------------|--------|--------|---------------|--------|
| <b>A</b>                                                                                                                                    | 0     | 270.63 | 301.96 | 224.82 | -26.95 | -20.10 | -3012.29353 | -3015.35330 | -3015.02404 | -15.61 | -16.17 | <b>3.17</b>   | 3.73   |
| <b>TS3</b>                                                                                                                                  | 806i  | 264.01 | 296.40 | 215.85 | -34.94 | -26.79 | -3012.25049 | -3015.30300 | -3014.99869 | 11.40  | 15.40  | <b>19.08</b>  | 15.08  |
| <b>E + CO<sub>2</sub> + tBe</b>                                                                                                             | 0     | 267.19 | 299.09 | 196.55 | -33.20 | -21.75 | -3012.29908 | -3015.35736 | -3015.06975 | -19.09 | -18.72 | <b>-25.51</b> | -25.89 |
| <i>..followed by trapping with weak base P(o-Tol)<sub>3</sub> to form the adduct 4</i>                                                      |       |        |        |        |        |        |             |             |             |        |        |               |        |
| <b>E + P(o-Tol)<sub>3</sub></b>                                                                                                             | 0     | 414.25 | 453.50 | 344.45 | -47.04 | -34.37 | -3821.06915 | -3824.92223 | -3824.42206 | 0.00   | 0.00   | <b>-25.51</b> | 0.00   |
| <b>TS4</b>                                                                                                                                  | 0     | 414.68 | 454.66 | 360.87 | -37.41 | -28.61 | -3821.08570 | -3824.93210 | -3824.39959 | -10.39 | -6.19  | <b>-11.41</b> | 9.91   |
| <b>4</b>                                                                                                                                    | 0     | 416.30 | 455.37 | 364.43 | -41.09 | -32.33 | -3821.12333 | -3824.98638 | -3824.45413 | -34.00 | -40.25 | <b>-45.63</b> | -13.87 |
| <i>..With Direct tBe elimination from ester group of 4 is kinetically slow over a sizeable barrier of 28.5 kcal/mol</i>                     |       |        |        |        |        |        |             |             |             |        |        |               |        |
| <b>4</b>                                                                                                                                    | 0     | 416.30 | 455.37 | 364.43 | -41.09 | -32.33 | -3821.12333 | -3824.98638 | -3824.45413 | 0.00   | 0.00   | <b>0.00</b>   | 0.00   |
| <b>TS5a</b>                                                                                                                                 | 432i  | 411.55 | 450.98 | 358.66 | -41.61 | -32.65 | -3821.07759 | -3824.93120 | -3824.40865 | 28.70  | 34.63  | <b>28.54</b>  | 22.61  |
| <b>F</b>                                                                                                                                    | 0     | 413.65 | 453.14 | 347.87 | -58.58 | -38.68 | -3821.09099 | -3824.95569 | -3824.45694 | 20.29  | 19.26  | <b>-1.77</b>  | -0.73  |
| <i>B(C<sub>6</sub>F<sub>5</sub>)<sub>3</sub> catalyzed ester group decomposition of 4 is facile and exergonic to form carboxylic acid F</i> |       |        |        |        |        |        |             |             |             |        |        |               |        |
| <b>4 + B(C<sub>6</sub>F<sub>5</sub>)<sub>3</sub></b>                                                                                        | 0     | 510.87 | 569.08 | 424.77 | -57.85 | -44.55 | -6030.63377 | -6036.74486 | -6036.13293 | 0.00   | 0.00   | <b>0.00</b>   | 0.00   |
| <b>4·Bf<sub>3</sub></b>                                                                                                                     | 0     | 512.14 | 570.37 | 443.64 | -49.89 | -40.32 | -6030.62853 | -6036.74464 | -6036.09890 | 3.29   | 0.14   | <b>21.35</b>  | 24.50  |
| <b>TS5</b>                                                                                                                                  | 53i   | 508.37 | 567.10 | 438.97 | -56.24 | -45.96 | -6030.61075 | -6036.72671 | -6036.09741 | 14.45  | 11.39  | <b>22.29</b>  | 25.34  |
| <b>TS5h</b>                                                                                                                                 | 1188i | 506.60 | 565.23 | 437.36 | -52.82 | -42.70 | -6030.61805 | -6036.73184 | -6036.09991 | 9.86   | 8.17   | <b>20.72</b>  | 22.41  |
| <b>F·B(C<sub>6</sub>F<sub>5</sub>)<sub>3</sub> + tBe</b>                                                                                    | 0     | 509.30 | 567.88 | 426.83 | -58.05 | -45.57 | -6030.60927 | -6036.72634 | -6036.11275 | 15.37  | 11.62  | <b>12.67</b>  | 16.42  |
| <b>F + tBe + B(C<sub>6</sub>F<sub>5</sub>)<sub>3</sub></b>                                                                                  | 0     | 508.22 | 566.86 | 408.20 | -75.33 | -50.90 | -6030.60144 | -6036.71417 | -6036.13574 | 20.29  | 19.26  | <b>-1.77</b>  | -0.73  |
| <i>..Further CO<sub>2</sub> release via intramolecular proton transfer is very facile to form G</i>                                         |       |        |        |        |        |        |             |             |             |        |        |               |        |
| <b>F</b>                                                                                                                                    | 0     | 347.01 | 382.58 | 297.90 | -53.68 | -36.22 | -3663.77121 | -3667.47228 | -3667.05224 | 0.00   | 0.00   | <b>0.00</b>   | 0.00   |
| <b>TS6</b>                                                                                                                                  | 1083i | 344.82 | 380.02 | 295.91 | -38.96 | -30.45 | -3663.77531 | -3667.46997 | -3667.04392 | -2.57  | 1.45   | <b>5.22</b>   | 1.20   |
| <b>G·CO<sub>2</sub></b>                                                                                                                     | 0     | 347.40 | 382.76 | 298.40 | -39.51 | -30.87 | -3663.78201 | -3667.47588 | -3667.04653 | -6.77  | -2.26  | <b>3.59</b>   | -0.93  |
| <b>G + CO<sub>2</sub></b>                                                                                                                   | 0     | 346.05 | 382.16 | 285.15 | -39.74 | -28.64 | -3663.78335 | -3667.47700 | -3667.06220 | -7.62  | -2.96  | <b>-6.25</b>  | -10.90 |
| <i>..Intramolecular 1,2-H-shift is exergonic but kinetically unlikely due to very high barrier (TS8)</i>                                    |       |        |        |        |        |        |             |             |             |        |        |               |        |
| <b>TS8 + CO<sub>2</sub></b>                                                                                                                 | 1731i | 341.02 | 377.52 | 279.71 | -40.51 | -29.60 | -3663.71151 | -3667.40331 | -3666.99872 | 37.46  | 43.28  | <b>33.59</b>  | 27.77  |
| <b>5 + CO<sub>2</sub></b>                                                                                                                   | 0     | 345.28 | 381.51 | 284.25 | -42.94 | -31.50 | -3663.78622 | -3667.48267 | -3667.07387 | -9.41  | -6.52  | <b>-13.57</b> | -16.46 |
| <i>..which however can be efficiently catalyzed by F via the carboxylic acid group (TS7)</i>                                                |       |        |        |        |        |        |             |             |             |        |        |               |        |
| <b>G + F</b>                                                                                                                                | 0     | 685.89 | 755.31 | 588.88 | -89.95 | -64.07 | -7138.85891 | -7146.06574 | -7145.22337 | 0.00   | 0.00   | <b>0.00</b>   | 0.00   |
| <b>G·F</b>                                                                                                                                  | 0     | 685.95 | 755.48 | 607.64 | -59.59 | -48.24 | -7138.90038 | -7146.10543 | -7145.21095 | -26.02 | -24.91 | <b>7.79</b>   | 6.67   |
| <b>TS7</b>                                                                                                                                  | 1167i | 683.93 | 753.25 | 605.92 | -58.54 | -47.27 | -7138.89593 | -7146.10025 | -7145.20697 | -23.23 | -21.66 | <b>10.29</b>  | 8.72   |
| <b>5 + F</b>                                                                                                                                | 0     | 685.12 | 754.66 | 587.98 | -93.15 | -66.93 | -7138.86177 | -7146.07141 | -7145.23504 | -1.80  | -3.56  | <b>-7.32</b>  | -5.56  |

**Table S2.** TPSS-D3/def2-SVP + COSMO optimized Cartesian coordinates (in Å) in toluene solution. Each structure is labeled by a specific name (See also **Table S1** and main-text **Figures 3 and 6**), followed by the number of atoms, the total energy (in hartrees), and the detailed atomic coordinates (in double-column text list).

|                                    |   |            |            |            |
|------------------------------------|---|------------|------------|------------|
| <b>3</b> : salt product            | C | -4.1090926 | 1.0507993  | -1.2253144 |
| 136                                | C | -4.3615884 | -1.7109971 | -1.3758282 |
| Energy = -5719.553833172           | C | -6.5359737 | -0.7887223 | 0.8472686  |
| N 0.3264325 -0.0652732 -0.0049500  | C | -4.9632023 | 0.6752787  | 1.8253671  |
| N -0.5472880 -0.8285769 0.4516872  | C | -3.1063371 | 2.0262974  | -1.1491411 |
| C 1.5914208 0.0022133 0.6704332    | C | -5.2205524 | 1.4180577  | -2.0006035 |
| O 2.5167430 -0.4821423 -0.0781463  | C | -4.5368783 | -2.9691612 | -0.7771892 |
| O 1.7031181 0.6127435 1.7370952    | C | -4.1572524 | -1.7561005 | -2.7613173 |
| C -1.7448019 -0.7735284 -0.3839657 | C | -7.4141029 | -0.5834542 | 1.9231456  |
| O -2.8147517 -0.6333956 0.3176276  | C | -5.7901990 | 0.8916191  | 2.9318312  |
| O -1.6496179 -0.9094027 -1.6023581 | C | -3.1642786 | 3.2544011  | -1.8245571 |
| B 4.0259556 -0.1703655 0.1541223   | C | -5.3303954 | 2.6306428  | -2.6902603 |
| C 4.7949081 -0.9358802 -1.0737168  | C | -4.5438733 | -4.1802461 | -1.4834673 |
| C 4.0383033 1.4696246 0.0358826    | C | -4.1334769 | -2.9389624 | -3.5084213 |
| C 4.5532992 -0.8104689 1.5637385   | C | -7.0369088 | 0.2568101  | 2.9784963  |
| C 4.4009935 -2.2263910 -1.4583322  | C | -4.2848828 | 3.5602401  | -2.6024057 |
| C 5.8534464 -0.3934586 -1.8175889  | C | -4.3319114 | -4.1662070 | -2.8676530 |
| C 3.6603312 2.0530010 -1.1848029   | F | -6.9789407 | -1.6073297 | -0.1270108 |
| C 4.1670939 2.3764565 1.0954747    | F | -3.8003230 | 1.3711833  | 1.8097666  |
| C 5.8461247 -0.4961512 2.0098061   | F | -1.9716029 | 1.8277974  | -0.4273749 |
| C 3.8666352 -1.7389496 2.3580172   | F | -6.2535056 | 0.5558350  | -2.1161117 |
| C 4.9484010 -2.9101613 -2.5514668  | F | -4.6810623 | -3.0627304 | 0.5615214  |
| C 6.4527567 -1.0541452 -2.9000556  | F | -3.8854212 | -0.6340193 | -3.4760634 |
| C 3.4194663 3.4184939 -1.3655184   | F | -8.6121916 | -1.1868908 | 1.9513881  |
| C 3.9440718 3.7557402 0.9658824    | F | -5.3961451 | 1.7031168  | 3.9326482  |
| C 6.4138175 -1.0038166 3.1836610   | F | -2.1356190 | 4.1167530  | -1.7583933 |
| C 4.3948500 -2.2795623 3.5401755   | F | -6.4142621 | 2.9108591  | -3.4291012 |
| C 5.9912646 -2.3215191 -3.2755954  | F | -4.7277451 | -5.3468401 | -0.8473250 |
| C 3.5660594 4.2833503 -0.2734521   | F | -3.8621118 | -2.9000120 | -4.8301064 |
| C 5.6740798 -1.9041666 3.9617499   | F | -7.8597564 | 0.4512835  | 4.0175190  |
| F 3.4209872 -2.8716572 -0.7886310  | F | -4.3510173 | 4.7209506  | -3.2689374 |
| F 6.3319952 0.8372365 -1.5412694   | F | -4.3087648 | -5.3089615 | -3.5651216 |
| F 3.4757984 1.2737100 -2.2814658   | N | 0.6323917  | 1.3276952  | 4.1118887  |
| F 4.4836696 1.9606977 2.3416595    | C | 1.4136998  | 0.5370689  | 5.1769706  |
| F 6.6010368 0.3607343 1.2902812    | C | -0.9005385 | 1.4438819  | 4.1768517  |
| F 2.6217366 -2.1659971 2.0328274   | H | 0.9188517  | 0.9852944  | 3.1527314  |
| F 4.4723710 -4.1159166 -2.9114087  | C | 0.9136943  | 1.0134545  | 6.5537606  |
| F 7.4537091 -0.4790342 -3.5859024  | C | 1.2292725  | -0.9714651 | 4.9621877  |
| F 3.0349516 3.8987244 -2.5604357   | C | 2.8863265  | 0.9130985  | 4.9535599  |
| F 4.0652491 4.5677387 2.0300879    | C | -1.5590226 | 0.1175650  | 3.7748483  |
| F 7.6479068 -0.6437571 3.5680135   | C | -1.2585018 | 2.5415425  | 3.1631119  |
| F 3.6751527 -3.1442112 4.2793023   | C | -1.2662166 | 1.8714203  | 5.6107179  |
| F 6.5384236 -2.9613269 -4.3188281  | C | -0.6153522 | 0.9927646  | 6.6877057  |
| F 3.3392282 5.5960125 -0.4122449   | H | 1.2790814  | 2.0449238  | 6.7235028  |
| F 6.1884762 -2.4047531 5.0938492   | H | 1.3878067  | 0.3798087  | 7.3225339  |
| B -4.1662114 -0.3858023 -0.4265997 | H | 0.2450004  | -1.3334264 | 5.2905151  |
| C -5.2663999 -0.1983633 0.7719593  | H | 1.3755843  | -1.2455329 | 3.9062070  |

|                                                                                                                         |            |            |            |   |            |            |            |
|-------------------------------------------------------------------------------------------------------------------------|------------|------------|------------|---|------------|------------|------------|
| H                                                                                                                       | 1.9947542  | -1.4997671 | 5.5515348  | C | 0.5480946  | -1.3199384 | -0.5761300 |
| H                                                                                                                       | 3.0398999  | 2.0048556  | 5.0326592  | O | 1.3742819  | -0.4278734 | -0.3084662 |
| H                                                                                                                       | 3.5037247  | 0.4277488  | 5.7264867  | O | 0.6802945  | -2.3878883 | -1.3388049 |
| H                                                                                                                       | 3.2356532  | 0.5828911  | 3.9630397  | C | 1.6387514  | -2.6619930 | -2.4986256 |
| H                                                                                                                       | -1.1432128 | -0.2765946 | 2.8335191  | C | 1.5241555  | -1.4969692 | -3.4764665 |
| H                                                                                                                       | -1.4694123 | -0.6532367 | 4.5528460  | C | 3.0378452  | -2.8931273 | -1.9529977 |
| H                                                                                                                       | -2.6274681 | 0.3126947  | 3.6082108  | C | 1.0875870  | -3.9504120 | -3.1060481 |
| H                                                                                                                       | -0.7340048 | 3.4853476  | 3.4003665  | H | 0.5183064  | -1.4459301 | -3.9190846 |
| H                                                                                                                       | -1.0090934 | 2.2376997  | 2.1332398  | H | 1.7482610  | -0.5361771 | -2.9957477 |
| H                                                                                                                       | -2.3416904 | 2.7294010  | 3.2034479  | H | 2.2507195  | -1.6509713 | -4.2911949 |
| H                                                                                                                       | -0.9498498 | 2.9220523  | 5.7593490  | H | 3.6906022  | -3.1921239 | -2.7897516 |
| H                                                                                                                       | -2.3664649 | 1.8574780  | 5.6947519  | H | 3.4673665  | -1.9909647 | -1.5061876 |
| H                                                                                                                       | -0.9941793 | -0.0429610 | 6.6215997  | H | 3.0273074  | -3.7019443 | -1.2067604 |
| H                                                                                                                       | -0.9011822 | 1.3634506  | 7.6864555  | H | 1.2103072  | -4.7957944 | -2.4129641 |
| H                                                                                                                       | 0.9924120  | 2.2938322  | 4.1584209  | H | 0.0267129  | -3.8468842 | -3.3775382 |
| N                                                                                                                       | -0.7296402 | -0.5548007 | -4.1172142 | H | 1.6628739  | -4.1678873 | -4.0209964 |
| C                                                                                                                       | 0.3644861  | -1.6338564 | -4.2576372 | B | -2.0525521 | 0.9892153  | 0.2459767  |
| C                                                                                                                       | -0.4528432 | 0.9251246  | -4.4499050 | C | -3.3102953 | 1.2476633  | 1.3069193  |
| H                                                                                                                       | -1.0944937 | -0.6132899 | -3.1322366 | C | -1.1928021 | 2.4122671  | 0.4361344  |
| C                                                                                                                       | 1.0765620  | -1.4174036 | -5.6035867 | C | -2.5552511 | 0.7725421  | -1.3215441 |
| C                                                                                                                       | 1.3303180  | -1.5612229 | -3.0684042 | C | -3.5285704 | 0.5890248  | 2.5251224  |
| C                                                                                                                       | -0.3961353 | -2.9686475 | -4.2214529 | C | -4.1917815 | 2.3161086  | 1.0685539  |
| C                                                                                                                       | 0.2835122  | 1.5868020  | -3.2773326 | C | -0.7033682 | 2.6985575  | 1.7200099  |
| C                                                                                                                       | -1.8410053 | 1.5583769  | -4.6232448 | C | -1.0469327 | 3.4649602  | -0.4772088 |
| C                                                                                                                       | 0.3436556  | 0.9808870  | -5.7669405 | C | -1.6052639 | 0.7386361  | -2.3539558 |
| C                                                                                                                       | 1.5460579  | 0.0300549  | -5.7986787 | C | -3.8759939 | 0.6819730  | -1.7949009 |
| H                                                                                                                       | 0.3882846  | -1.6921898 | -6.4262956 | C | -4.5874346 | 0.8918188  | 3.3935096  |
| H                                                                                                                       | 1.9247470  | -2.1217955 | -5.6498495 | F | -2.7337887 | -0.4250612 | 2.9456255  |
| H                                                                                                                       | 2.0093073  | -0.6988947 | -3.1076968 | C | -5.2584423 | 2.6644502  | 1.9032271  |
| H                                                                                                                       | 0.7805607  | -1.5177455 | -2.1176621 | F | -4.0448181 | 3.0613052  | -0.0518968 |
| H                                                                                                                       | 1.9438280  | -2.4754462 | -3.0648903 | C | -0.1387312 | 3.9190179  | 2.0991296  |
| H                                                                                                                       | -1.1542305 | -3.0286030 | -5.0224783 | F | -0.8202223 | 1.7665054  | 2.7064721  |
| H                                                                                                                       | 0.3166496  | -3.7968032 | -4.3623445 | C | -0.4258403 | 4.6845648  | -0.1668572 |
| H                                                                                                                       | -0.8985046 | -3.1054198 | -3.2486119 | F | -1.5111638 | 3.3706847  | -1.7427466 |
| H                                                                                                                       | -0.2322149 | 1.3982089  | -2.3224601 | C | -1.8949697 | 0.6569481  | -3.7176052 |
| H                                                                                                                       | 1.3245348  | 1.2527413  | -3.1804818 | F | -0.2903866 | 0.7800426  | -2.0472123 |
| H                                                                                                                       | 0.2992471  | 2.6754355  | -3.4484155 | C | -4.2285782 | 0.5766538  | -3.1503008 |
| H                                                                                                                       | -2.3934035 | 1.0910638  | -5.4579636 | F | -4.9349336 | 0.6665893  | -0.9535210 |
| H                                                                                                                       | -2.4398326 | 1.4556668  | -3.7056480 | C | -5.4616025 | 1.9367710  | 3.0833847  |
| H                                                                                                                       | -1.7267454 | 2.6313050  | -4.8454988 | F | -4.7751291 | 0.1703021  | 4.5139641  |
| H                                                                                                                       | -0.3358224 | 0.7269260  | -6.6032904 | F | -6.0784334 | 3.6825624  | 1.5935029  |
| H                                                                                                                       | 0.6582377  | 2.0270882  | -5.9211145 | C | 0.0393074  | 4.9137136  | 1.1308462  |
| H                                                                                                                       | 2.2818830  | 0.3077615  | -5.0226731 | F | 0.2253625  | 4.1520204  | 3.3737717  |
| H                                                                                                                       | 2.0630015  | 0.1240921  | -6.7683150 | F | -0.2789446 | 5.6326819  | -1.1060170 |
| H                                                                                                                       | -1.5173117 | -0.8503975 | -4.7140278 | C | -3.2284870 | 0.5604597  | -4.1243147 |
| <b>4·B(C<sub>6</sub>F<sub>5</sub>)<sub>3</sub> : unstable adduct of 4 and B(C<sub>6</sub>F<sub>5</sub>)<sub>3</sub></b> |            |            |            |   |            |            |            |
| 130                                                                                                                     |            |            |            |   |            |            |            |
| Energy = -6024.069176836                                                                                                |            |            |            |   |            |            |            |
| N                                                                                                                       | -1.1742299 | -0.2275020 | 0.7101061  | F | -5.5155249 | 0.4637553  | -3.5095091 |
| N                                                                                                                       | -0.7485522 | -1.2889432 | -0.0310110 | F | -6.4805941 | 2.2386959  | 3.9019834  |
| H                                                                                                                       | -0.7436778 | -0.1919265 | 1.6339813  | F | 0.6288809  | 6.0729061  | 1.4540307  |
|                                                                                                                         |            |            |            | F | -3.5331613 | 0.4073490  | -5.4199608 |
|                                                                                                                         |            |            |            | P | -1.5854473 | -2.9175456 | 0.0705156  |
|                                                                                                                         |            |            |            | C | -2.2585178 | -3.3716705 | -1.5603003 |

|   |            |            |            |                                                                                                                                     |            |            |            |
|---|------------|------------|------------|-------------------------------------------------------------------------------------------------------------------------------------|------------|------------|------------|
| C | -3.0734502 | -2.7160520 | 1.0897051  | F                                                                                                                                   | 1.4593657  | 2.5242749  | -1.3364563 |
| C | -0.4145213 | -4.1483052 | 0.6858271  | C                                                                                                                                   | 4.3176944  | 0.8954323  | -3.7873598 |
| C | -2.0111666 | -2.5135779 | -2.6464617 | F                                                                                                                                   | 5.0368784  | -0.5346223 | -2.1015594 |
| C | -3.1272448 | -4.4889222 | -1.7071851 | C                                                                                                                                   | 2.1966085  | 1.8425661  | 3.4554638  |
| C | -3.4600172 | -3.4519250 | 2.2485099  | F                                                                                                                                   | 1.5811192  | -0.1706401 | 2.4419699  |
| C | -3.9778370 | -1.8043700 | 0.4989823  | C                                                                                                                                   | 3.2937316  | 3.5529673  | 2.1518698  |
| C | -0.1223226 | -5.2634710 | -0.1291746 | F                                                                                                                                   | 3.7908573  | 3.2150137  | -0.0923971 |
| C | 0.2238516  | -3.9731343 | 1.9403329  | C                                                                                                                                   | 4.6292530  | -2.7670663 | 1.7286896  |
| C | -2.5877981 | -2.7517726 | -3.8972001 | F                                                                                                                                   | 2.4401135  | -2.5627251 | 0.9603171  |
| H | -1.3632738 | -1.6518927 | -2.5000866 | C                                                                                                                                   | 6.2294987  | -0.9975821 | 1.3600939  |
| C | -3.6756170 | -4.7173374 | -2.9842922 | F                                                                                                                                   | 5.5704296  | 0.9542115  | 0.2516355  |
| C | -3.5299917 | -5.3997716 | -0.5719191 | C                                                                                                                                   | 3.4572816  | 1.8857464  | -4.2738021 |
| C | -4.7193199 | -3.1466985 | 2.8028202  | F                                                                                                                                   | 1.6591647  | 3.3829542  | -3.8678692 |
| C | -2.6942952 | -4.5699626 | 2.9186420  | F                                                                                                                                   | 5.2686115  | 0.3842383  | -4.5844124 |
| C | -5.2283406 | -1.5486843 | 1.0608667  | C                                                                                                                                   | 2.7964087  | 3.1053272  | 3.3797643  |
| H | -3.6904840 | -1.2955078 | -0.4225347 | F                                                                                                                                   | 1.6841905  | 1.4049717  | 4.6132863  |
| C | 0.8003013  | -6.2216949 | 0.2943998  | F                                                                                                                                   | 3.8480334  | 4.7702196  | 2.0614102  |
| H | -0.6229011 | -5.3724147 | -1.0949939 | C                                                                                                                                   | 5.9248750  | -2.2634425 | 1.8798489  |
| C | 1.1483646  | -4.9557917 | 2.3387507  | F                                                                                                                                   | 4.3152250  | -3.9824369 | 2.2110735  |
| C | -0.0149118 | -2.7842025 | 2.8350046  | F                                                                                                                                   | 7.4658016  | -0.4999535 | 1.4962939  |
| C | -3.4184569 | -3.8669734 | -4.0664216 | F                                                                                                                                   | 3.5809671  | 2.3287260  | -5.5293059 |
| H | -2.3886120 | -2.0722892 | -4.7306187 | F                                                                                                                                   | 2.8637277  | 3.8867859  | 4.4610532  |
| H | -4.3333627 | -5.5823697 | -3.1214319 | F                                                                                                                                   | 6.8641737  | -2.9831032 | 2.5046429  |
| H | -4.4202319 | -4.9942485 | -0.0575731 |                                                                                                                                     |            |            |            |
| H | -3.7868988 | -6.4005186 | -0.9547942 |                                                                                                                                     |            |            |            |
| H | -2.7398550 | -5.5172041 | 0.1852657  | <b>4</b> : B(C <sub>6</sub> F <sub>5</sub> ) <sub>3</sub> / P( <i>o</i> -Tol) <sub>3</sub> adduct of <i>t</i> BuO <sub>2</sub> CNNH |            |            |            |
| C | -5.5886260 | -2.2080162 | 2.2409657  | 96                                                                                                                                  |            |            |            |
| H | -5.0297733 | -3.6943890 | 3.6989200  | Energy = -3817.111237830                                                                                                            |            |            |            |
| H | -3.4100130 | -5.2661053 | 3.3840178  | N                                                                                                                                   | -0.0958316 | 0.0442704  | 0.8491552  |
| H | -2.0619308 | -5.1423590 | 2.2273563  | N                                                                                                                                   | 1.1626211  | 0.4293044  | 0.4334333  |
| H | -2.0463281 | -4.1860273 | 3.7241664  | H                                                                                                                                   | -0.2159817 | 0.2238156  | 1.8456844  |
| H | -5.8957856 | -0.8279061 | 0.5854389  | C                                                                                                                                   | 1.5338053  | 1.8024258  | 0.5100548  |
| C | 1.4400772  | -6.0613050 | 1.5338474  | O                                                                                                                                   | 0.8613929  | 2.6491640  | 1.0571533  |
| H | 1.0212556  | -7.0856768 | -0.3393970 | O                                                                                                                                   | 2.7159317  | 1.9528719  | -0.1101589 |
| H | 1.6624735  | -4.8332555 | 3.2971288  | C                                                                                                                                   | 3.3804004  | 3.2867769  | -0.2157272 |
| H | -0.1159600 | -3.1033798 | 3.8851190  | C                                                                                                                                   | 4.6549025  | 2.9603287  | -0.9960768 |
| H | 0.8481179  | -2.1054452 | 2.7866879  | C                                                                                                                                   | 2.4635261  | 4.2257538  | -1.0056054 |
| H | -0.9145359 | -2.2056833 | 2.5689463  | C                                                                                                                                   | 3.6974681  | 3.7982881  | 1.1917046  |
| H | -3.8729711 | -4.0731164 | -5.0404585 | H                                                                                                                                   | 4.4082376  | 2.5246152  | -1.9782535 |
| H | -6.5550660 | -2.0090791 | 2.7141480  | H                                                                                                                                   | 5.2356924  | 3.8837771  | -1.1561476 |
| H | 2.1731420  | -6.8001564 | 1.8724640  | H                                                                                                                                   | 5.2783940  | 2.2441523  | -0.4367965 |
| B | 2.8293145  | 0.3122114  | -0.1222275 | H                                                                                                                                   | 2.9916062  | 5.1780325  | -1.1836981 |
| C | 3.1731243  | 0.8996483  | -1.5980283 | H                                                                                                                                   | 2.2022390  | 3.7792765  | -1.9789576 |
| C | 2.6488469  | 1.4379122  | 1.0503622  | H                                                                                                                                   | 1.5363938  | 4.4286380  | -0.4494505 |
| C | 3.9150116  | -0.7317078 | 0.5227115  | H                                                                                                                                   | 4.2799332  | 4.7322531  | 1.1150154  |
| C | 2.3761469  | 1.9347454  | -2.1197452 | H                                                                                                                                   | 2.7726586  | 4.0029104  | 1.7515139  |
| C | 4.1682292  | 0.4340871  | -2.4716822 | H                                                                                                                                   | 4.2990245  | 3.0554434  | 1.7415532  |
| C | 2.1398473  | 1.0594905  | 2.3006175  | B                                                                                                                                   | -1.3874051 | 0.1890802  | -0.0051043 |
| C | 3.2251799  | 2.7194645  | 1.0251628  | C                                                                                                                                   | -2.4691978 | -0.9451071 | 0.5400300  |
| C | 3.6641329  | -1.9921123 | 1.0724569  | C                                                                                                                                   | -2.1443695 | 1.6535513  | 0.2618907  |
| C | 5.2279409  | -0.2652553 | 0.7132699  | C                                                                                                                                   | -0.9572940 | -0.0248413 | -1.5894078 |
| C | 2.4716398  | 2.4142279  | -3.4297227 | C                                                                                                                                   | -2.3279460 | -1.7648536 | 1.6699009  |
|   |            |            |            | C                                                                                                                                   | -3.6836198 | -1.1117112 | -0.1447489 |

C -2.2479307 2.1324519 1.5764350  
 C -2.7603481 2.4723195 -0.6954804  
 C -0.2791328 0.9901836 -2.2804715  
 C -1.1420781 -1.1903240 -2.3494353  
 C -3.2735797 -2.7318033 2.0461622  
 F -1.2492797 -1.6949887 2.4891110  
 C -4.6626373 -2.0504201 0.1968636  
 F -3.9310759 -0.3615438 -1.2428440  
 C -2.8498064 3.3437274 1.9332220  
 F -1.7564176 1.3993659 2.6138035  
 C -3.3784523 3.6949594 -0.3933546  
 F -2.7840098 2.1251259 -2.0032032  
 C 0.1773775 0.8885265 -3.5972485  
 F -0.0013509 2.1641438 -1.6655565  
 C -0.7006947 -1.3491327 -3.6732179  
 F -1.7566439 -2.2804254 -1.8297261  
 C -4.4523270 -2.8751753 1.3094895  
 F -3.0490633 -3.5212140 3.1139016  
 F -5.7907864 -2.1718270 -0.5236962  
 C -3.4242001 4.1360333 0.9328287  
 F -2.8965869 3.7434708 3.2170521  
 F -3.9357336 4.4415142 -1.3641364  
 C -0.0206780 -0.3023717 -4.3009752  
 F 0.8947523 1.8860091 -4.1531598  
 F -0.8956623 -2.5077357 -4.3234138  
 F -5.3689451 -3.7906351 1.6612931  
 F -4.0129430 5.3022685 1.2434739  
 F 0.4632429 -0.4449450 -5.5435019  
 P 2.4519332 -0.7632462 0.5365366  
 C 1.6401861 -2.2879396 1.0744890  
 C 3.7054012 -0.1165768 1.6723702  
 C 3.1667338 -1.0986063 -1.1009039  
 C 0.6387274 -2.6864979 0.1597990  
 C 1.9049839 -3.0605773 2.2372805  
 C 3.3235813 0.3845873 2.9463469  
 C 5.0449962 -0.0591926 1.2392032  
 C 2.8432753 -0.2209294 -2.1529607  
 C 3.9711784 -2.2489051 -1.3368545  
 C -0.1502055 -3.8113131 0.3989529  
 H 0.4821170 -2.1001587 -0.7481447  
 C 1.0792465 -4.1829469 2.4549956  
 C 3.0133812 -2.8074907 3.2346696  
 C 4.3430592 0.9060484 3.7637719  
 C 1.8943972 0.3981729 3.4403574  
 C 6.0349121 0.4670615 2.0748337  
 H 5.3050981 -0.4174458 0.2384132  
 C 3.2988426 -0.4660026 -3.4520601  
 H 2.2396174 0.6594620 -1.9400773  
 C 4.4246562 -2.4618017 -2.6521245  
 C 4.3357686 -3.2470790 -0.2630597  
 C 0.0574753 -4.5477859 1.5723836  
 H -0.9265514 -4.0877184 -0.3177979

H 1.2614913 -4.7915560 3.3472388  
 H 2.7187884 -2.0639369 3.9948453  
 H 3.2456374 -3.7427658 3.7682562  
 H 3.9376431 -2.4417778 2.7627033  
 C 5.6791414 0.9475054 3.3432865  
 H 4.0756604 1.2904142 4.7538660  
 H 1.8705927 0.3962982 4.5415393  
 H 1.3688003 1.3096964 3.1008130  
 H 1.3117354 -0.4690282 3.0856200  
 H 7.0742230 0.5054504 1.7353176  
 C 4.0915270 -1.5934482 -3.7001437  
 H 3.0258147 0.2177830 -4.2606900  
 H 5.0501791 -3.3381543 -2.8537419  
 H 4.5533994 -2.7630037 0.7035542  
 H 3.5090421 -3.9595315 -0.0924260  
 H 5.2258021 -3.8232366 -0.5622104  
 H -0.5656613 -5.4198145 1.7941190  
 H 6.4437247 1.3622245 4.0079211  
 H 4.4548530 -1.7995625 -4.7120046

**5** : B(C<sub>6</sub>F<sub>5</sub>)<sub>3</sub> / P(*o*-Tol)<sub>3</sub> FLP adduct of HN=NH  
 81

Energy = -3471.445256266

N 2.9141420 -1.0011085 -0.8438295  
 N 1.5804414 -1.5089567 -0.8153609  
 H 3.3157482 -1.1781724 -1.7697484  
 H 0.8526408 -0.9873032 -1.3296898  
 B 3.0275901 0.4961736 -0.4401290  
 C 4.5923016 0.9815017 -0.6126226  
 C 2.1608803 1.4744712 -1.4847882  
 C 2.4764328 0.5155953 1.1159087  
 C 5.6215306 0.2745943 -1.2497631  
 C 4.9580326 2.2582292 -0.1572345  
 C 2.2155649 1.2285178 -2.8655396  
 C 1.3972248 2.6010835 -1.1357178  
 C 1.1095781 0.4319433 1.4188670  
 C 3.3235286 0.3170277 2.2176284  
 C 6.9208714 0.7799468 -1.4142240  
 F 5.4225575 -0.9663825 -1.7611925  
 C 6.2394433 2.8039623 -0.2901930  
 F 4.0396777 3.0251644 0.4715475  
 C 1.5233748 1.9657267 -3.8342056  
 F 2.9912505 0.2189197 -3.3555662  
 C 0.6985073 3.3842517 -2.0667362  
 F 1.2865467 2.9939984 0.1489534  
 C 0.5992335 0.1656715 2.6949277  
 F 0.1726700 0.5836743 0.4447340  
 C 2.8611175 0.0487557 3.5145881  
 F 4.6658901 0.3019571 2.0698659  
 C 7.2338108 2.0538242 -0.9307213  
 F 7.8644056 0.0499262 -2.0352122  
 F 6.5239356 4.0289385 0.1829206



C 0.7552398 3.0620383 -3.4282401  
 F 1.6006107 1.6336628 -5.1363222  
 F -0.0260479 4.4420352 -1.6666417  
 C 1.4868538 -0.0403579 3.7563222  
 F -0.7271588 0.0649892 2.9001225  
 F 3.7293977 -0.1952215 4.5143740  
 F 8.4711035 2.5514483 -1.0780623  
 F 0.0860858 3.7954309 -4.3291922  
 F 1.0286902 -0.3280966 4.9829834  
 P 1.5649648 -3.1774464 -0.9582928  
 C 2.1509062 -3.8874524 0.6050013  
 C 2.6913989 -3.6448329 -2.3064336  
 C -0.1356925 -3.7085068 -1.2801627  
 C 2.6575265 -2.9910480 1.5667985  
 C 2.0569744 -5.2788524 0.8763258  
 C 2.5206662 -3.1278251 -3.6219980  
 C 3.8702165 -4.3408994 -1.9580390  
 C -0.3681223 -4.5525131 -2.3875524  
 C -1.1923554 -3.3616032 -0.3929393  
 C 3.0811351 -3.4593195 2.8138071  
 H 2.7243469 -1.9318559 1.3139807  
 C 2.4968050 -5.7188134 2.1397665  
 C 1.4939971 -6.2807041 -0.1057074  
 C 3.5506292 -3.3687896 -4.5520294  
 C 1.3138395 -2.3397174 -4.0840324  
 C 4.8695400 -4.5693766 -2.9059631  
 H 4.0099321 -4.6836522 -0.9284005  
 C -1.6491019 -5.0433082 -2.6505478  
 H 0.4666955 -4.8373573 -3.0350420  
 C -2.4718197 -3.8729962 -0.6870091  
 C -1.0082965 -2.4758125 0.8149740  
 C 3.0004798 -4.8295123 3.0984809  
 H 3.4773932 -2.7529539 3.5493494  
 H 2.4382164 -6.7880299 2.3709381  
 H 0.3900404 -6.2391499 -0.1231085  
 H 1.8439551 -6.0982882 -1.1358041  
 H 1.7894389 -7.3032681 0.1779680  
 C 4.7052859 -4.0803208 -4.2096053  
 H 3.4415068 -2.9719213 -5.5671812  
 H 0.6673500 -2.9619371 -4.7283687  
 H 0.6904410 -1.9784912 -3.2537044  
 H 1.6349494 -1.4656729 -4.6722671  
 H 5.7781188 -5.1087741 -2.6230994  
 C -2.7050386 -4.6956466 -1.7956909  
 H -1.8186607 -5.6971357 -3.5112157  
 H -3.3010091 -3.6186845 -0.0181906  
 H -1.8375280 -2.6177603 1.5253124  
 H -0.0610682 -2.6809473 1.3393210  
 H -0.9917298 -1.4115550 0.5290897  
 H 3.3328517 -5.2107902 4.0694352  
 H 5.4869144 -4.2391669 -4.9594101  
 H -3.7143024 -5.0743098 -1.9869082

An : less stable B(C<sub>6</sub>F<sub>5</sub>)<sub>3</sub> adduct of R at N-atom  
68

Energy = -3008.855897971

N 0.2327451 -0.7063493 -1.3609958  
 N -0.6997089 -0.8792775 -2.1663926  
 C 1.4977417 -1.3799271 -1.8689486  
 O 2.4452767 -0.6905752 -2.1428718  
 O 1.2791777 -2.6607415 -1.9508971  
 C -1.9941946 -0.2335549 -2.0614095  
 O -2.3173879 0.5374971 -2.9392351  
 O -2.6863117 -0.7915977 -1.0922852  
 C 2.3479558 -3.6102487 -2.4628869  
 C 2.5941867 -3.2756163 -3.9341981  
 C 3.6017046 -3.4749579 -1.5970900  
 C 1.6661831 -4.9635663 -2.2766696  
 H 1.6499884 -3.3129606 -4.5026536  
 H 3.0478393 -2.2783561 -4.0454138  
 H 3.2860266 -4.0225864 -4.3585017  
 H 3.3655330 -3.6345663 -0.5339608  
 H 4.3254086 -4.2438518 -1.9159117  
 H 4.0694798 -2.4860791 -1.7167849  
 H 2.3455771 -5.7658319 -2.6084152  
 H 1.4178102 -5.1228847 -1.2147199  
 H 0.7386411 -5.0153719 -2.8699377  
 C -4.2028696 -0.8527870 -1.0871258  
 C -4.7936069 0.5568530 -1.1119511  
 C -4.6059383 -1.6858518 -2.3040206  
 C -4.4766031 -1.5674657 0.2342235  
 H -4.4454307 1.1451807 -0.2511204  
 H -4.5369616 1.0825215 -2.0433125  
 H -5.8914578 0.4695196 -1.0447874  
 H -4.1162530 -2.6733923 -2.2757779  
 H -5.6984352 -1.8362282 -2.2928469  
 H -4.3389197 -1.1718477 -3.2418532  
 H -5.5620383 -1.7205984 0.3514786  
 H -3.9727403 -2.5473014 0.2587394  
 H -4.1104321 -0.9590923 1.0767543  
 B 0.2130451 0.2173936 0.0400529  
 C -0.5131307 -0.6664606 1.2127183  
 C 1.7552865 0.4649507 0.5228211  
 C -0.5993052 1.5503519 -0.4339561  
 C -0.9890085 -1.9810522 1.1433584  
 C -0.6063045 -0.0644017 2.4784314  
 C 2.5509689 -0.6392627 0.8626542  
 C 2.3585753 1.7101740 0.7581001  
 C -0.0899829 2.2859078 -1.5201103  
 C -1.8079098 2.0352234 0.0896946  
 C -1.5817479 -2.6378008 2.2304857  
 C -1.1819785 -0.6833532 3.5928552  
 C 3.8644044 -0.5608806 1.3297109  
 C 3.6692058 1.8452951 1.2421843

|   |            |            |            |
|---|------------|------------|------------|
| C | -0.7087969 | 3.4133879  | -2.0632510 |
| C | -2.4620881 | 3.1660859  | -0.4185460 |
| C | -1.6800885 | -1.9871103 | 3.4644624  |
| C | 4.4288367  | 0.7053363  | 1.5292737  |
| C | -1.9185613 | 3.8522108  | -1.5089304 |
| F | -0.9026341 | -2.6974860 | 0.0025322  |
| F | -0.1536371 | 1.1963901  | 2.6460166  |
| F | 2.0444884  | -1.8892341 | 0.6896092  |
| F | 1.6968818  | 2.8627999  | 0.5443995  |
| F | 1.0583547  | 1.8821903  | -2.0997802 |
| F | -2.4457828 | 1.4113865  | 1.1021339  |
| F | -2.0649867 | -3.8829240 | 2.0859096  |
| F | -1.2606640 | -0.0476503 | 4.7704661  |
| F | 4.5736170  | -1.6709461 | 1.5855409  |
| F | 4.1947298  | 3.0613533  | 1.4443105  |
| F | -0.1738526 | 4.0620042  | -3.1047958 |
| F | -3.6288115 | 3.5668883  | 0.1100510  |
| F | -2.2417840 | -2.6027433 | 4.5120010  |
| F | 5.6806674  | 0.8238002  | 1.9842743  |
| F | -2.5425388 | 4.9206896  | -2.0115251 |

**A** : B(C<sub>6</sub>F<sub>5</sub>)<sub>3</sub> adduct of **R** at an ester C=O

68

Energy = -3008.850882321

|   |            |            |            |
|---|------------|------------|------------|
| N | -1.7254194 | -0.7755896 | 1.3602775  |
| N | -2.6343084 | -1.6207012 | 1.2310274  |
| C | -0.5523988 | -1.1612081 | 2.0458292  |
| O | -0.2272727 | -0.6270626 | 3.1344682  |
| O | 0.2044300  | -1.9536455 | 1.3688164  |
| C | -3.7366891 | -1.1858116 | 0.3934125  |
| O | -3.7277131 | -1.4658161 | -0.7856331 |
| O | -4.6553662 | -0.6207809 | 1.1466026  |
| C | 1.6406388  | -2.3334499 | 1.7812724  |
| C | 2.4598575  | -1.0530221 | 1.9357805  |
| C | 1.5423870  | -3.1641089 | 3.0577532  |
| C | 2.0798241  | -3.1594743 | 0.5762584  |
| H | 2.3659294  | -0.4167142 | 1.0404581  |
| H | 2.1619172  | -0.4758857 | 2.8225232  |
| H | 3.5193090  | -1.3401444 | 2.0439532  |
| H | 0.8455922  | -4.0066940 | 2.9186873  |
| H | 2.5424597  | -3.5741515 | 3.2790380  |
| H | 1.2186024  | -2.5557949 | 3.9134679  |
| H | 3.1060462  | -3.5241192 | 0.7468421  |
| H | 1.4153786  | -4.0275087 | 0.4374786  |
| H | 2.0704344  | -2.5488375 | -0.3412488 |
| C | -6.0258947 | -0.2735137 | 0.6015377  |
| C | -5.8561833 | 0.8146598  | -0.4609474 |
| C | -6.6688939 | -1.5499485 | 0.0554533  |
| C | -6.7467164 | 0.2370248  | 1.8475401  |
| H | -5.3573927 | 1.6987407  | -0.0347655 |
| H | -5.2784131 | 0.4419204  | -1.3207264 |
| H | -6.8541172 | 1.1229966  | -0.8159545 |

|   |            |            |            |
|---|------------|------------|------------|
| H | -6.6852250 | -2.3347772 | 0.8303754  |
| H | -7.7106303 | -1.3255346 | -0.2296460 |
| H | -6.1349553 | -1.9244744 | -0.8308719 |
| H | -7.7708246 | 0.5429608  | 1.5763520  |
| H | -6.8054136 | -0.5569838 | 2.6102076  |
| H | -6.2175627 | 1.1009678  | 2.2749807  |
| B | -1.0343410 | 0.4364070  | 4.0272240  |
| C | -2.0959263 | -0.3810348 | 4.9544325  |
| C | 0.1596235  | 1.0362744  | 4.9691793  |
| C | -1.6785078 | 1.5010573  | 2.9740812  |
| C | -2.4209723 | -1.7408649 | 4.8814916  |
| C | -2.7126068 | 0.3211802  | 6.0024722  |
| C | 0.9545840  | 0.1475894  | 5.7107780  |
| C | 0.4576065  | 2.3943749  | 5.1540713  |
| C | -0.8404619 | 2.0944573  | 2.0129464  |
| C | -3.0280543 | 1.8756227  | 2.8915224  |
| C | -3.3095177 | -2.3691197 | 5.7670149  |
| C | -3.6061094 | -0.2577055 | 6.9086980  |
| C | 2.0099295  | 0.5484476  | 6.5387007  |
| C | 1.4986878  | 2.8450096  | 5.9793256  |
| C | -1.2765037 | 2.9858773  | 1.0312816  |
| C | -3.5056017 | 2.7885052  | 1.9406655  |
| C | -3.9035915 | -1.6223486 | 6.7898630  |
| C | 2.2798695  | 1.9159108  | 6.6765587  |
| C | -2.6357354 | 3.3271495  | 0.9892097  |
| F | -1.8814323 | -2.5454196 | 3.9301629  |
| F | -2.4655610 | 1.6417019  | 6.1439800  |
| F | 0.7135852  | -1.1843159 | 5.6509168  |
| F | -0.2612038 | 3.3544278  | 4.5387576  |
| F | 0.4764864  | 1.7786111  | 1.9992067  |
| F | -3.9544403 | 1.3652161  | 3.7246269  |
| F | -3.5846174 | -3.6763811 | 5.6449825  |
| F | -4.1740955 | 0.4697650  | 7.8810140  |
| F | 2.7425537  | -0.3533109 | 7.2093262  |
| F | 1.7448452  | 4.1561498  | 6.1134870  |
| F | -0.4260294 | 3.4989807  | 0.1317529  |
| F | -4.8099948 | 3.1165027  | 1.9014876  |
| F | -4.7534772 | -2.2045828 | 7.6446456  |
| F | 3.2765175  | 2.3301646  | 7.4675076  |
| F | -3.0985888 | 4.1607984  | 0.0520171  |

B(C<sub>6</sub>F<sub>5</sub>)<sub>3</sub>H<sup>⊖</sup> : hydridoborate anion

35

Energy = -2207.662336754

|   |            |            |            |
|---|------------|------------|------------|
| B | 0.1085098  | 0.1594407  | 0.8820058  |
| C | 0.2687701  | 1.6866356  | 0.3094850  |
| C | 1.2725568  | -0.8875000 | 0.3927419  |
| C | -1.3454941 | -0.5226300 | 0.5230371  |
| C | -0.6936856 | 2.6473845  | 0.6618224  |
| C | 1.3237180  | 2.1863464  | -0.4658130 |
| C | 2.2401711  | -1.3993377 | 1.2665643  |
| C | 1.3288131  | -1.3915562 | -0.9139788 |

|   |            |            |            |   |            |            |            |
|---|------------|------------|------------|---|------------|------------|------------|
| C | -1.7901249 | -1.6045968 | 1.2989286  | F | 1.0325247  | -2.3956844 | -1.0308330 |
| C | -2.2050920 | -0.1616621 | -0.5234441 | C | -3.8364664 | -1.8230073 | -1.8710020 |
| C | -0.6437121 | 3.9918300  | 0.2771740  | F | -4.8775291 | -0.6524061 | -0.0850105 |
| C | 1.4215337  | 3.5256829  | -0.8774976 | F | -2.7347024 | -2.9368221 | -3.6503481 |
| C | 3.2006352  | -2.3490053 | 0.8836522  | C | -0.6806296 | 4.8078250  | -0.6337180 |
| C | 2.2676305  | -2.3357823 | -1.3463814 | F | 1.2201282  | 4.9407029  | 0.7862033  |
| C | -3.0025120 | -2.2746082 | 1.0853018  | F | -2.5356745 | 4.5809914  | -2.0927894 |
| C | -3.4301121 | -0.7970531 | -0.7756743 | C | 3.9685620  | -0.8661409 | -2.4611860 |
| C | 0.4291826  | 4.4367725  | -0.5053043 | F | 4.3212973  | 1.3600137  | -3.1949946 |
| C | 3.2111436  | -2.8225893 | -0.4325940 | F | 3.5004254  | -3.0842916 | -1.7565654 |
| C | -3.8306894 | -1.8656524 | 0.0334384  | F | -4.9665120 | -2.4926472 | -2.1243007 |
| F | -1.7563715 | 2.2818616  | 1.4177330  | F | -0.8782282 | 6.1273622  | -0.5437618 |
| F | 2.3397709  | 1.3849879  | -0.8684494 | F | 5.1941676  | -1.2195918 | -2.8615359 |
| F | 2.2993262  | -0.9851851 | 2.5517560  | P | 0.1354464  | -0.5596504 | 1.4157210  |
| F | 0.4547533  | -0.9408505 | -1.8441171 | C | -1.3425620 | -1.6486640 | 1.6878048  |
| F | -1.0300189 | -2.0589034 | 2.3219866  | C | 0.2029617  | 0.7020402  | 2.7587151  |
| F | -1.8856056 | 0.8475191  | -1.3660152 | C | 1.5764979  | -1.7120177 | 1.6496596  |
| F | -1.6069680 | 4.8602263  | 0.6471148  | C | -1.4453172 | -2.6956754 | 0.7384045  |
| F | 2.4635783  | 3.9424091  | -1.6256118 | C | -2.3868414 | -1.4822736 | 2.6416134  |
| F | 4.1113630  | -2.8112295 | 1.7651680  | C | 0.8815145  | 0.5640745  | 4.0034015  |
| F | 2.2797859  | -2.7805451 | -2.6196192 | C | -0.5156014 | 1.8861306  | 2.4894136  |
| F | -3.3774784 | -3.3061507 | 1.8694842  | C | 1.3314115  | -3.0652611 | 1.9676936  |
| F | -4.2194305 | -0.4011835 | -1.7952047 | C | 2.9227511  | -1.2784664 | 1.4884879  |
| F | 0.5053689  | 5.7257873  | -0.8888366 | C | -2.5317138 | -3.5719687 | 0.7078333  |
| F | 4.1247174  | -3.7330394 | -0.8204785 | H | -0.6529431 | -2.8209034 | 0.0023358  |
| F | -5.0003794 | -2.4930533 | -0.1957519 | C | -3.4816240 | -2.3728782 | 2.5735671  |
| H | 0.1663457  | 0.2452298  | 2.1009029  | C | -2.4423643 | -0.4281385 | 3.7233022  |

B(C<sub>6</sub>F<sub>5</sub>)<sub>3</sub>·Po<sub>3</sub> : adduct of B(C<sub>6</sub>F<sub>5</sub>)<sub>3</sub> and P(*o*-Tol)<sub>3</sub>  
77

Energy = -3360.807287389

|   |            |            |            |   |            |            |            |
|---|------------|------------|------------|---|------------|------------|------------|
| B | -0.0580131 | 0.3595555  | -0.8975646 | C | 1.5479097  | -0.7028821 | 4.4901328  |
| C | -1.3949496 | -0.4394792 | -1.2970526 | C | -0.5246506 | 2.9616543  | 3.3814438  |
| C | -0.2821875 | 1.9630371  | -0.7959502 | H | -1.0919992 | 1.9545647  | 1.5668219  |
| C | 1.3517411  | -0.0881033 | -1.5491845 | C | 2.3689066  | -3.9960903 | 2.0704813  |
| C | -2.5893602 | -0.2203093 | -0.5849544 | H | 0.3092060  | -3.4028068 | 2.1467435  |
| C | -1.5078400 | -1.3574691 | -2.3545094 | C | 3.9495812  | -2.2396875 | 1.5849576  |
| C | 0.5687203  | 2.8223046  | -0.0803763 | C | 3.3177866  | 0.1587813  | 1.2745307  |
| C | -1.3128395 | 2.6301541  | -1.4876547 | C | -3.5706939 | -3.3994617 | 1.6297416  |
| C | 2.2400206  | 0.8098250  | -2.1799913 | H | -2.5681216 | -4.3678959 | -0.0423949 |
| C | 1.8284523  | -1.4113322 | -1.4977632 | H | -4.2914047 | -2.2420377 | 3.2995835  |
| C | -3.7905570 | -0.8827554 | -0.8343823 | H | -3.3067957 | -0.6205639 | 4.3783711  |
| F | -2.6024100 | 0.6791989  | 0.4288740  | H | -1.5342520 | -0.4146907 | 4.3448044  |
| C | -2.6904648 | -2.0559621 | -2.6397017 | H | -2.5557599 | 0.5817658  | 3.2976683  |
| F | -0.4675363 | -1.6044993 | -3.1745368 | C | 0.1925174  | 2.8593074  | 4.5788688  |
| C | 0.3880987  | 4.2023507  | 0.0375023  | H | 1.3883118  | 1.5759402  | 5.8380122  |
| F | 1.6394279  | 2.3141064  | 0.5596185  | H | 0.9248700  | -1.5900533 | 4.2941319  |
| C | -1.5301939 | 4.0139831  | -1.4110903 | H | 2.5199628  | -0.8834373 | 4.0010342  |
| F | -2.1555045 | 1.9669557  | -2.3053574 | H | 1.7229678  | -0.6331810 | 5.5757787  |
| C | 3.5237626  | 0.4513479  | -2.6168087 | H | -1.0885354 | 3.8677390  | 3.1390824  |
| F | 1.9005341  | 2.0930378  | -2.4121500 | C | 3.6896809  | -3.5863467 | 1.8550314  |
| C | 3.1049454  | -1.8130710 | -1.8994766 | H | 2.1384561  | -5.0375489 | 2.3164215  |
|   |            |            |            | H | 4.9837941  | -1.9044618 | 1.4492122  |
|   |            |            |            | H | 2.9832628  | 0.5266341  | 0.2944019  |
|   |            |            |            | H | 2.8676471  | 0.8219296  | 2.0318364  |

|   |            |            |           |
|---|------------|------------|-----------|
| H | 4.4125880  | 0.2660428  | 1.3260314 |
| H | -4.4452584 | -4.0577906 | 1.6168789 |
| H | 0.2110581  | 3.6915346  | 5.2900517 |
| H | 4.5141021  | -4.3042703 | 1.9136565 |

B(C<sub>6</sub>F<sub>5</sub>)<sub>3</sub> : Lewis acidic borane  
34

Energy = -2206.936230233

|   |            |            |            |
|---|------------|------------|------------|
| B | -0.0000021 | -0.0004756 | 0.0000377  |
| C | -0.0000020 | 1.5681536  | 0.0000299  |
| C | 1.3582639  | -0.7851840 | -0.0016662 |
| C | -1.3582803 | -0.7851685 | 0.0017266  |
| C | -0.9554778 | 2.3182402  | 0.7169109  |
| C | 0.9554694  | 2.3182388  | -0.7168601 |
| C | 2.4865083  | -0.3331648 | 0.7138881  |
| C | 1.5284814  | -1.9881082 | -0.7182019 |
| C | -1.5285399 | -1.9880616 | 0.7183047  |
| C | -2.4864768 | -0.3331859 | -0.7139246 |
| C | -0.9658199 | 3.7162818  | 0.7377981  |
| C | 0.9658601  | 3.7162818  | -0.7376849 |
| C | 3.7019383  | -1.0240415 | 0.7338430  |
| C | 2.7333805  | -2.6971827 | -0.7396925 |
| C | -2.7334049 | -2.6971972 | 0.7396567  |
| C | -3.7018732 | -1.0241188 | -0.7340085 |
| C | 0.0000049  | 4.4166978  | 0.0000370  |
| C | 3.8239676  | -2.2110933 | -0.0034943 |
| C | -3.8239586 | -2.2111189 | 0.0034019  |
| F | -1.8940047 | 1.6935201  | 1.4487747  |
| F | 1.8938980  | 1.6935196  | -1.4488518 |
| F | 2.4161761  | 0.7923250  | 1.4453666  |
| F | 0.5170420  | -2.4880894 | -1.4488145 |
| F | -0.5171979 | -2.4879175 | 1.4491387  |
| F | -2.4161344 | 0.7923346  | -1.4453554 |
| F | -1.8787444 | 4.3881010  | 1.4470523  |
| F | 1.8789053  | 4.3881019  | -1.4467837 |
| F | 4.7413229  | -0.5697040 | 1.4416181  |
| F | 2.8571024  | -3.8244689 | -1.4480576 |
| F | -2.8571035 | -3.8245748 | 1.4478808  |
| F | -4.7411497 | -0.5699200 | -1.4420312 |
| F | -0.0000524 | 5.7488613  | -0.0000359 |
| F | 4.9772232  | -2.8778568 | -0.0043062 |
| F | -4.9772527 | -2.8778148 | 0.0042769  |

B<sup>⊖</sup>TMPH<sup>+</sup> : unstable H-bonded contact ion pair  
85

Energy = -3260.710420657

|   |            |            |           |
|---|------------|------------|-----------|
| N | -2.5003634 | -1.3801717 | 2.1844226 |
| N | -3.4351358 | -1.0237927 | 1.4337500 |
| C | -1.2309202 | -1.4139807 | 1.4709047 |
| O | -0.2850619 | -0.7733939 | 2.0451920 |
| O | -1.1684790 | -2.1346011 | 0.4663261 |
| C | -4.7689904 | -1.2707917 | 1.8985624 |

|   |            |            |            |
|---|------------|------------|------------|
| O | -5.3871179 | -2.1530238 | 1.3089816  |
| O | -5.1671860 | -0.4413136 | 2.8272618  |
| H | -2.5749978 | -2.7480816 | -0.1977042 |
| C | -6.5941542 | -0.4347248 | 3.3369981  |
| C | -7.5265199 | -0.1253098 | 2.1643619  |
| C | -6.8751833 | -1.7885129 | 3.9917022  |
| C | -6.5620260 | 0.6999141  | 4.3586762  |
| H | -7.2361125 | 0.8218142  | 1.6794380  |
| H | -7.5151141 | -0.9354439 | 1.4194367  |
| H | -8.5549209 | -0.0153887 | 2.5479301  |
| H | -6.1231852 | -2.0030998 | 4.7692960  |
| H | -7.8681960 | -1.7531481 | 4.4708340  |
| H | -6.8719393 | -2.5997509 | 3.2478514  |
| H | -7.5590995 | 0.8084675  | 4.8166703  |
| H | -5.8291203 | 0.4846538  | 5.1533170  |
| H | -6.2905220 | 1.6514715  | 3.8730345  |
| B | 1.1481761  | -0.8634021 | 1.4078843  |
| C | 1.1490963  | -0.2341842 | -0.1083406 |
| C | 2.0936190  | 0.1084986  | 2.3209214  |
| C | 1.4876801  | -2.4692357 | 1.4881288  |
| C | 0.1051885  | 0.4475872  | -0.7452915 |
| C | 2.3331738  | -0.3187393 | -0.8566202 |
| C | 1.6604237  | 1.4145419  | 2.6015609  |
| C | 3.3789628  | -0.2044577 | 2.7865489  |
| C | 1.5988714  | -3.0766171 | 2.7498150  |
| C | 1.4918728  | -3.3639940 | 0.4078624  |
| C | 0.1876475  | 0.9388431  | -2.0563038 |
| C | 2.4733356  | 0.1693606  | -2.1602077 |
| C | 2.4143156  | 2.3431467  | 3.3309925  |
| C | 4.1723122  | 0.6946851  | 3.5143060  |
| C | 1.7358610  | -4.4570792 | 2.9463564  |
| C | 1.6171372  | -4.7524027 | 0.5549729  |
| C | 1.3828781  | 0.8041378  | -2.7696124 |
| C | 3.6855524  | 1.9774984  | 3.7897123  |
| C | 1.7381890  | -5.3063545 | 1.8331516  |
| F | -1.0868609 | 0.6573596  | -0.1291866 |
| F | 3.4076884  | -0.9384507 | -0.3206678 |
| F | 0.4628444  | 1.8405191  | 2.1450175  |
| F | 3.9286008  | -1.4142068 | 2.5519193  |
| F | 1.5568929  | -2.3192059 | 3.8665821  |
| F | 1.3164112  | -2.9418094 | -0.8637600 |
| F | -0.8732856 | 1.5390319  | -2.6271532 |
| F | 3.6301350  | 0.0367663  | -2.8288649 |
| F | 1.9416073  | 3.5769529  | 3.5766430  |
| F | 5.3938017  | 0.3380081  | 3.9450469  |
| F | 1.8469809  | -4.9718154 | 4.1818596  |
| F | 1.5686122  | -5.5592134 | -0.5231332 |
| F | 1.4842720  | 1.2759539  | -4.0210352 |
| F | 4.4307051  | 2.8494198  | 4.4844504  |
| F | 1.8496345  | -6.6333975 | 1.9904295  |
| N | -3.3580549 | -3.2550350 | -0.7050606 |
| C | -3.3005238 | -2.7187676 | -2.1424198 |

C -3.1189044 -4.7423893 -0.4115285  
H -4.2328229 -2.9458022 -0.2351861  
C -1.9602182 -3.2016829 -2.7345567  
C -4.5172710 -3.1786510 -2.9576050  
C -3.3214234 -1.1868268 -2.0176213  
C -4.3128649 -5.5945565 -0.8633044  
C -2.9694677 -4.8417976 1.1165784  
C -1.7995865 -5.1274645 -1.1094868  
C -1.7420962 -4.7139996 -2.5857670  
H -1.1393315 -2.6684705 -2.2216596  
H -1.9311648 -2.9006851 -3.7958550  
H -4.4685497 -4.2366881 -3.2511577  
H -5.4555858 -3.0091126 -2.4016633  
H -4.5593944 -2.5774021 -3.8803482  
H -2.5137272 -0.8190776 -1.3685662  
H -3.1898251 -0.7448028 -3.0186473  
H -4.2842106 -0.8350596 -1.6080835  
H -5.2649144 -5.1674996 -0.5034440  
H -4.3695028 -5.7129531 -1.9544256  
H -4.2060849 -6.5995431 -0.4235530  
H -2.1260710 -4.2274463 1.4695442  
H -3.8914052 -4.5192591 1.6302162  
H -2.7694160 -5.8903891 1.3897909  
H -0.9686236 -4.6378062 -0.5747805  
H -1.6564929 -6.2155693 -0.9962720  
H -2.4856152 -5.2767022 -3.1798662  
H -0.7510154 -4.9793807 -2.9905331

**B<sup>⊖</sup>** : anion tBuO<sub>2</sub>CN=NCO<sub>2</sub>B(C<sub>6</sub>F<sub>5</sub>)<sub>3</sub><sup>⊖</sup>

55

Energy = -2851.201773315

N -2.0137619 -1.1446743 1.3403686  
N -2.5822151 -0.1272312 0.8872191  
C -0.5934020 -0.9861637 1.5999681  
O -0.3876695 -0.5509904 2.8097728  
O 0.1996678 -1.3599569 0.7535174  
C -3.9590859 -0.3127548 0.5230138  
O -4.2952905 -0.4654667 -0.6356641  
O -4.7298960 -0.1596513 1.5995161  
C -6.2150748 -0.1279568 1.4890686  
C -6.6314934 1.0500804 0.6012878  
C -6.7072906 -1.4767169 0.9519529  
C -6.6463953 0.0861394 2.9415473  
H -6.2042279 1.9902556 0.9895841  
H -6.2928931 0.9014431 -0.4351439  
H -7.7317040 1.1388072 0.6080700  
H -6.3232667 -2.2986569 1.5796257  
H -7.8104476 -1.5003792 0.9826048  
H -6.3751617 -1.6314342 -0.0856295  
H -7.7472544 0.1250246 3.0035820  
H -6.2828982 -0.7397392 3.5751912  
H -6.2342131 1.0325233 3.3290442

B 1.0200240 -0.5127765 3.4084560  
C 1.9595423 0.6416226 2.7060477  
C 0.8019924 0.0062007 4.9610982  
C 1.5937452 -2.0482107 3.2877451  
C 1.5495431 1.5827244 1.7515708  
C 3.2718426 0.8102454 3.1727954  
C 0.0148448 1.1476069 5.1892084  
C 1.3992704 -0.5353605 6.1082854  
C 0.9163188 -3.0751273 3.9634757  
C 2.6410685 -2.4794755 2.4632372  
C 2.3913475 2.5965733 1.2645098  
C 4.1472928 1.8009171 2.7173681  
C -0.2126207 1.6943994 6.4597411  
C 1.2052955 -0.0180915 7.3981114  
C 1.2608589 -4.4290120 3.8770058  
C 3.0262221 -3.8236611 2.3464657  
C 3.6969449 2.7086872 1.7508804  
C 0.3921051 1.1054685 7.5756803  
C 2.3296360 -4.8064966 3.0561578  
F 0.3014111 1.5762829 1.2399231  
F 3.7537707 -0.0345187 4.1147635  
F -0.5581133 1.7973905 4.1559181  
F 2.2115540 -1.6119593 6.0349939  
F -0.1317017 -2.7773161 4.7649748  
F 3.3460941 -1.6103985 1.7099386  
F 1.9477670 3.4713308 0.3415659  
F 5.4020850 1.8982092 3.1972369  
F -0.9852106 2.7864888 6.6161534  
F 1.7977140 -0.5882837 8.4650730  
F 0.5795658 -5.3658328 4.5647620  
F 4.0461642 -4.1795790 1.5416892  
F 4.5125646 3.6767160 1.2958346  
F 0.1950281 1.6153578 8.8044399  
F 2.6823704 -6.1000246 2.9516441

CO<sub>2</sub> : carbon dioxide molecule

3

Energy = -188.4745630662

C -0.0001336 -0.0000149 0.0000029  
O 1.1719348 0.0000507 0.0000316  
O -1.1722048 -0.0000826 -0.0000260

**C<sup>⊖</sup>** : adduct of anion **B<sup>⊖</sup>** and B(C<sub>6</sub>F<sub>5</sub>)<sub>3</sub> at C=O  
89

Energy = -5058.186414170

N 0.0358860 -0.4273785 1.2612125  
N -0.9120668 0.3794807 1.1406078  
C 1.1251986 -0.1600569 0.3100798  
O 2.2522298 -0.2862559 0.9380077  
O 0.8885683 0.0404028 -0.8667303  
C -1.9968806 0.2403318 2.0269220  
O -3.1851821 0.2498450 1.6101212

O -1.6807437 0.2644358 3.2795967  
 C -2.7012786 0.3053791 4.4152549  
 C -3.4708168 1.6215581 4.3189405  
 C -3.5904539 -0.9351202 4.3153570  
 C -1.7837481 0.2570852 5.6350555  
 H -2.7741633 2.4746917 4.2762450  
 H -4.1294819 1.6435357 3.4400296  
 H -4.0910091 1.7244655 5.2257305  
 H -2.9764070 -1.8474557 4.2383780  
 H -4.1949142 -0.9996245 5.2359313  
 H -4.2681370 -0.8845061 3.4514676  
 H -2.3972296 0.2811435 6.5507678  
 H -1.1842356 -0.6677371 5.6330827  
 H -1.1026214 1.1234061 5.6415822  
 B 3.5808378 -0.2248847 0.1555016  
 C 3.8747509 1.2848303 -0.4202745  
 C 4.7461937 -0.5047995 1.2835044  
 C 3.4281509 -1.3966922 -0.9831356  
 C 3.1204004 2.4384984 -0.1684526  
 C 5.0553421 1.4991497 -1.1472049  
 C 4.7276674 0.2319675 2.4790545  
 C 5.8389333 -1.3716170 1.1403781  
 C 3.2460775 -2.7235050 -0.5614787  
 C 3.2824936 -1.1920742 -2.3618142  
 C 3.4862509 3.7114128 -0.6353369  
 C 5.4617886 2.7453274 -1.6338416  
 C 5.6895013 0.0990763 3.4896803  
 C 6.8285495 -1.5325532 2.1220000  
 C 2.9686936 -3.7870272 -1.4267781  
 C 3.0077708 -2.2266675 -3.2677701  
 C 4.6651620 3.8668685 -1.3705354  
 C 6.7529943 -0.7919782 3.3061153  
 C 2.8432347 -3.5318280 -2.7968578  
 F 1.9805767 2.3968454 0.5565680  
 F 5.8628843 0.4482482 -1.4210364  
 F 3.7557724 1.1420736 2.7007015  
 F 6.0002851 -2.1160549 0.0263791  
 F 3.3278623 -3.0288979 0.7544831  
 F 3.3724260 0.0401034 -2.9008932  
 F 2.7201542 4.7851517 -0.3694888  
 F 6.6014240 2.8812481 -2.3371758  
 F 5.6137779 0.8277807 4.6193394  
 F 7.8509847 -2.3877820 1.9345034  
 F 2.8041247 -5.0379556 -0.9593146  
 F 2.8664286 -1.9688892 -4.5807635  
 F 5.0311059 5.0797025 -1.8201239  
 F 7.6923291 -0.9333720 4.2569971  
 F 2.5590262 -4.5305734 -3.6483609  
 B -3.6257818 0.1254532 0.0771061  
 C -3.5364807 1.6002320 -0.6118910  
 C -2.6606726 -1.0305231 -0.5440826  
 C -5.2051250 -0.2912317 0.2121210

C -3.0685413 2.7849421 -0.0294748  
 C -4.0654597 1.7411635 -1.9040886  
 C -1.8165328 -0.9062074 -1.6599597  
 C -2.5855953 -2.2655500 0.1247786  
 C -6.0574851 0.4895951 1.0082835  
 C -5.8280164 -1.3569540 -0.4537445  
 C -3.0902671 4.0235133 -0.6888574  
 C -4.1063656 2.9512882 -2.6026246  
 C -0.9609541 -1.9345524 -2.0878789  
 C -1.7349486 -3.3060079 -0.2494523  
 C -7.4203365 0.2230718 1.1880737  
 C -7.1910726 -1.6581825 -0.3118574  
 C -3.6142009 4.1074087 -1.9827749  
 C -0.9181804 -3.1365433 -1.3780577  
 C -7.9926520 -0.8628419 0.5146240  
 F -2.5712729 2.8076371 1.2302877  
 F -4.5525460 0.6510438 -2.5385129  
 F -1.7667456 0.2266943 -2.3747518  
 F -3.3623411 -2.4795049 1.2184169  
 F -5.5741087 1.5798330 1.6512508  
 F -5.1348277 -2.1597548 -1.2843235  
 F -2.6274654 5.1284800 -0.0825815  
 F -4.6142665 3.0195853 -3.8439887  
 F -0.1691269 -1.7611331 -3.1523352  
 F -1.7028550 -4.4599643 0.4348520  
 F -8.1805577 1.0026786 1.9751218  
 F -7.7349031 -2.6959154 -0.9679998  
 F -3.6464025 5.2841890 -2.6249042  
 F -0.1040541 -4.1271583 -1.7655034  
 F -9.2969199 -1.1373251 0.6603606

**D<sup>2+</sup>** : H-bonded TMPH<sup>+</sup> and dianion

106

Energy = -5310.048504751

N 0.2957005 0.2028756 -0.6401881  
 N -0.5630567 -0.6313009 -0.2867758  
 C 1.5122169 0.1439931 0.1331494  
 O 2.5828151 0.1602807 -0.5900608  
 O 1.4564783 0.2320466 1.3637483  
 C -1.8648512 -0.5050621 -0.9189182  
 O -2.6285098 0.2042973 -0.1339983  
 O -2.1238991 -1.1127910 -1.9389341  
 B 3.9340490 0.4526779 0.1075578  
 C 5.0738588 0.3686784 -1.0669191  
 C 3.6919838 1.9558863 0.7405787  
 C 4.3329647 -0.7120445 1.1998961  
 C 5.1033079 -0.7555884 -1.9076132  
 C 6.1131301 1.2879281 -1.2678797  
 C 3.4339897 3.0269589 -0.1332374  
 C 3.4752772 2.2541716 2.0894767  
 C 5.4942025 -0.5332874 1.9673822  
 C 3.6846405 -1.9398702 1.3977581

|   |            |            |            |                                                                                  |            |            |            |
|---|------------|------------|------------|----------------------------------------------------------------------------------|------------|------------|------------|
| C | 6.0608650  | -0.9495476 | -2.9121510 | F                                                                                | -7.8855246 | 2.4614786  | -2.7512741 |
| C | 7.0963038  | 1.1329726  | -2.2560847 | F                                                                                | -4.3253999 | -4.3243416 | 1.7532476  |
| C | 3.0104337  | 4.2967099  | 0.2852195  | F                                                                                | -6.1237807 | -3.8178785 | -2.6135799 |
| C | 3.0313521  | 3.4966806  | 2.5563329  | F                                                                                | -5.4783849 | 3.0622879  | 4.7113893  |
| C | 5.9732600  | -1.4626604 | 2.8976334  | F                                                                                | -6.1747050 | 3.8440028  | -4.4025854 |
| C | 4.1211119  | -2.9002255 | 2.3245491  | F                                                                                | -5.5287913 | -5.4186129 | -0.4649009 |
| C | 7.0689795  | 0.0061936  | -3.0850073 | N                                                                                | 0.8284467  | 0.4781950  | 3.9455498  |
| C | 2.7897168  | 4.5313091  | 1.6489786  | C                                                                                | 1.1373971  | -0.7432263 | 4.8223157  |
| C | 5.2734317  | -2.6623823 | 3.0798424  | C                                                                                | -0.6011508 | 1.0515958  | 3.8707541  |
| F | 4.1857993  | -1.7336828 | -1.7575370 | H                                                                                | 1.1288455  | 0.2915785  | 2.9517120  |
| F | 6.2226208  | 2.3947929  | -0.5024491 | C                                                                                | 0.4931158  | -0.5058543 | 6.2034554  |
| F | 3.5711438  | 2.8568997  | -1.4620319 | C                                                                                | 0.6468373  | -2.0227853 | 4.1255499  |
| F | 3.6264695  | 1.3147294  | 3.0596536  | C                                                                                | 2.6673563  | -0.7934663 | 4.9504555  |
| F | 6.2030680  | 0.6103374  | 1.8346517  | C                                                                                | -1.5013804 | 0.1159248  | 3.0567501  |
| F | 2.5675762  | -2.2732608 | 0.7142857  | C                                                                                | -0.4506226 | 2.3957092  | 3.1417917  |
| F | 6.0344236  | -2.0437921 | -3.6925340 | C                                                                                | -1.0988204 | 1.2360705  | 5.3141506  |
| F | 8.0656221  | 2.0525623  | -2.4113663 | C                                                                                | -0.9698473 | -0.0467460 | 6.1462669  |
| F | 2.7918271  | 5.2769165  | -0.6027607 | H                                                                                | 1.0871514  | 0.2641344  | 6.7332023  |
| F | 2.7658656  | 3.6684000  | 3.8725973  | H                                                                                | 0.5942604  | -1.4377004 | 6.7860298  |
| F | 7.0840332  | -1.2184978 | 3.6150209  | H                                                                                | -0.4464011 | -2.1310560 | 4.1444665  |
| F | 3.4232281  | -4.0357198 | 2.5093489  | H                                                                                | 0.9843008  | -2.0542367 | 3.0765284  |
| F | 8.0031167  | -0.1584730 | -4.0350731 | H                                                                                | 1.0837837  | -2.8893283 | 4.6477633  |
| F | 2.3508298  | 5.7226916  | 2.0758648  | H                                                                                | 3.0646127  | 0.1345554  | 5.3968851  |
| F | 5.6961821  | -3.5663038 | 3.9787895  | H                                                                                | 2.9450432  | -1.6362961 | 5.6039115  |
| B | -4.1538193 | 0.2584087  | -0.2618241 | H                                                                                | 3.1428672  | -0.9398146 | 3.9694029  |
| C | -4.6241093 | 1.0262646  | 1.1264824  | H                                                                                | -1.0221531 | -0.1840829 | 2.1129128  |
| C | -4.6373450 | 1.2252278  | -1.4946184 | H                                                                                | -1.7968100 | -0.7878114 | 3.6069358  |
| C | -4.6437229 | -1.3063048 | -0.3565730 | H                                                                                | -2.4234295 | 0.6562535  | 2.8013428  |
| C | -5.6303392 | 0.6081061  | 2.0087520  | H                                                                                | 0.2688283  | 3.0557237  | 3.6585358  |
| C | -3.9738431 | 2.2159824  | 1.4957103  | H                                                                                | -0.1141772 | 2.2384748  | 2.1043105  |
| C | -3.8070111 | 1.9601097  | -2.3514264 | H                                                                                | -1.4233788 | 2.9071561  | 3.1106952  |
| C | -6.0117311 | 1.4461201  | -1.6663298 | H                                                                                | -0.5193383 | 2.0477571  | 5.7965193  |
| C | -4.3408901 | -2.1780002 | 0.7007622  | H                                                                                | -2.1468907 | 1.5792957  | 5.2684807  |
| C | -5.2369961 | -1.9185174 | -1.4682297 | H                                                                                | -1.6092317 | -0.8425756 | 5.7245600  |
| C | -5.9313978 | 1.2704572  | 3.2092410  | H                                                                                | -1.3348007 | 0.1351983  | 7.1714682  |
| C | -4.2438703 | 2.9099162  | 2.6828606  | H                                                                                | 1.4432413  | 1.2418489  | 4.2672158  |
| C | -4.3048145 | 2.8348273  | -3.3318258 |                                                                                  |            |            |            |
| C | -6.5544000 | 2.3028004  | -2.6286138 |                                                                                  |            |            |            |
| C | -4.6295861 | -3.5467112 | 0.6973211  | E : adduct tBuO <sub>2</sub> CN=NHB(C <sub>6</sub> F <sub>5</sub> ) <sub>3</sub> |            |            |            |
| C | -5.5494632 | -3.2855503 | -1.5192987 | 53                                                                               |            |            |            |
| C | -5.2201666 | 2.4228419  | 3.5583757  | Energy = -2663.211798749                                                         |            |            |            |
| C | -5.6852274 | 3.0087127  | -3.4702616 | N                                                                                | -1.0623655 | -0.4615563 | -0.5082495 |
| C | -5.2407241 | -4.1068346 | -0.4305226 | N                                                                                | -2.1688369 | 0.0810173  | -0.3600462 |
| F | -6.3715620 | -0.4894619 | 1.7550798  | C                                                                                | -3.1768626 | -0.5437754 | -1.2619322 |
| F | -3.0134021 | 2.7450214  | 0.7094171  | O                                                                                | -4.3271247 | 0.0172168  | -1.0013299 |
| F | -2.4637587 | 1.8745129  | -2.2788905 | O                                                                                | -2.8684425 | -1.4106505 | -2.0560472 |
| F | -6.8903377 | 0.7877797  | -0.8729529 | B                                                                                | 0.2894597  | -0.0415869 | 0.2250433  |
| F | -3.7421065 | -1.7008387 | 1.8198189  | C                                                                                | -5.5878595 | -0.3967939 | -1.7335480 |
| F | -5.5346818 | -1.2155479 | -2.5800068 | C                                                                                | 0.8402688  | -1.3650152 | 1.0128575  |
| F | -6.8903964 | 0.8048393  | 4.0296477  | C                                                                                | 1.3130111  | 0.2251035  | -1.0496919 |
| F | -3.5528074 | 4.0233902  | 3.0067433  | C                                                                                | -0.0622419 | 1.2483081  | 1.1433187  |
| F | -3.4651637 | 3.5148158  | -4.1332050 | C                                                                                | -5.8490695 | -1.8759998 | -1.4420753 |
|   |            |            |            | C                                                                                | -6.6377152 | 0.5095588  | -1.0945944 |

|                                                                                                                       |            |            |            |   |            |            |            |
|-----------------------------------------------------------------------------------------------------------------------|------------|------------|------------|---|------------|------------|------------|
| C                                                                                                                     | -5.3978962 | -0.0985397 | -3.2222056 | B | -2.3166073 | 1.0800214  | 0.2833250  |
| C                                                                                                                     | 0.1286811  | -2.5515692 | 1.2107214  | C | -3.6579725 | 1.3515929  | 1.2208148  |
| C                                                                                                                     | 2.1470243  | -1.3488098 | 1.5236823  | C | -1.4022211 | 2.4544831  | 0.5233000  |
| C                                                                                                                     | 1.4460985  | -0.7315962 | -2.0681533 | C | -2.6847214 | 0.8330935  | -1.3102209 |
| C                                                                                                                     | 2.1729596  | 1.3303177  | -1.1587888 | C | -4.0426917 | 0.6551636  | 2.3756075  |
| C                                                                                                                     | -0.5405969 | 2.4197787  | 0.5331960  | C | -4.4893044 | 2.4384343  | 0.9013117  |
| C                                                                                                                     | 0.0184291  | 1.2968880  | 2.5422413  | C | -0.8981759 | 2.6782786  | 1.8138891  |
| H                                                                                                                     | -5.0705673 | -2.5180742 | -1.8815068 | C | -1.1891960 | 3.5167928  | -0.3676529 |
| H                                                                                                                     | -5.9009651 | -2.0523641 | -0.3547360 | C | -1.6474766 | 0.7791161  | -2.2497397 |
| H                                                                                                                     | -6.8206716 | -2.1540835 | -1.8836632 | C | -3.9593902 | 0.6978959  | -1.8861383 |
| H                                                                                                                     | -6.3873554 | 1.5701576  | -1.2598639 | C | -5.2036093 | 0.9499012  | 3.1067850  |
| H                                                                                                                     | -7.6210079 | 0.3038292  | -1.5483989 | F | -3.3257503 | -0.3855931 | 2.8671768  |
| H                                                                                                                     | -6.7030592 | 0.3233765  | -0.0101694 | C | -5.6480876 | 2.7826561  | 1.6041773  |
| H                                                                                                                     | -5.1355785 | 0.9618003  | -3.3738199 | F | -4.2029166 | 3.1920656  | -0.1850346 |
| H                                                                                                                     | -4.6182982 | -0.7366125 | -3.6654751 | C | -0.1998350 | 3.8247916  | 2.2046756  |
| H                                                                                                                     | -6.3493765 | -0.2968275 | -3.7435168 | F | -1.1249077 | 1.7599944  | 2.7923968  |
| C                                                                                                                     | 0.6581128  | -3.6660757 | 1.8751208  | C | -0.5360158 | 4.7068483  | -0.0149937 |
| F                                                                                                                     | -1.1452403 | -2.6684373 | 0.7510533  | F | -1.6381049 | 3.4627929  | -1.6441410 |
| C                                                                                                                     | 2.7176508  | -2.4321631 | 2.2003931  | C | -1.8153105 | 0.6247569  | -3.6276573 |
| F                                                                                                                     | 2.8938780  | -0.2328187 | 1.4021138  | F | -0.3632803 | 0.8633280  | -1.8219801 |
| C                                                                                                                     | 2.3393959  | -0.6230801 | -3.1393030 | C | -4.1898466 | 0.5275709  | -3.2609622 |
| F                                                                                                                     | 0.6833613  | -1.8618398 | -2.0355636 | F | -5.0820886 | 0.6983452  | -1.1316733 |
| C                                                                                                                     | 3.0850366  | 1.4832155  | -2.2134483 | C | -6.0119444 | 2.0236190  | 2.7243250  |
| F                                                                                                                     | 2.1875768  | 2.2969656  | -0.2256338 | F | -5.5444277 | 0.1969221  | 4.1688292  |
| C                                                                                                                     | -0.8985074 | 3.5751689  | 1.2321387  | F | -6.4101712 | 3.8191828  | 1.2205291  |
| F                                                                                                                     | -0.6677715 | 2.4576507  | -0.8134018 | C | -0.0200472 | 4.8555034  | 1.2759815  |
| C                                                                                                                     | -0.3242451 | 2.4357845  | 3.2884714  | F | 0.2794065  | 3.9507901  | 3.4541732  |
| F                                                                                                                     | 0.4280431  | 0.2302120  | 3.2586980  | F | -0.3873437 | 5.6964215  | -0.9079490 |
| C                                                                                                                     | 1.9659171  | -3.6037048 | 2.3708096  | C | -3.1066134 | 0.4780710  | -4.1428499 |
| F                                                                                                                     | -0.0691396 | -4.7798953 | 2.0365737  | F | -0.7518160 | 0.5293139  | -4.4471398 |
| F                                                                                                                     | 3.9652951  | -2.3634321 | 2.6826280  | F | -5.4385409 | 0.3822156  | -3.7260288 |
| C                                                                                                                     | 3.1670103  | 0.5044298  | -3.2116623 | F | -7.1220526 | 2.3203579  | 3.4155566  |
| F                                                                                                                     | 2.4100664  | -1.5741586 | -4.0790251 | F | 0.6392810  | 5.9698235  | 1.6197216  |
| F                                                                                                                     | 3.8868792  | 2.5540025  | -2.2663356 | F | -3.2957227 | 0.2738888  | -5.4510877 |
| C                                                                                                                     | -0.7856465 | 3.5800193  | 2.6295828  | P | -1.5614541 | -2.8387070 | 0.1697948  |
| F                                                                                                                     | -1.3458843 | 4.6635365  | 0.5910497  | C | -1.7842413 | -3.2878831 | -1.5751403 |
| F                                                                                                                     | -0.2239752 | 2.4292711  | 4.6257295  | C | -3.1739441 | -2.7663603 | 0.9536182  |
| F                                                                                                                     | 2.4934704  | -4.6534124 | 3.0097845  | C | -0.3268041 | -3.8959843 | 0.9417566  |
| F                                                                                                                     | 4.0319310  | 0.6415919  | -4.2207168 | C | -1.2709870 | -2.4277591 | -2.5706689 |
| F                                                                                                                     | -1.1216463 | 4.6710105  | 3.3276087  | C | -2.4873915 | -4.4723537 | -1.9363727 |
| H                                                                                                                     | -1.0373896 | -1.2346542 | -1.2240596 | C | -3.6155352 | -3.5333830 | 2.0710014  |
|                                                                                                                       |            |            |            | C | -4.0568067 | -1.8905763 | 0.2812517  |
|                                                                                                                       |            |            |            | C | 0.2091085  | -4.9765509 | 0.2043829  |
|                                                                                                                       |            |            |            | C | 0.1549558  | -3.5762507 | 2.2403143  |
|                                                                                                                       |            |            |            | C | -1.4157646 | -2.7343157 | -3.9283696 |
|                                                                                                                       |            |            |            | H | -0.7921891 | -1.4865103 | -2.2936188 |
|                                                                                                                       |            |            |            | C | -2.6148159 | -4.7531077 | -3.3088039 |
|                                                                                                                       |            |            |            | C | -3.1230439 | -5.3933846 | -0.9231493 |
|                                                                                                                       |            |            |            | C | -4.9360614 | -3.3070589 | 2.5032504  |
|                                                                                                                       |            |            |            | C | -2.8176261 | -4.5885954 | 2.8009856  |
|                                                                                                                       |            |            |            | C | -5.3637461 | -1.7062429 | 0.7320225  |
|                                                                                                                       |            |            |            | H | -3.7061078 | -1.3515782 | -0.6017245 |
| <b>F·B(C<sub>6</sub>F<sub>5</sub>)<sub>3</sub> : adduct of F and B(C<sub>6</sub>F<sub>5</sub>)<sub>3</sub> at C=O</b> |            |            |            |   |            |            |            |
| 118                                                                                                                   |            |            |            |   |            |            |            |
| Energy = -5866.886937035                                                                                              |            |            |            |   |            |            |            |
| N                                                                                                                     | -1.5578037 | -0.1717364 | 0.8554973  |   |            |            |            |
| N                                                                                                                     | -0.8791034 | -1.1424868 | 0.1672940  |   |            |            |            |
| H                                                                                                                     | -1.1905873 | -0.0706755 | 1.8023857  |   |            |            |            |
| C                                                                                                                     | 0.4883928  | -1.0366989 | -0.0256946 |   |            |            |            |
| O                                                                                                                     | 1.1331124  | -0.0944569 | 0.4810839  |   |            |            |            |
| O                                                                                                                     | 1.1245885  | -1.9712377 | -0.7144737 |   |            |            |            |
| H                                                                                                                     | 0.5387060  | -2.4753666 | -1.3236252 |   |            |            |            |





|   |            |            |            |   |            |            |            |
|---|------------|------------|------------|---|------------|------------|------------|
| P | 2.5159621  | -0.9036587 | 0.5528904  | O | 3.1324351  | 1.9087408  | 0.1876930  |
| C | 1.6287248  | -2.4131533 | 1.0028313  | H | 0.0555192  | 1.3853552  | 1.3974631  |
| C | 3.8041140  | -0.4031409 | 1.7164323  | B | -1.3185903 | 0.3010607  | -0.0032003 |
| C | 3.1905505  | -1.1394485 | -1.1158216 | C | -2.2888305 | -0.9076984 | 0.5527257  |
| C | 0.6082927  | -2.7136429 | 0.0729176  | C | -2.1642883 | 1.6879879  | 0.2755163  |
| C | 1.8676333  | -3.2692084 | 2.1129793  | C | -0.8044569 | 0.1376793  | -1.5457415 |
| C | 3.4641346  | 0.0351714  | 3.0241763  | C | -2.1321283 | -1.7062870 | 1.6911797  |
| C | 5.1416788  | -0.4088563 | 1.2740492  | C | -3.4991629 | -1.1238761 | -0.1311515 |
| C | 2.9882552  | -0.1127658 | -2.0597342 | C | -2.3917935 | 2.0920050  | 1.5999196  |
| C | 3.8642927  | -2.3401650 | -1.4789786 | C | -2.7999152 | 2.4800895  | -0.6934104 |
| C | -0.2235631 | -3.8203949 | 0.2451618  | C | -0.0785773 | 1.1863076  | -2.1350501 |
| H | 0.4753101  | -2.0678896 | -0.7974706 | C | -0.9924813 | -0.9700874 | -2.3869647 |
| C | 0.9970231  | -4.3670497 | 2.2664109  | C | -3.0373436 | -2.6970798 | 2.0922682  |
| C | 2.9965149  | -3.1327609 | 3.1102083  | F | -1.0334753 | -1.5865762 | 2.4993524  |
| C | 4.5202974  | 0.4216354  | 3.8679233  | C | -4.4433691 | -2.0913815 | 0.2271230  |
| C | 2.0392300  | 0.1158162  | 3.5267371  | F | -3.7786370 | -0.3852495 | -1.2243879 |
| C | 6.1697447  | -0.0208436 | 2.1381719  | C | -3.1483850 | 3.2073778  | 1.9714642  |
| H | 5.3701757  | -0.7097677 | 0.2470056  | F | -1.8464763 | 1.3651111  | 2.6163231  |
| C | 3.4191184  | -0.2698745 | -3.3810373 | C | -3.5716040 | 3.6075197  | -0.3744393 |
| H | 2.5063541  | 0.8147604  | -1.7507174 | F | -2.7048265 | 2.1909892  | -2.0058707 |
| C | 4.2903579  | -2.4631115 | -2.8143025 | C | 0.4354318  | 1.1544904  | -3.4335708 |
| C | 4.1379341  | -3.4718349 | -0.5153376 | F | 0.1590724  | 2.3107436  | -1.4302487 |
| C | -0.0417482 | -4.6358572 | 1.3687721  | C | -0.4923678 | -1.0542677 | -3.6953960 |
| H | -1.0102861 | -4.0222297 | -0.4846930 | F | -1.6658552 | -2.0686049 | -1.9677311 |
| H | 1.1585411  | -5.0377229 | 3.1171515  | C | -4.2080579 | -2.8915192 | 1.3539111  |
| H | 2.7609135  | -2.4022749 | 3.9026427  | F | -2.7782806 | -3.4606852 | 3.1651620  |
| H | 3.1669504  | -4.1030604 | 3.6027316  | F | -5.5649409 | -2.2565628 | -0.4871131 |
| H | 3.9406039  | -2.8122797 | 2.6436634  | C | -3.7491653 | 3.9734850  | 0.9648065  |
| C | 5.8547209  | 0.3913033  | 3.4406589  | F | -3.3117929 | 3.5372215  | 3.2605346  |
| H | 4.2853426  | 0.7534708  | 4.8850720  | F | -4.1490769 | 4.3326969  | -1.3432389 |
| H | 2.0151580  | 0.0390236  | 4.6253775  | C | 0.2417689  | 0.0129922  | -4.2182265 |
| H | 1.5771918  | 1.0836413  | 3.2583839  | F | 1.1797666  | 2.1686938  | -3.9025883 |
| H | 1.3954931  | -0.6815348 | 3.1168068  | F | -0.6863244 | -2.1612979 | -4.4274372 |
| H | 7.2080631  | -0.0337458 | 1.7934530  | F | -5.0911349 | -3.8294224 | 1.7164279  |
| C | 4.0636838  | -1.4538418 | -3.7591748 | F | -4.4844648 | 5.0460929  | 1.2804319  |
| H | 3.2394239  | 0.5275384  | -4.1071920 | F | 0.7755706  | -0.0622699 | -5.4431657 |
| H | 4.8124718  | -3.3781865 | -3.1140820 | P | 2.4907008  | -0.8397554 | 0.5434160  |
| H | 4.4115216  | -3.1076935 | 0.4891413  | C | 1.5500568  | -2.3279182 | 1.0185550  |
| H | 3.2506482  | -4.1190143 | -0.3992615 | C | 3.8187341  | -0.4162167 | 1.6966838  |
| H | 4.9670440  | -4.0946377 | -0.8873421 | C | 3.1556985  | -1.1556660 | -1.1184989 |
| H | -0.6970408 | -5.4958867 | 1.5386473  | C | 0.5655134  | -2.6511340 | 0.0574159  |
| H | 6.6503660  | 0.6978462  | 4.1272467  | C | 1.7667595  | -3.1852005 | 2.1351903  |
| H | 4.4005345  | -1.5913674 | -4.7916165 | C | 3.5345152  | 0.0563216  | 3.0047900  |

**G**·CO<sub>2</sub> : unstable CO<sub>2</sub> adduct of **G**

84

Energy = -3659.927660924

|   |            |            |           |   |           |            |            |
|---|------------|------------|-----------|---|-----------|------------|------------|
| N | 0.0311815  | 0.4061315  | 0.9704876 | H | 0.4593008 | -2.0134849 | -0.8230702 |
| N | 1.3644722  | 0.4435016  | 0.4296563 | C | 0.9004271 | -4.2899258 | 2.2651185  |
| H | -0.0369418 | -0.2655767 | 1.7486877 | C | 2.8706568 | -3.0513238 | 3.1593438  |
| C | 1.9911780  | 1.8439924  | 0.6511707 | C | 4.6281919 | 0.3568562  | 3.8339711  |
| O | 1.2265638  | 2.6037144  | 1.2731968 | C | 2.1287175 | 0.2624821  | 3.5207833  |

|   |            |            |            |   |            |            |            |
|---|------------|------------|------------|---|------------|------------|------------|
| C | 6.2128644  | -0.2386241 | 2.0911197  | F | -3.0122477 | 2.2110745  | -0.9089876 |
| H | 5.3380012  | -0.8600822 | 0.2115044  | C | 0.2189420  | 2.1106382  | -2.9508731 |
| C | 3.4668417  | -0.3113142 | -3.3817009 | F | -0.4084140 | 2.4987029  | -0.7491856 |
| H | 2.6347278  | 0.8442601  | -1.7465517 | C | -0.2128023 | -0.0189883 | -3.9975058 |
| C | 4.1718491  | -2.5601773 | -2.8015227 | F | -1.1947215 | -1.7528482 | -2.7954113 |
| C | 3.9529160  | -3.5408105 | -0.4966784 | C | -4.2658773 | -3.7442735 | -0.5706661 |
| C | -0.1028376 | -4.5790200 | 1.3345500  | F | -2.7211478 | -5.1671366 | 0.5377220  |
| H | -1.0141724 | -3.9845175 | -0.5540671 | F | -5.7415034 | -2.2568727 | -1.6852329 |
| H | 1.0416044  | -4.9551607 | 3.1234665  | C | -3.5733058 | 2.4401680  | 2.6547594  |
| H | 2.6386248  | -2.2892379 | 3.9218170  | F | -2.8378733 | 1.0299981  | 4.4226100  |
| H | 2.9967013  | -4.0108849 | 3.6845012  | F | -4.2884089 | 3.7712753  | 0.8287815  |
| H | 3.8355244  | -2.7747085 | 2.7076439  | C | 0.3114053  | 1.2751366  | -4.0708572 |
| C | 5.9504787  | 0.2084277  | 3.3928265  | F | 0.7011693  | 3.3614439  | -3.0136550 |
| H | 4.4334356  | 0.7177437  | 4.8495347  | F | -0.1015886 | -0.8509268 | -5.0494775 |
| H | 2.1189398  | 0.2745624  | 4.6218877  | F | -5.1504186 | -4.7434736 | -0.6790094 |
| H | 1.7228141  | 1.2286497  | 3.1722517  | F | -4.2277702 | 3.2288199  | 3.5168093  |
| H | 1.4419850  | -0.5395494 | 3.1949665  | F | 0.8814806  | 1.7144363  | -5.1994861 |
| H | 7.2417121  | -0.3409303 | 1.7336560  | P | 2.5498201  | -0.1517780 | 0.5935194  |
| C | 4.0236600  | -1.5416648 | -3.7521090 | C | 2.7476812  | -1.6554599 | -0.4412263 |
| H | 3.3587126  | 0.4968970  | -4.1104377 | C | 3.4100057  | -0.2770019 | 2.2097484  |
| H | 4.6314168  | -3.5106426 | -3.0936438 | C | 3.3721181  | 1.2106323  | -0.3034979 |
| H | 4.2381201  | -3.1875755 | 0.5082467  | C | 2.1419761  | -1.4561109 | -1.7058853 |
| H | 3.0334576  | -4.1429105 | -0.3868114 | C | 3.3341072  | -2.9097389 | -0.1245776 |
| H | 4.7517689  | -4.2074648 | -0.8588037 | C | 2.8320381  | -1.0049494 | 3.2834006  |
| H | -0.7485695 | -5.4497070 | 1.4844867  | C | 4.6194033  | 0.4210837  | 2.4062257  |
| H | 6.7772837  | 0.4523176  | 4.0675088  | C | 2.6591300  | 2.4246221  | -0.3437369 |
| H | 4.3574791  | -1.7075564 | -4.7814094 | C | 4.6289545  | 1.0830144  | -0.9523839 |

**G** : adduct (C<sub>6</sub>F<sub>5</sub>)<sub>3</sub>BNH<sub>2</sub>NP(*o*-Tol)<sub>3</sub>

81

Energy = -3471.438877650

|   |            |            |            |   |           |            |            |
|---|------------|------------|------------|---|-----------|------------|------------|
| N | -0.0010534 | -0.7790333 | 0.4726479  | H | 1.7271424 | -0.4684344 | -1.9372666 |
| N | 0.9670622  | 0.2635509  | 0.6663825  | C | 3.2497675 | -3.9261340 | -1.0995315 |
| H | 0.3636492  | -1.5374843 | -0.1360261 | C | 4.0745460 | -3.2095941 | 1.1588873  |
| H | -0.2261417 | -1.2369723 | 1.3680991  | C | 3.5227769 | -1.0471043 | 4.5066900  |
| B | -1.3932599 | -0.2761697 | -0.2102759 | C | 1.4940544 | -1.6931037 | 3.1630574  |
| C | -2.3694387 | -1.6020468 | -0.3376569 | C | 5.2883635 | 0.3688182  | 3.6354268  |
| C | -2.1543638 | 0.7659833  | 0.8017928  | H | 5.0358941 | 1.0222058  | 1.5930884  |
| C | -0.9038601 | 0.3329721  | -1.6471139 | C | 3.1777896 | 3.5294138  | -1.0271879 |
| C | -2.1225853 | -2.8925569 | 0.1464590  | H | 1.6839467 | 2.4740781  | 0.1467359  |
| C | -3.6232742 | -1.4466816 | -0.9515560 | C | 5.1229636 | 2.2116427  | -1.6356912 |
| C | -2.1964698 | 0.5227631  | 2.1816266  | C | 5.4381684 | -0.1951023 | -0.9684836 |
| C | -2.9081777 | 1.8793143  | 0.3915382  | C | 2.6204897 | -3.7322222 | -2.3352335 |
| C | -0.3698222 | 1.6278664  | -1.7747573 | H | 1.5791696 | -2.3096233 | -3.6128981 |
| C | -0.7951798 | -0.4593882 | -2.8005526 | H | 3.7024246 | -4.8982459 | -0.8752744 |
| C | -3.0300782 | -3.9563406 | 0.0489018  | H | 3.3886614 | -3.3193890 | 2.0155623  |
| F | -0.9339898 | -3.2001339 | 0.7474087  | H | 4.6314868 | -4.1542920 | 1.0570703  |
| C | -4.5646759 | -2.4742587 | -1.0808757 | H | 4.7875806 | -2.4112254 | 1.4211986  |
| F | -3.9620531 | -0.2503398 | -1.4736444 | C | 4.7412394 | -0.3773057 | 4.6865288  |
| C | -2.8614410 | 1.3262105  | 3.1138725  | H | 3.0887684 | -1.6146131 | 5.3374516  |
| F | -1.5772860 | -0.5810203 | 2.6987161  | H | 1.3239485 | -2.3738478 | 4.0119980  |
| C | -3.5982080 | 2.7141764  | 1.2827528  | H | 0.6844133 | -0.9431703 | 3.1602241  |
|   |            |            |            | H | 1.4097123 | -2.2900560 | 2.2369348  |
|   |            |            |            | H | 6.2283268 | 0.9134689  | 3.7685836  |
|   |            |            |            | C | 4.4140067 | 3.4191743  | -1.6772358 |

|   |           |            |            |
|---|-----------|------------|------------|
| H | 2.6096187 | 4.4635388  | -1.0611736 |
| H | 6.0883262 | 2.1332382  | -2.1483426 |
| H | 5.3938546 | -0.7319577 | -0.0067213 |
| H | 5.0674026 | -0.8887144 | -1.7443149 |
| H | 6.4957972 | 0.0240402  | -1.1878157 |
| H | 2.5735533 | -4.5543084 | -3.0564890 |
| H | 5.2537471 | -0.4293739 | 5.6526607  |
| H | 4.8300803 | 4.2738440  | -2.2209130 |

**G.F** : H-bonded complex of **G** and **F**

165

Energy = -7131.423334674

|   |            |            |            |
|---|------------|------------|------------|
| N | -2.6507869 | 0.4109983  | 0.7435666  |
| N | -2.2031562 | -0.9468057 | 0.8752594  |
| H | -3.0459765 | 0.7186378  | 1.6431170  |
| H | -1.6793759 | 0.8958588  | 0.7445564  |
| B | -3.5845095 | 1.1294684  | -0.4747615 |
| C | -2.9355171 | 2.6401229  | -0.5368190 |
| C | -3.3866707 | 0.2645073  | -1.8380461 |
| C | -5.1298068 | 1.1566103  | 0.0814112  |
| C | -2.6885303 | 3.3748595  | 0.6327165  |
| C | -2.6335724 | 3.3219731  | -1.7252716 |
| C | -2.0786880 | -0.0203796 | -2.2527781 |
| C | -4.3925800 | -0.2583304 | -2.6628510 |
| C | -5.7780282 | -0.0658333 | 0.2817524  |
| C | -5.9164285 | 2.2775308  | 0.3928644  |
| C | -2.1883867 | 4.6777644  | 0.6558274  |
| F | -3.0041950 | 2.8307278  | 1.8442875  |
| C | -2.1246266 | 4.6289404  | -1.7536090 |
| F | -2.8390340 | 2.7521689  | -2.9289555 |
| C | -1.7554160 | -0.8066934 | -3.3619107 |
| F | -1.0655202 | 0.5023194  | -1.5346438 |
| C | -4.1243882 | -1.0757864 | -3.7692549 |
| F | -5.7004139 | -0.0071477 | -2.4308800 |
| C | -7.0687531 | -0.2311590 | 0.7812292  |
| F | -5.1039540 | -1.1971999 | -0.0532514 |
| C | -7.2242222 | 2.1760726  | 0.9005479  |
| F | -5.4693565 | 3.5338054  | 0.2068163  |
| C | -1.8945487 | 5.3107886  | -0.5561057 |
| F | -1.9854285 | 5.3304248  | 1.8153712  |
| F | -1.8238366 | 5.2169898  | -2.9215137 |
| C | -2.7998400 | -1.3505948 | -4.1183475 |
| F | -0.4896218 | -1.1087409 | -3.6761210 |
| F | -5.1289581 | -1.6080367 | -4.4836596 |
| C | -7.8020453 | 0.9177383  | 1.1059870  |
| F | -7.5951912 | -1.4514171 | 0.9651531  |
| F | -7.9243923 | 3.2812271  | 1.1891564  |
| F | -1.3962177 | 6.5522879  | -0.5668055 |
| F | -2.5290515 | -2.1612109 | -5.1494988 |
| F | -9.0401388 | 0.8133348  | 1.6000149  |
| P | -2.8796872 | -2.4583377 | 1.0525788  |
| C | -4.2600570 | -2.5350580 | 2.2436743  |

|   |            |            |            |
|---|------------|------------|------------|
| C | -1.5212813 | -3.3400214 | 1.8985621  |
| C | -3.0687147 | -3.2580649 | -0.5823687 |
| C | -4.7395234 | -1.3335782 | 2.8039796  |
| C | -4.7529221 | -3.7844329 | 2.7070569  |
| C | -0.9875876 | -2.8408803 | 3.1221855  |
| C | -1.0803266 | -4.5779100 | 1.3855834  |
| C | -1.8260568 | -3.2283767 | -1.2719189 |
| C | -4.1959047 | -3.8862407 | -1.1705646 |
| C | -5.7343090 | -1.3412950 | 3.7847485  |
| H | -4.3426894 | -0.3747923 | 2.4693518  |
| C | -5.7635617 | -3.7622168 | 3.6875095  |
| C | -4.2289377 | -5.1196315 | 2.2346112  |
| C | -0.0134033 | -3.6243015 | 3.7687935  |
| C | -1.3771633 | -1.5277438 | 3.7577585  |
| C | -0.1177716 | -5.3338633 | 2.0572008  |
| H | -1.4938609 | -4.9591531 | 0.4491698  |
| C | -1.6648396 | -3.8767578 | -2.4955469 |
| H | -0.9688037 | -2.7009742 | -0.8360441 |
| C | -4.0037809 | -4.5089843 | -2.4247997 |
| C | -5.5924497 | -3.9252577 | -0.5921423 |
| C | -6.2570657 | -2.5656069 | 4.2194994  |
| H | -6.1006031 | -0.3964361 | 4.1966517  |
| H | -6.1668617 | -4.7173419 | 4.0407171  |
| H | -3.3746859 | -5.4358315 | 2.8601836  |
| H | -5.0127575 | -5.8893724 | 2.3157842  |
| H | -3.8757165 | -5.0985397 | 1.1926187  |
| C | 0.4206066  | -4.8508032 | 3.2556937  |
| H | 0.4151582  | -3.2494847 | 4.7045496  |
| H | -2.4697090 | -1.4101689 | 3.8352926  |
| H | -0.9592891 | -1.4680789 | 4.7744101  |
| H | -0.9887465 | -0.6727618 | 3.1802921  |
| H | 0.2240670  | -6.2800270 | 1.6305203  |
| C | -2.7661513 | -4.5285155 | -3.0716893 |
| H | -0.6931954 | -3.8559780 | -2.9950585 |
| H | -4.8655781 | -4.9927470 | -2.8973496 |
| H | -5.9578579 | -4.9656080 | -0.5466742 |
| H | -5.6720795 | -3.4765256 | 0.4032340  |
| H | -6.2733525 | -3.3642477 | -1.2557849 |
| H | -7.0454381 | -2.5906165 | 4.9782077  |
| H | 1.1874004  | -5.4229962 | 3.7853465  |
| H | -2.6629715 | -5.0337745 | -4.0366059 |
| N | 3.1298696  | -0.1430453 | 0.9486582  |
| N | 2.0474016  | 0.7014549  | 0.9460564  |
| H | 3.1492250  | -0.7155569 | 1.7921856  |
| C | 0.6907238  | 0.2475657  | 0.9343154  |
| O | 0.4450531  | -0.9805653 | 0.9107300  |
| O | -0.1435651 | 1.2124610  | 0.9936599  |
| H | -1.1156435 | -0.9962662 | 0.8822079  |
| B | 3.8086611  | -0.7799743 | -0.2961141 |
| C | 5.4044979  | -1.0607438 | 0.0596842  |
| C | 3.1764703  | -2.3108589 | -0.5698564 |
| C | 3.6335066  | 0.2404899  | -1.5831134 |

C 6.0561831 -0.8188607 1.2774221  
 C 6.2212692 -1.6260952 -0.9321071  
 C 3.1482359 -3.1982951 0.5165526  
 C 2.7005054 -2.8626797 -1.7679804  
 C 2.3635633 0.4051682 -2.1536134  
 C 4.6227347 1.0484031 -2.1646294  
 C 7.4286052 -1.0393655 1.4737991  
 F 5.4060465 -0.3411393 2.3660198  
 C 7.5887428 -1.8771171 -0.7825874  
 F 5.6892185 -1.9061553 -2.1457288  
 C 2.6992532 -4.5205287 0.4498164  
 F 3.6193795 -2.8050797 1.7312955  
 C 2.1659141 -4.1567110 -1.8677622  
 F 2.7432117 -2.1749053 -2.9298173  
 C 2.0689298 1.2868602 -3.1984246  
 F 1.3350797 -0.3174816 -1.6735260  
 C 4.3819682 1.9563318 -3.2081869  
 F 5.9054727 1.0266702 -1.7274873  
 C 8.2013309 -1.5771974 0.4409498  
 F 8.0034412 -0.7410924 2.6547501  
 F 8.3165282 -2.3941007 -1.7883454  
 C 2.1560887 -4.9939990 -0.7487602  
 F 2.7817792 -5.3357400 1.5203445  
 F 1.6626278 -4.6023383 -3.0390915  
 C 3.0884534 2.0888692 -3.7193882  
 F 0.8100499 1.4398592 -3.6518519  
 F 5.3778259 2.7167579 -3.6940734  
 F 9.5137887 -1.8008581 0.6177382  
 F 1.6527131 -6.2399118 -0.8251585  
 F 2.8202046 2.9826152 -4.6825282  
 P 2.1573335 2.2981249 1.6794278  
 C 3.9171691 2.4990046 2.0796280  
 C 1.0718313 2.3706908 3.1318467  
 C 1.7678501 3.6010893 0.4680459  
 C 4.7280318 2.3771207 0.9294310  
 C 4.5074904 2.7642127 3.3456311  
 C 1.0945024 1.3298219 4.0960728  
 C 0.1345236 3.4161309 3.2170807  
 C 1.1871411 3.1997622 -0.7504318  
 C 2.1320551 4.9589607 0.6838578  
 C 6.1187778 2.4619998 1.0085002  
 H 4.2503235 2.2148180 -0.0396885  
 C 5.9153277 2.8297617 3.3936076  
 C 3.7604377 3.0177872 4.6364291  
 C 0.1841545 1.4210703 5.1649557  
 C 2.0116618 0.1311545 3.9944234  
 C -0.7722431 3.4703355 4.2796019  
 H 0.0987721 4.1755508 2.4321221  
 C 0.9825171 4.1247883 -1.7785800  
 H 0.8825445 2.1625604 -0.8797514  
 C 1.8859305 5.8712081 -0.3595305  
 C 2.7827494 5.4550832 1.9538536

C 6.7154878 2.6658044 2.2585564  
 H 6.7186210 2.3512569 0.1028881  
 H 6.3895029 3.0285915 4.3609585  
 H 3.4352996 2.0784963 5.1152910  
 H 4.4246704 3.5343116 5.3475233  
 H 2.8601157 3.6347472 4.4938210  
 C -0.7377725 2.4722900 5.2632943  
 H 0.1983604 0.6408891 5.9340990  
 H 2.1648381 -0.3227167 4.9868637  
 H 1.5705999 -0.6439197 3.3397962  
 H 3.0017819 0.3832311 3.5773143  
 H -1.5053939 4.2801297 4.3251294  
 C 1.3346913 5.4655607 -1.5812614  
 H 0.5429650 3.7947819 -2.7231376  
 H 2.1426726 6.9247799 -0.2049550  
 H 2.3810172 4.9581888 2.8523494  
 H 3.8713743 5.2679798 1.9357609  
 H 2.6254667 6.5398952 2.0667613  
 H 7.8053246 2.7147572 2.3496115  
 H -1.4357515 2.5052363 6.1063704  
 H 1.1618992 6.2014601 -2.3724696

P(*o*-Tol)<sub>3</sub> : weak phosphine base

43

Energy = -1153.830714853

P 0.2592736 -0.6024812 1.4688497  
 C -1.3326246 -1.5331136 1.6418880  
 C 0.1646163 0.7186898 2.7707408  
 C 1.5448019 -1.8292308 1.9522336  
 C -1.8722495 -1.9414713 0.4017901  
 C -2.0287607 -1.8508019 2.8415472  
 C 0.8923318 0.8776135 3.9834327  
 C -0.7802554 1.7067371 2.4043640  
 C 1.2225434 -3.1157096 2.4280149  
 C 2.9047926 -1.4941797 1.6988211  
 C -3.0711976 -2.6604602 0.3226898  
 H -1.3313065 -1.6809118 -0.5154984  
 C -3.2411599 -2.5622015 2.7381149  
 C -1.5245326 -1.4653845 4.2108170  
 C 0.6293664 2.0235566 4.7656302  
 C 1.9060245 -0.1117479 4.5135523  
 C -1.0426512 2.8184527 3.2099373  
 H -1.3251421 1.5866383 1.4594877  
 C 2.2258520 -4.0552185 2.7004189  
 H 0.1724097 -3.3824023 2.5860742  
 C 3.8965166 -2.4490067 1.9860816  
 C 3.2828109 -0.1439207 1.1344304  
 C -3.7624229 -2.9667838 1.5019901  
 H -3.4637204 -2.9703146 -0.6515352  
 H -3.7827168 -2.8108447 3.6583720  
 H -2.0556750 -2.0327144 4.9925956  
 H -0.4449434 -1.6624105 4.3095070

H -1.6729236 -0.3883661 4.4050956  
 C -0.3223935 2.9823828 4.4014396  
 H 1.1853576 2.1487049 5.7022863  
 H 1.5298317 -1.1468550 4.4876921  
 H 2.8392297 -0.1076577 3.9247790  
 H 2.1653408 0.1388785 5.5550251  
 H -1.7928296 3.5546806 2.9024744  
 C 3.5694836 -3.7170011 2.4884156  
 H 1.9566706 -5.0475565 3.0778849  
 H 4.9464677 -2.1926225 1.8022034  
 H 2.7191818 0.0602105 0.2051180  
 H 3.0361068 0.6776178 1.8330270  
 H 4.3618158 -0.0926842 0.9158115  
 H -4.7061757 -3.5215499 1.4633948  
 H -0.4996832 3.8506269 5.0450373  
 H 4.3626589 -4.4419592 2.7004556

**R** : (tBuO<sub>2</sub>CN)<sub>2</sub> diazo reactant  
 34

Energy = -801.8728949798  
 N 0.3242872 0.4256936 -0.3648209  
 N -0.3166581 -0.3815757 0.3445181  
 C 1.6620137 -0.0110872 -0.6987326  
 O 1.9130245 -0.3660522 -1.8320749  
 O 2.4685025 0.1491665 0.3397149  
 C -1.6539227 0.0535748 0.6805333  
 O -1.8982559 0.4329547 1.8074170  
 O -2.4679790 -0.1392801 -0.3464265  
 C 3.9453112 -0.0969652 0.2247605  
 C 4.1722632 -1.5706538 -0.1249205  
 C 4.5301031 0.8608714 -0.8171842  
 C 4.4391204 0.2309850 1.6340156  
 H 3.6669997 -2.2201475 0.6097157  
 H 3.7944092 -1.8018610 -1.1322517  
 H 5.2540042 -1.7857235 -0.0930887  
 H 4.2838977 1.9049364 -0.5598373  
 H 5.6284486 0.7557388 -0.8249957  
 H 4.1468779 0.6356954 -1.8238695  
 H 5.5307277 0.0831973 1.6881143  
 H 4.2109619 1.2790533 1.8890354  
 H 3.9553442 -0.4266624 2.3750227  
 C -3.9467819 0.0909020 -0.2226474  
 C -4.5088597 -0.8482712 0.8483970  
 C -4.1893118 1.5697589 0.0930313  
 C -4.4501250 -0.2782786 -1.6182407  
 H -4.2510563 -1.8950938 0.6146442  
 H -4.1193620 -0.5930530 1.8454473  
 H -5.6084076 -0.7575411 0.8641087  
 H -3.6999385 2.2073665 -0.6624717  
 H -5.2740186 1.7702325 0.0672293  
 H -3.8043121 1.8304311 1.0904168  
 H -5.5439709 -0.1452894 -1.6649864

H -3.9819645 0.3665128 -2.3802389  
 H -4.2113722 -1.3295347 -1.8493345

tBe : alkene CH<sub>2</sub>=CMe<sub>2</sub>

12  
 Energy = -157.1529051957  
 C -0.0447611 -0.0266577 -0.1021160  
 C -1.2918400 -0.5013708 -0.2854987  
 C 1.1579313 -0.9379208 -0.0264754  
 C 0.2389673 1.4503869 0.0408385  
 H -2.1582677 0.1694255 -0.3389055  
 H -1.4864933 -1.5761435 -0.3879940  
 H 1.8921625 -0.6847244 -0.8156537  
 H 1.6829962 -0.8147869 0.9405132  
 H 0.8781054 -1.9983855 -0.1383359  
 H 0.7304777 1.6632401 1.0098883  
 H 0.9378768 1.7933921 -0.7464249  
 H -0.6812817 2.0540889 -0.0231284

tBu<sup>+</sup> : CMe<sub>3</sub><sup>+</sup> carbocation

13  
 Energy = -157.5226596561  
 C 0.0022371 -0.0019212 -0.0132734  
 C -1.3725251 -0.5100299 -0.0113428  
 C 1.1397128 -0.9259267 0.0113972  
 C 0.2413120 1.4419515 0.0029942  
 H -2.0983858 0.2133233 -0.4168201  
 H -1.4761900 -1.5155199 -0.4451828  
 H -1.6189225 -0.5988062 1.0759002  
 H 2.0670273 -0.4762191 -0.3789672  
 H 1.3249352 -1.0864472 1.1025600  
 H 0.9216430 -1.9124478 -0.4235769  
 H 1.2175359 1.7242478 0.4273601  
 H 0.2931309 1.6931378 -1.0866802  
 H -0.5989719 2.0255384 0.4106046

TMPH<sup>+</sup> : N-protonated TMP base

30  
 Energy = -409.4121063455  
 N 0.8829134 0.3844648 -0.0000723  
 C 0.2150871 0.0241036 1.3544395  
 C 0.2148481 0.0241037 -1.3544762  
 H 1.8435650 0.0058581 -0.0001662  
 C -1.2577770 0.4644521 1.2607591  
 C 0.3792312 -1.4747467 1.6340709  
 C 0.9799796 0.8441694 2.4030381  
 C 0.3789954 -1.4747253 -1.6342222  
 C 0.9794860 0.8442772 -2.4031745  
 C -1.2580294 0.4643720 -1.2605121  
 C -1.9692868 -0.0431274 0.0002110  
 H -1.2999162 1.5702386 1.2824516  
 H -1.7666271 0.1123777 2.1737196

H -0.2614243 -2.1039258 1.0008625  
 H 1.4281541 -1.7952288 1.5094744  
 H 0.0963435 -1.6581349 2.6827329  
 H 0.9265683 1.9260233 2.1858948  
 H 0.5242103 0.6767469 3.3918215  
 H 2.0398490 0.5398965 2.4612939  
 H 1.4279192 -1.7952383 -1.5097022  
 H -0.2616414 -2.1039224 -1.0010125  
 H 0.0959613 -1.6580215 -2.6828558  
 H 0.9260131 1.9261085 -2.1859158  
 H 2.0393786 0.5401134 -2.4616159  
 H 0.5234883 0.6768818 -3.3918571  
 H -1.3002256 1.5701508 -1.2823375  
 H -1.7671378 0.1122056 -2.1733003  
 H -2.0248613 -1.1462251 0.0002425  
 H -3.0106026 0.3182467 0.0002971  
 H 0.9969401 1.4107824 -0.0000888

TMP : bulky tetramethylpiperidine base  
 29

Energy = -408.9798401783

N 0.8649460 0.4036311 0.0000008  
 C 0.2502816 0.0257485 1.2904480  
 C 0.2503208 0.0257428 -1.2904610  
 H 1.8555511 0.1377890 0.0000052  
 C -1.2313534 0.4639018 1.2555219  
 C 0.3681540 -1.4787706 1.6500503  
 C 0.9970300 0.8349619 2.3678985  
 C 0.3682085 -1.4787939 -1.6500133  
 C 0.9969955 0.8350411 -2.3679372  
 C -1.2313130 0.4638858 -1.2555355  
 C -1.9596259 -0.0309848 -0.0000179  
 H -1.2625643 1.5698223 1.2697322  
 H -1.7365163 0.1097658 2.1726933  
 H -0.2568869 -2.1164783 1.0053416  
 H 1.4157136 -1.8147163 1.5466061  
 H 0.0561439 -1.6518981 2.6960294  
 H 0.9520790 1.9104340 2.1281352  
 H 0.5561391 0.6672457 3.3665248  
 H 2.0609045 0.5351632 2.4119251  
 H 1.4157417 -1.8147782 -1.5464432  
 H -0.2569175 -2.1164504 -1.0053368  
 H 0.0562812 -1.6519749 -2.6960038  
 H 0.9517732 1.9104832 -2.1281093  
 H 2.0608958 0.5353529 -2.4120339  
 H 0.5560113 0.6673043 -3.3665202  
 H -1.2624724 1.5698002 -1.2697240  
 H -1.7364914 0.1097825 -2.1727118  
 H -2.0174535 -1.1359339 -0.0000220  
 H -3.0029665 0.3333928 -0.0000422

TS1 : activated R tBu deprotonation with TMP

97

Energy = -3417.815896361

N -2.9090536 -0.7270709 0.5946510  
 N -3.7294453 0.1648074 0.2863963  
 C -1.5273799 -0.2731333 0.4808982  
 O -0.8521068 -0.5792401 1.5401691  
 O -1.1214669 0.2381047 -0.5586541  
 C -5.1007073 -0.2689750 0.1914092  
 O -5.5550790 -0.5398970 -0.9081510  
 O -5.7050109 -0.1917914 1.3630476  
 C -1.7535759 0.3080216 -2.9321988  
 C -2.6874032 -0.8583076 -2.9831365  
 C -2.3638394 1.6574339 -2.7398474  
 C -0.4068779 0.1576318 -3.2952514  
 H -2.1725521 -1.8117646 -2.7900858  
 H -3.5344054 -0.7362013 -2.2907236  
 H -3.1214844 -0.9032028 -4.0028674  
 H -1.6132436 2.4602009 -2.7036597  
 H -3.0858715 1.8591614 -3.5562602  
 H -2.9372421 1.6478834 -1.7955331  
 H -0.3892666 0.2507852 -4.6051148  
 H 0.2708930 0.9675307 -2.9971156  
 H 0.0199680 -0.8434654 -3.1508872  
 C -7.1853844 -0.4299204 1.5047802  
 C -7.9346640 0.6077487 0.6639395  
 C -7.4919195 -1.8702450 1.0885384  
 C -7.4057795 -0.2134364 3.0023912  
 H -7.6303102 1.6279716 0.9521373  
 H -7.7455530 0.4618770 -0.4114382  
 H -9.0177518 0.5047919 0.8493048  
 H -6.8705609 -2.5757439 1.6647193  
 H -8.5530238 -2.0868031 1.3025546  
 H -7.3091630 -2.0206494 0.0131101  
 H -8.4714235 -0.3638595 3.2446282  
 H -6.8047167 -0.9283893 3.5886273  
 H -7.1184333 0.8105858 3.2916907  
 B 0.6465474 -0.2210133 1.6269772  
 C 0.8716126 1.4052189 1.7253433  
 C 1.1285666 -0.8301121 3.0769239  
 C 1.3574091 -0.9312881 0.3212503  
 C -0.1203573 2.3926799 1.7931850  
 C 2.1836168 1.8822861 1.8623632  
 C 0.3755104 -0.5202662 4.2223354  
 C 2.2870749 -1.5811017 3.3178031  
 C 1.2809646 -2.3280571 0.1901459  
 C 1.9516308 -0.2733664 -0.7663417  
 C 0.1641322 3.7584454 1.9454963  
 C 2.5174506 3.2309455 2.0162137  
 C 0.7066762 -0.9546242 5.5119502  
 C 2.6609076 -2.0325601 4.5921367  
 C 1.7737804 -3.0448389 -0.9100839  
 C 2.4821903 -0.9491738 -1.8765088

|   |            |            |            |   |            |            |            |
|---|------------|------------|------------|---|------------|------------|------------|
| C | 1.4899921  | 4.1827153  | 2.0615578  | N | 0.4400600  | -1.5194326 | -0.6949708 |
| C | 1.8643411  | -1.7174396 | 5.6978509  | C | -1.4852799 | -2.2249995 | 0.2816686  |
| C | 2.3805134  | -2.3418691 | -1.9590156 | O | -2.2936739 | -1.1950101 | 0.1711279  |
| F | -1.4334452 | 2.0849071  | 1.7155243  | O | -1.7376154 | -3.4081490 | 0.3736016  |
| F | 3.2133374  | 1.0043994  | 1.8224119  | C | 1.7079328  | -0.8234911 | -0.5883161 |
| F | -0.7259907 | 0.2527540  | 4.1206405  | O | 2.6615540  | -1.4823414 | -0.0180357 |
| F | 3.1246036  | -1.9184656 | 2.3117054  | O | 1.7419188  | 0.3006915  | -1.0885655 |
| F | 0.7015413  | -3.0600587 | 1.1656482  | C | -0.0652617 | 1.9733369  | -0.6029568 |
| F | 2.0126388  | 1.0774512  | -0.8295831 | C | -0.9596698 | 1.4313836  | -1.6647832 |
| F | -0.8303931 | 4.6636776  | 1.9939265  | C | -0.2968286 | 1.5246881  | 0.8013469  |
| F | 3.7994167  | 3.6215370  | 2.1240570  | C | 0.7508123  | 3.0896561  | -0.8442387 |
| F | -0.0583004 | -0.6296210 | 6.5697240  | H | -1.0518785 | 0.3391532  | -1.5739838 |
| F | 3.7806509  | -2.7581181 | 4.7611075  | H | -1.9803737 | 1.8352547  | -1.5110468 |
| F | 1.6680520  | -4.3827225 | -0.9726068 | H | -0.6169044 | 1.6978446  | -2.6748355 |
| F | 3.0149559  | -0.2610982 | -2.9106311 | H | 0.5818377  | 1.6734624  | 1.4426776  |
| F | 1.7768370  | 5.4873289  | 2.2094797  | H | -1.1235204 | 2.1338458  | 1.2144570  |
| F | 2.2077501  | -2.1407151 | 6.9245762  | H | -0.6357435 | 0.4821080  | 0.8583164  |
| F | 2.8440116  | -2.9923487 | -3.0411353 | H | -0.0909251 | 4.0536785  | -0.5275917 |
| N | -0.1709698 | 0.3160423  | -6.0695701 | H | 1.5586720  | 3.2681546  | -0.1236366 |
| C | 0.6783163  | 1.5362822  | -6.3445086 | H | 1.0301743  | 3.2902176  | -1.8867900 |
| C | 0.2955328  | -1.0483487 | -6.5217520 | B | -3.8094279 | -1.3071246 | -0.0125288 |
| H | -1.1212905 | 0.4816164  | -6.4305475 | C | -4.5923493 | -1.7272356 | 1.3651863  |
| C | 2.0968538  | 1.2433011  | -5.8097120 | C | -4.2356338 | 0.2710557  | -0.3084427 |
| C | 0.6986814  | 1.9190786  | -7.8405558 | C | -4.0331760 | -2.3303328 | -1.2768609 |
| C | 0.0385174  | 2.7055492  | -5.5711565 | C | -4.0120251 | -1.9701061 | 2.6164842  |
| C | 0.2414282  | -1.2170663 | -8.0565213 | C | -5.9943902 | -1.7510230 | 1.3456109  |
| C | -0.6719958 | -2.0766382 | -5.9082694 | C | -3.7946241 | 1.2515937  | 0.5960431  |
| C | 1.7253845  | -1.2489239 | -5.9735483 | C | -4.9664676 | 0.7630246  | -1.3988488 |
| C | 2.6669658  | -0.0886674 | -6.3155434 | C | -3.4748406 | -2.0130564 | -2.5248040 |
| H | 2.0646735  | 1.2204869  | -4.7063813 | C | -4.6192303 | -3.6018611 | -1.2069929 |
| H | 2.7544484  | 2.0830715  | -6.0909009 | C | -4.7675554 | -2.2529074 | 3.7664063  |
| H | 1.3143560  | 1.2427932  | -8.4504550 | C | -6.7893002 | -2.0298814 | 2.4613097  |
| H | -0.3233932 | 1.9334155  | -8.2590227 | C | -3.9567970 | 2.6265012  | 0.3848663  |
| H | 1.1196264  | 2.9336477  | -7.9409978 | C | -5.1674432 | 2.1328552  | -1.6411287 |
| H | 0.0377746  | 2.5238244  | -4.4866643 | C | -3.5144193 | -2.8543198 | -3.6417842 |
| H | 0.6107776  | 3.6281892  | -5.7590457 | C | -4.6876787 | -4.4806983 | -2.2986735 |
| H | -1.0020194 | 2.8786093  | -5.9014887 | C | -6.1635031 | -2.2816481 | 3.6890842  |
| H | -0.7306977 | -0.8779529 | -8.4574895 | C | -4.6481850 | 3.0716515  | -0.7451982 |
| H | 1.0413517  | -0.6740140 | -8.5778013 | C | -4.1287593 | -4.1064325 | -3.5244521 |
| H | 0.3532508  | -2.2862531 | -8.3003172 | F | -2.6757408 | -1.9329203 | 2.7926532  |
| H | -0.6578281 | -2.0467266 | -4.8087044 | F | -6.6415768 | -1.5083340 | 0.1803150  |
| H | -1.7082000 | -1.9031818 | -6.2540087 | F | -3.1539860 | 0.8987554  | 1.7296219  |
| H | -0.3766635 | -3.0915701 | -6.2227256 | F | -5.5141720 | -0.0682350 | -2.3041358 |
| H | 1.6776633  | -1.3516599 | -4.8764667 | F | -2.8579795 | -0.8198401 | -2.7053675 |
| H | 2.1197691  | -2.2038705 | -6.3623709 | F | -5.1492899 | -4.0690153 | -0.0578450 |
| H | 2.8443616  | -0.0438090 | -7.4056294 | F | -4.1616755 | -2.4825895 | 4.9452366  |
| H | 3.6492964  | -0.2679204 | -5.8462074 | F | -8.1322905 | -2.0519391 | 2.3745231  |
|   |            |            |            | F | -3.4239863 | 3.5366065  | 1.2412470  |
|   |            |            |            | F | -5.8454843 | 2.5509770  | -2.7224266 |
|   |            |            |            | F | -2.9722291 | -2.4790089 | -4.8137867 |
|   |            |            |            | F | -5.2690046 | -5.6873617 | -2.1718444 |
|   |            |            |            | F | -6.8989698 | -2.5477417 | 4.7818723  |

**TS2<sup>‡</sup>**: activated B<sup>‡</sup> tBu deprotonation with TMP  
118  
Energy = -5467.166210782  
N -0.1273769 -1.7155251 0.4042308



F -4.8014239 4.3914788 -0.9714240  
 F -4.1827570 -4.9370774 -4.5781815  
 B 4.0799652 -0.9108818 0.1500617  
 C 4.9571164 -1.1133814 -1.2246564  
 C 3.9435140 0.6566380 0.6434456  
 C 4.7570749 -1.9009488 1.2815786  
 C 4.4959341 -1.6314529 -2.4417511  
 C 6.3322464 -0.8369241 -1.1843651  
 C 4.4126834 1.7881873 -0.0381960  
 C 3.2267035 0.9364650 1.8168583  
 C 4.6734003 -3.2909081 1.0918000  
 C 5.4782529 -1.5029333 2.4153533  
 C 5.3332695 -1.8518440 -3.5479496  
 C 7.2051502 -1.0362725 -2.2581432  
 C 4.2259788 3.1005809 0.4235486  
 C 3.0061866 2.2270465 2.3123646  
 C 5.2181733 -4.2300246 1.9782162  
 C 6.0435655 -2.4059937 3.3277406  
 C 6.6965371 -1.5565211 -3.4550056  
 C 3.5243605 3.3211577 1.6117060  
 C 5.9123765 -3.7807635 3.1073996  
 F 3.1982253 -1.9526064 -2.6270330  
 F 6.8704189 -0.3156520 -0.0564750  
 F 5.0561023 1.6852307 -1.2189459  
 F 2.6805660 -0.0738367 2.5254127  
 F 4.0598094 -3.7923119 0.0007838  
 F 5.6782858 -0.1955326 2.6955925  
 F 4.8362373 -2.3500370 -4.6944500  
 F 8.5137186 -0.7381038 -2.1575791  
 F 4.6723051 4.1555175 -0.2858381  
 F 2.2683582 2.4315330 3.4214304  
 F 5.1007019 -5.5496834 1.7465606  
 F 6.7185663 -1.9630855 4.4048577  
 F 7.5098818 -1.7623156 -4.5047243  
 F 3.3156274 4.5770409 2.0537770  
 F 6.4499525 -4.6603817 3.9684170  
 N -0.9478747 5.2223341 -0.1638220  
 C -0.2995068 5.9227473 1.0069087  
 C -1.2158894 5.9798785 -1.4404275  
 H -1.8222121 4.7845758 0.1594129  
 C 1.0061571 6.5626811 0.4892788  
 C -1.2279625 6.9676341 1.6650410  
 C -0.0014349 4.8461120 2.0652048  
 C -2.3406198 7.0282868 -1.2913898  
 C -1.6814912 4.9505226 -2.4877637  
 C 0.1181788 6.6238506 -1.8742446  
 C 0.7844856 7.4338966 -0.7542564  
 H 1.7274637 5.7604902 0.2502293  
 H 1.4559099 7.1504272 1.3081932  
 H -1.3330301 7.8887922 1.0748166  
 H -2.2333360 6.5444325 1.8339866  
 H -0.8083705 7.2460031 2.6464102

H 0.6564928 4.0589048 1.6762941  
 H 0.5071150 5.3045628 2.9279340  
 H -0.9362385 4.3812489 2.4245238  
 H -3.2226617 6.5842168 -0.8002424  
 H -2.0317989 7.9165506 -0.7228386  
 H -2.6475474 7.3651077 -2.2960742  
 H -0.9272315 4.1687171 -2.6576822  
 H -2.6270068 4.4749880 -2.1778656  
 H -1.8629996 5.4618338 -3.4472510  
 H 0.8063491 5.8193379 -2.1942310  
 H -0.0690278 7.2550223 -2.7605292  
 H 0.1663641 8.3149544 -0.5003878  
 H 1.7529248 7.8278497 -1.1084764

**TS3** : activated R tBu proton transfer to N-atom  
68

Energy = -3008.804885032

N -2.4233044 0.3838435 -1.3979749  
 N -3.2036490 0.6704927 -0.4800968  
 C -0.9676922 0.5611043 -1.1696585  
 O -0.5677954 0.0073749 -0.0963582  
 O -0.4162821 1.1692715 -2.0734537  
 C -4.6319941 0.5732623 -0.8880877  
 O -4.9948853 0.1700933 -1.9734214  
 O -5.3286333 0.9827624 0.1465497  
 C -1.6654179 0.1830385 -4.5963046  
 C -1.4406875 1.5796123 -5.0752667  
 C -0.5130386 -0.7653737 -4.6550155  
 C -2.8941267 -0.2060142 -4.0771994  
 H -2.2882654 2.2426967 -4.8449224  
 H -0.5129812 1.9909039 -4.6438622  
 H -1.3063308 1.5539529 -6.1750802  
 H -0.6531532 -1.6410166 -4.0038884  
 H -0.4233332 -1.1325729 -5.6973289  
 H 0.4322442 -0.2586153 -4.4062801  
 H -3.7730203 0.4259148 -4.2552184  
 H -3.0941280 -1.2765992 -3.9285252  
 H -2.6829970 0.1194274 -2.7782627  
 C -6.8371796 1.0017259 0.1202484  
 C -7.2939443 1.9518430 -0.9899073  
 C -7.3361802 -0.4325040 -0.0730024  
 C -7.1746203 1.5426226 1.5087869  
 H -6.8503536 2.9517329 -0.8487862  
 H -7.0234755 1.5681277 -1.9853485  
 H -8.3912576 2.0507485 -0.9393881  
 H -6.9239614 -1.0932962 0.7076474  
 H -8.4356049 -0.4379362 0.0147304  
 H -7.0626153 -0.8235710 -1.0647990  
 H -8.2695188 1.6057646 1.6206435  
 H -6.7767544 0.8764185 2.2916654  
 H -6.7461122 2.5487517 1.6474045  
 B 0.9203002 -0.0817992 0.3726230

|   |            |            |            |   |            |            |            |
|---|------------|------------|------------|---|------------|------------|------------|
| C | 1.2894627  | 1.2740370  | 1.2127980  | H | 0.9213051  | -5.1959516 | -1.0811202 |
| C | 0.8838359  | -1.3408936 | 1.4260302  | H | -1.0696938 | -4.6289638 | -4.2990994 |
| C | 1.8310882  | -0.3596911 | -0.9605505 | H | -1.9417091 | -3.7058277 | -3.0316973 |
| C | 0.5145355  | 2.4366383  | 1.3092841  | H | -0.9181414 | -2.8453727 | -4.2210568 |
| C | 2.4592761  | 1.2769857  | 1.9891686  | B | -1.6861346 | -0.1192879 | 0.6548530  |
| C | -0.0867335 | -1.3450961 | 2.4422043  | C | -1.2063671 | 1.4590661  | 0.6058556  |
| C | 1.7755205  | -2.4221944 | 1.4502598  | C | -3.2007947 | -0.1245787 | -0.0001032 |
| C | 1.4972476  | -1.4327562 | -1.8010889 | C | -1.5835424 | -0.8829809 | 2.1000209  |
| C | 2.9401556  | 0.3875914  | -1.3807841 | C | -0.8426057 | 2.0095384  | -0.6296392 |
| C | 0.8642329  | 3.5294336  | 2.1177586  | C | -1.2208642 | 2.3713105  | 1.6725503  |
| C | 2.8523555  | 2.3415977  | 2.8063392  | C | -3.6086287 | -0.6351183 | -1.2378206 |
| C | -0.2032096 | -2.3635019 | 3.3975259  | C | -4.2215982 | 0.5135378  | 0.7249809  |
| C | 1.6987122  | -3.4616618 | 2.3890198  | C | -2.4712751 | -1.8942537 | 2.4980308  |
| C | 2.2104601  | -1.7833692 | -2.9500282 | C | -0.4940169 | -0.6903019 | 2.9612222  |
| C | 3.6898744  | 0.0753643  | -2.5264014 | C | -0.4633669 | 3.3399598  | -0.8271282 |
| C | 2.0391593  | 3.4805453  | 2.8742428  | F | -0.8683413 | 1.2247639  | -1.7446870 |
| C | 0.7016048  | -3.4316339 | 3.3702064  | C | -0.8772413 | 3.7220759  | 1.5199439  |
| C | 3.3199986  | -1.0143815 | -3.3216130 | F | -1.5638640 | 1.9873974  | 2.9157686  |
| F | -0.6381531 | 2.5794629  | 0.6124850  | C | -4.9153182 | -0.5355100 | -1.7363579 |
| F | 3.2899005  | 0.2116927  | 1.9398522  | F | -2.7319262 | -1.2880645 | -2.0567413 |
| F | -0.9664755 | -0.3269360 | 2.5437775  | C | -5.5422011 | 0.6353141  | 0.2791844  |
| F | 2.7827156  | -2.5157265 | 0.5558552  | F | -3.9439671 | 1.0351494  | 1.9379520  |
| F | 0.4093051  | -2.1939362 | -1.5167050 | C | -2.3224050 | -2.6313752 | 3.6829708  |
| F | 3.3552181  | 1.4727217  | -0.6986286 | F | -3.5291718 | -2.2335281 | 1.7288924  |
| F | 0.0794649  | 4.6189715  | 2.1698223  | C | -0.2957358 | -1.4036086 | 4.1476397  |
| F | 3.9896453  | 2.2864926  | 3.5175113  | F | 0.4459487  | 0.2293113  | 2.6551437  |
| F | -1.1580593 | -2.3182028 | 4.3419396  | C | -0.4932190 | 4.2105331  | 0.2661245  |
| F | 2.5765996  | -4.4780406 | 2.3599397  | F | -0.0723680 | 3.7739193  | -2.0364130 |
| F | 1.8147400  | -2.8117925 | -3.7232007 | F | -0.8665120 | 4.5457781  | 2.5802259  |
| F | 4.7462530  | 0.8257081  | -2.8758266 | C | -5.8927473 | 0.1067571  | -0.9700651 |
| F | 2.3890453  | 4.5165925  | 3.6496491  | F | -5.2302365 | -1.0518118 | -2.9341595 |
| F | 0.6133376  | -4.4158094 | 4.2762157  | F | -6.4679410 | 1.2498233  | 1.0293330  |
| F | 4.0130108  | -1.3159531 | -4.4282499 | C | -1.2214023 | -2.3888985 | 4.5117542  |

**TS4** : phosphine addition to  $B(C_6F_5)_3$  adduct E  
96

Energy = -3817.074134533

|   |            |            |            |   |            |            |            |
|---|------------|------------|------------|---|------------|------------|------------|
| N | -0.7209038 | -0.9449272 | -0.2930887 | F | -1.0545987 | -3.0912086 | 5.6395675  |
| N | 0.3977699  | -1.4355242 | 0.0690171  | P | 2.6744546  | 0.0354438  | -0.3541394 |
| H | -1.0052935 | -1.1261750 | -1.2708903 | C | 2.6929659  | 1.8752472  | -0.1566592 |
| C | 0.9472813  | -2.4339784 | -0.8438935 | C | 2.9294091  | -0.3852462 | -2.1205675 |
| O | 1.9979106  | -2.9906881 | -0.5981191 | C | 4.1774319  | -0.3603467 | 0.6415501  |
| O | 0.1091024  | -2.6839676 | -1.8461375 | C | 2.3177560  | 2.2248470  | 1.1638303  |
| C | 0.1995605  | -3.9203405 | -2.6984784 | C | 3.1180674  | 2.8937386  | -1.0548721 |
| C | 1.5126978  | -3.9045935 | -3.4781585 | C | 3.9131680  | -1.2491568 | -2.6796018 |
| C | 0.0660527  | -5.1306742 | -1.7716851 | C | 1.9307022  | 0.1689310  | -2.9586701 |
| C | -1.0108680 | -3.7638660 | -3.6181629 | C | 5.3576580  | 0.3506447  | 0.3215642  |
| H | 1.5998792  | -2.9758913 | -4.0625451 | C | 4.1592179  | -1.2574723 | 1.7357053  |
| H | 2.3770601  | -3.9831445 | -2.8031612 | C | 2.3336486  | 3.5476425  | 1.6072111  |
| H | 1.5224249  | -4.7608286 | -4.1741131 | H | 2.0322948  | 1.4304396  | 1.8571884  |
| H | -0.8697554 | -5.0710844 | -1.1905867 | C | 3.0954183  | 4.2256199  | -0.5846427 |
| H | 0.0380700  | -6.0491521 | -2.3816835 | C | 3.6397522  | 2.6707993  | -2.4566440 |

|   |           |            |            |   |            |            |            |
|---|-----------|------------|------------|---|------------|------------|------------|
| C | 3.9193754 | -1.4035961 | -4.0817942 | B | -1.3207457 | 0.1712743  | 0.0407123  |
| C | 4.9265326 | -2.0274179 | -1.8722168 | C | -2.4643003 | -0.9401645 | 0.5024872  |
| C | 1.9487408 | -0.0225986 | -4.3419035 | C | -2.0186259 | 1.6534421  | 0.3761467  |
| H | 1.1483375 | 0.7941232  | -2.5183760 | C | -0.8759647 | 0.0270739  | -1.5493308 |
| C | 6.5382535 | 0.1402257  | 1.0353636  | C | -2.3789848 | -1.8276156 | 1.5860614  |
| H | 5.3436686 | 1.0764719  | -0.4981558 | C | -3.6720234 | -1.0141639 | -0.2093847 |
| C | 5.3673592 | -1.4487576 | 2.4443863  | C | -2.1143894 | 2.0673593  | 1.7132275  |
| C | 2.9244262 | -1.9931414 | 2.1956994  | C | -2.5785331 | 2.5533317  | -0.5415319 |
| C | 2.7129958 | 4.5616782  | 0.7169227  | C | -0.1635772 | 1.0503660  | -2.1928781 |
| H | 2.0355818 | 3.7844608  | 2.6332078  | C | -1.0891438 | -1.0981590 | -2.3612823 |
| H | 3.4166569 | 5.0181265  | -1.2699099 | C | -3.3742011 | -2.7688344 | 1.8939227  |
| H | 4.3003502 | 3.5060291  | -2.7410466 | F | -1.3127839 | -1.8529820 | 2.4231378  |
| H | 4.2013682 | 1.7297903  | -2.5552714 | C | -4.6977162 | -1.9251016 | 0.0634039  |
| H | 2.8166255 | 2.6321620  | -3.1917227 | F | -3.8660553 | -0.1944691 | -1.2683905 |
| C | 2.9717094 | -0.7932697 | -4.9120271 | C | -2.6499951 | 3.2916093  | 2.1269938  |
| H | 4.6868443 | -2.0473383 | -4.5262895 | F | -1.6770897 | 1.2568968  | 2.7149746  |
| H | 5.7390180 | -1.3853977 | -1.4924847 | C | -3.1279818 | 3.7934477  | -0.1822530 |
| H | 4.4534363 | -2.5090516 | -1.0030501 | F | -2.6084403 | 2.2769147  | -1.8665627 |
| H | 5.3786248 | -2.8103262 | -2.5028203 | C | 0.2872454  | 0.9932765  | -3.5141185 |
| H | 1.1744843 | 0.4340391  | -4.9665696 | F | 0.1477299  | 2.1918212  | -1.5303018 |
| C | 6.5421775 | -0.7757130 | 2.1007959  | C | -0.6447738 | -1.2143718 | -3.6884524 |
| H | 7.4456389 | 0.6924549  | 0.7702552  | F | -1.7407075 | -2.1903186 | -1.8938333 |
| H | 5.3689459 | -2.1392387 | 3.2955454  | C | -4.5445772 | -2.8176859 | 1.1319920  |
| H | 2.0136659 | -1.5966014 | 1.7277022  | F | -3.2068732 | -3.6230529 | 2.9214992  |
| H | 2.9910569 | -3.0635256 | 1.9340750  | F | -5.8165579 | -1.9564475 | -0.6814850 |
| H | 2.8239289 | -1.9158725 | 3.2915672  | C | -3.1648136 | 4.1675584  | 1.1644735  |
| H | 2.7150550 | 5.6087362  | 1.0346401  | F | -2.6899305 | 3.6268623  | 3.4299873  |
| H | 3.0155159 | -0.9448757 | -5.9955260 | F | -3.6304705 | 4.6203472  | -1.1184401 |
| H | 7.4585769 | -0.9484151 | 2.6751610  | C | 0.0649194  | -0.1608836 | -4.2692432 |

**TS5a** : direct ester tBu deprotonation of **4**  
96

Energy = -3817.063242761

|   |            |            |            |   |            |            |            |
|---|------------|------------|------------|---|------------|------------|------------|
| N | -0.0537304 | -0.0797023 | 0.8994610  | F | 0.5461335  | -0.2592175 | -5.5169454 |
| N | 1.2224385  | 0.2814047  | 0.5264394  | P | 2.4925245  | -0.9249564 | 0.5466718  |
| H | -0.1820601 | 0.0300187  | 1.9051125  | C | 1.6478746  | -2.4621388 | 0.9989542  |
| C | 1.7067411  | 1.6241067  | 0.6606336  | C | 3.7738715  | -0.3866559 | 1.7071480  |
| O | 0.9360150  | 2.4616145  | 1.2162341  | C | 3.1933438  | -1.1760009 | -1.1132648 |
| O | 2.8682906  | 1.8277995  | 0.2128406  | C | 0.6219266  | -2.7758237 | 0.0792338  |
| C | 3.1749915  | 4.1020989  | -0.3470205 | C | 1.8960569  | -3.3051722 | 2.1149267  |
| C | 4.4132757  | 4.1053609  | 0.4885795  | C | 3.4144955  | 0.0656802  | 3.0047785  |
| C | 3.2898825  | 3.7029991  | -1.7817770 | C | 5.1103728  | -0.3424616 | 1.2658057  |
| C | 1.9769329  | 4.6806677  | 0.1466377  | C | 2.9349024  | -0.1815765 | -2.0754029 |
| H | 5.0398684  | 3.2249783  | 0.2826733  | C | 3.9273730  | -2.3451666 | -1.4560478 |
| H | 4.9909286  | 5.0146389  | 0.2221145  | C | -0.2025251 | -3.8855178 | 0.2664375  |
| H | 4.1784635  | 4.1561295  | 1.5628332  | H | 0.4769341  | -2.1364559 | -0.7938517 |
| H | 3.6631849  | 4.5904542  | -2.3343376 | C | 1.0341372  | -4.4085650 | 2.2843316  |
| H | 4.0115397  | 2.8848601  | -1.9233556 | C | 3.0250195  | -3.1417688 | 3.1083477  |
| H | 2.3147500  | 3.4296780  | -2.2105290 | C | 4.4517579  | 0.5221180  | 3.8379735  |
| H | 1.2329950  | 4.9855929  | -0.6026983 | C | 1.9870489  | 0.0997504  | 3.5041441  |
| H | 1.4593769  | 3.6976893  | 0.6933406  | C | 6.1194632  | 0.1160797  | 2.1180438  |
| H | 2.0881838  | 5.3660557  | 1.0003106  | H | 5.3533646  | -0.6550840 | 0.2455043  |

C 3.3766349 -0.3335430 -3.3936741  
 H 2.3957867 0.7139585 -1.7687248  
 C 4.3665176 -2.4657419 -2.7881056  
 C 4.2427459 -3.4487037 -0.4733422  
 C -0.0089442 -4.6907052 1.3958827  
 H -0.9953341 -4.0963200 -0.4547374  
 H 1.2046822 -5.0699039 3.1408291  
 H 2.7670789 -2.4273977 3.9090246  
 H 3.2321454 -4.1105197 3.5903749  
 H 3.9543748 -2.7823872 2.6412220  
 C 5.7858385 0.5470248 3.4100735  
 H 4.2005460 0.8666391 4.8471582  
 H 1.9649945 0.0607261 4.6049835  
 H 1.4842938 1.0349023 3.1945931  
 H 1.3810769 -0.7394770 3.1213458  
 H 7.1578116 0.1410309 1.7734799  
 C 4.0906538 -1.4846957 -3.7498767  
 H 3.1518798 0.4386221 -4.1349653  
 H 4.9362956 -3.3571360 -3.0725851  
 H 4.5070778 -3.0554277 0.5226312  
 H 3.3752385 -4.1190617 -0.3397343  
 H 5.0889616 -4.0538050 -0.8362298  
 H -0.6597388 -5.5518164 1.5781004  
 H 6.5661376 0.9085910 4.0877818  
 H 4.4395385 -1.6202290 -4.7787371

**TS5h** : CMe<sub>3</sub><sup>+</sup> deprotonation of activated **4**  
130

Energy = -6024.059443449

N -1.5142530 -0.0846616 0.8510289  
 N -0.8450574 -1.1963784 0.4154905  
 H -1.1701570 0.2312932 1.7581301  
 C 0.5329617 -1.1737093 0.1095159  
 O 1.1432111 -0.0864553 0.3408786  
 O 0.9701209 -2.2848139 -0.3383397  
 C 2.8560668 -3.4069209 -2.7673514  
 C 1.6473074 -3.6702707 -3.6037889  
 C 4.0119445 -2.7643704 -3.4595138  
 C 2.8716149 -3.7100563 -1.4115760  
 H 0.8896070 -4.2708351 -3.0824414  
 H 1.2074640 -2.6957448 -3.8902395  
 H 1.9380460 -4.1688920 -4.5454423  
 H 4.4335321 -3.5202350 -4.1518909  
 H 3.6802595 -1.9172525 -4.0823854  
 H 4.8057493 -2.4427546 -2.7746489  
 H 3.8118761 -3.6098562 -0.8582131  
 H 2.0491976 -2.7317020 -0.9213055  
 H 2.1776335 -4.4822589 -1.0503384  
 B -2.2615353 0.9779565 -0.0248591  
 C -3.5834461 1.5235738 0.8145120  
 C -1.3232656 2.3498354 -0.2126199  
 C -2.6614273 0.3115773 -1.4885076

C -3.9501686 1.1867936 2.1259676  
 C -4.4174958 2.4779084 0.2094417  
 C -0.7889984 2.9303444 0.9485980  
 C -1.0612348 3.0762289 -1.3821696  
 C -1.6402841 0.0212327 -2.4012962  
 C -3.9433243 0.0211901 -1.9840455  
 C -5.1001415 1.6843456 2.7578259  
 F -3.2250638 0.3280022 2.8821640  
 C -5.5662252 3.0139503 0.8003454  
 F -4.1444192 2.8913436 -1.0504681  
 C 0.0083920 4.0792545 0.9695695  
 F -1.0695937 2.3832569 2.1582957  
 C -0.2967200 4.2517805 -1.4125284  
 F -1.5571728 2.6930829 -2.5826404  
 C -1.8290292 -0.4820457 -3.6888406  
 F -0.3526689 0.2339404 -2.0436858  
 C -4.1953396 -0.4999493 -3.2637901  
 F -5.0526303 0.2113897 -1.2326055  
 C -5.9140401 2.6070748 2.0950334  
 F -5.4270350 1.2698852 3.9961403  
 F -6.3338790 3.9027533 0.1473622  
 C 0.2530954 4.7565287 -0.2308017  
 F 0.5252630 4.5393274 2.1227004  
 F -0.0841787 4.8896022 -2.5778909  
 C -3.1262927 -0.7643446 -4.1239432  
 F -0.7730866 -0.7897060 -4.4700596  
 F -5.4501098 -0.7733323 -3.6524788  
 F -7.0146846 3.0939440 2.6887206  
 F 1.0050426 5.8638336 -0.2474796  
 F -3.3332382 -1.3135771 -5.3287300  
 P -1.4935715 -2.8332208 0.7874325  
 C -1.9320574 -3.6944337 -0.7546315  
 C -3.0623407 -2.5583477 1.6489787  
 C -0.2612292 -3.7754249 1.7127621  
 C -1.4735556 -3.1588082 -1.9718877  
 C -2.7861778 -4.8343833 -0.7407295  
 C -3.4605014 -3.0437045 2.9274954  
 C -3.9758594 -1.8413241 0.8443309  
 C 0.2004200 -4.9937764 1.1697568  
 C 0.2970344 -3.2431164 2.9022977  
 C -1.8720119 -3.7176964 -3.1915249  
 H -0.7975127 -2.3046573 -1.9549429  
 C -3.1561089 -5.3822180 -1.9830550  
 C -3.3173852 -5.4690006 0.5227095  
 C -4.7532288 -2.6911376 3.3644095  
 C -2.6566008 -3.9464772 3.8357375  
 C -5.2571637 -1.5303299 1.3003034  
 H -3.6699195 -1.5294012 -0.1558039  
 C 1.2125594 -5.7090408 1.8133529  
 H -0.2332460 -5.3680280 0.2369601  
 C 1.3155659 -3.9871065 3.5261996  
 C -0.1232637 -1.9166591 3.4843642

C -2.7216017 -4.8301544 -3.1947916  
 H -1.5248561 -3.2794901 -4.1311079  
 H -3.8087807 -6.2617885 -1.9922398  
 H -4.2127604 -4.9336469 0.8852136  
 H -3.6014868 -6.5161643 0.3317837  
 H -2.5768360 -5.4605179 1.3389644  
 C -5.6347396 -1.9344216 2.5860010  
 H -5.0773362 -3.0470798 4.3481992  
 H -3.3427027 -4.4941375 4.5009363  
 H -2.0526609 -4.6818906 3.2843291  
 H -1.9696219 -3.3728689 4.4795009  
 H -5.9352514 -0.9649889 0.6583320  
 C 1.7733516 -5.1974192 2.9946166  
 H 1.5660797 -6.6560785 1.3943223  
 H 1.7699551 -3.5913611 4.4400481  
 H -0.1125102 -1.9554642 4.5859776  
 H 0.5832754 -1.1280603 3.1849248  
 H -1.1289468 -1.5971533 3.1641854  
 H -3.0444070 -5.2739266 -4.1418624  
 H -6.6253585 -1.6820291 2.9766976  
 H 2.5770552 -5.7412409 3.5003060  
 B 2.5992098 0.4485383 0.1710444  
 C 2.5562553 1.2767221 -1.2410866  
 C 2.9441775 1.3797323 1.4755466  
 C 3.7041781 -0.7731026 0.2466458  
 C 2.6765749 2.6631812 -1.4173001  
 C 2.3189788 0.5736190 -2.4256653  
 C 2.1743824 1.5486826 2.6312848  
 C 4.1903076 2.0280583 1.5044067  
 C 3.6774649 -1.6383108 1.3519460  
 C 4.8238921 -0.9269357 -0.5825739  
 C 2.5881356 3.2927641 -2.6692140  
 F 2.8831324 3.4951913 -0.3764211  
 C 2.2133880 1.1426582 -3.6934565  
 F 2.1619652 -0.7770050 -2.3641655  
 C 2.5642913 2.3548486 3.7116257  
 F 0.9905503 0.9153028 2.7872734  
 C 4.6272194 2.8410901 2.5537721  
 F 5.0242284 1.9024676 0.4458249  
 C 4.6461911 -2.6109437 1.6230571  
 F 2.6738055 -1.5284322 2.2508480  
 C 5.8272978 -1.8813131 -0.3519459  
 F 5.0010991 -0.1555705 -1.6731955  
 C 2.3439097 2.5313600 -3.8174973  
 F 2.7278759 4.6200808 -2.7653972  
 F 1.9963507 0.3725190 -4.7759011  
 C 3.8005784 3.0058982 3.6733504  
 F 1.7713860 2.4826545 4.7854062  
 F 5.8199667 3.4534999 2.5038225  
 C 5.7359352 -2.7389473 0.7510393  
 F 4.5458918 -3.4101565 2.6969961  
 F 6.8521158 -2.0068877 -1.2117685

F 2.2460612 3.1189563 -5.0149809  
 F 4.1947002 3.7749997 4.6968994  
 F 6.6783604 -3.6620203 0.9737233

**TS5** : CMe<sub>3</sub><sup>+</sup> elimination of borane-activated **4**  
130

Energy = -6024.051084024

N -1.4255091 -0.1157557 0.8300094  
 N -0.7933022 -1.1892745 0.2552515  
 H -1.0275041 0.1090566 1.7411667  
 C 0.6125324 -1.1836566 -0.0617869  
 O 1.2426381 -0.1430501 0.3668731  
 O 1.0654050 -2.1681513 -0.6712429  
 C 2.4851209 -3.9290689 -2.3755981  
 C 2.3782632 -3.0078860 -3.5189015  
 C 3.6668515 -3.9099741 -1.5022344  
 C 1.3641570 -4.7915910 -2.0461764  
 H 1.7804697 -3.4298236 -4.3414127  
 H 1.8039722 -2.1397786 -3.1179635  
 H 3.3449519 -2.6138647 -3.8591388  
 H 4.5174565 -4.3006336 -2.1017246  
 H 3.9399741 -2.8689013 -1.2571862  
 H 3.5450067 -4.5162244 -0.5943441  
 H 1.6350332 -5.6576152 -1.4268187  
 H 0.8158055 -4.0670433 -1.3751856  
 H 0.6916731 -5.0317405 -2.8811234  
 B -2.2492145 1.0151743 0.1356601  
 C -3.5872909 1.3620255 1.0640292  
 C -1.4076236 2.4580029 0.1591312  
 C -2.6184386 0.5660651 -1.4175235  
 C -3.9077956 0.8113885 2.3136954  
 C -4.4777647 2.3625664 0.6375839  
 C -0.7803829 2.8602291 1.3476025  
 C -1.3463433 3.4059369 -0.8723029  
 C -1.5700447 0.3725032 -2.3253991  
 C -3.8839502 0.3677310 -1.9944126  
 C -5.0605232 1.1485591 3.0395623  
 F -3.1316277 -0.1224291 2.9154821  
 C -5.6341852 2.7423828 1.3261686  
 F -4.2560698 2.9921306 -0.5387353  
 C -0.1300416 4.0858241 1.5198051  
 F -0.8140349 2.0531857 2.4459326  
 C -0.6975834 4.6433232 -0.7554866  
 F -1.9089812 3.1670452 -2.0795929  
 C -1.7155062 0.0200429 -3.6681170  
 F -0.2917403 0.5143115 -1.9091495  
 C -4.0935108 0.0043028 -3.3351182  
 F -5.0200254 0.4865768 -1.2699987  
 C -5.9309330 2.1237360 2.5473043  
 F -5.3345220 0.5296602 4.2030176  
 F -6.4545731 3.6871239 0.8360594  
 C -0.0722190 4.9828920 0.4473901

|   |            |            |            |                                                              |            |            |            |
|---|------------|------------|------------|--------------------------------------------------------------|------------|------------|------------|
| F | 0.4265425  | 4.4165895  | 2.7005716  | C                                                            | 2.7628195  | 0.7322243  | -1.4833965 |
| F | -0.6469120 | 5.4899499  | -1.7974896 | C                                                            | 2.9282793  | 1.5764910  | 1.1422564  |
| C | -2.9976725 | -0.1857808 | -4.1819524 | C                                                            | 3.8596672  | -0.7865022 | 0.5422933  |
| F | -0.6286116 | -0.2179978 | -4.4330086 | C                                                            | 2.0112804  | 1.8360015  | -1.9134404 |
| F | -5.3376716 | -0.1934353 | -3.7976813 | C                                                            | 3.4006262  | 0.0496244  | -2.5245334 |
| F | -7.0358078 | 2.4597816  | 3.2308585  | C                                                            | 2.5593079  | 1.4306720  | 2.4881277  |
| F | 0.5700859  | 6.1532314  | 0.5786193  | C                                                            | 3.5327991  | 2.8062138  | 0.8367179  |
| F | -3.1680617 | -0.5877788 | -5.4489508 | C                                                            | 3.6707916  | -1.9594514 | 1.2813379  |
| P | -1.4672913 | -2.8124415 | 0.4894463  | C                                                            | 5.2078330  | -0.4874727 | 0.2731305  |
| C | -1.8157949 | -3.5572116 | -1.1402649 | C                                                            | 1.8333491  | 2.2093650  | -3.2495059 |
| C | -3.0986293 | -2.6276587 | 1.2665426  | F                                                            | 1.3741913  | 2.5894473  | -1.0047517 |
| C | -0.3465918 | -3.8420184 | 1.4656307  | C                                                            | 3.2634126  | 0.3794575  | -3.8808894 |
| C | -1.3543766 | -2.8708796 | -2.2812082 | F                                                            | 4.2185243  | -1.0136162 | -2.2839634 |
| C | -2.6133330 | -4.7278901 | -1.2776603 | C                                                            | 2.7008811  | 2.4301675  | 3.4568779  |
| C | -3.5632131 | -3.2083712 | 2.4829023  | F                                                            | 2.0516102  | 0.2533683  | 2.9278467  |
| C | -3.9870335 | -1.8961904 | 0.4484132  | C                                                            | 3.6974011  | 3.8389275  | 1.7713522  |
| C | 0.0167494  | -5.1217272 | 1.0001198  | F                                                            | 3.9892769  | 3.0723327  | -0.4055246 |
| C | 0.1401264  | -3.3516659 | 2.7050732  | C                                                            | 4.7117164  | -2.8196176 | 1.6652961  |
| C | -1.6503175 | -3.3338499 | -3.5670335 | F                                                            | 2.4404956  | -2.3491331 | 1.6671667  |
| H | -0.7501712 | -1.9752998 | -2.1457588 | C                                                            | 6.2826632  | -1.3065366 | 0.6377206  |
| C | -2.8682045 | -5.1884831 | -2.5844487 | F                                                            | 5.5164702  | 0.6452645  | -0.3903080 |
| C | -3.2395976 | -5.4604083 | -0.1143536 | C                                                            | 2.4568974  | 1.4596561  | -4.2529138 |
| C | -4.9005477 | -2.9442502 | 2.8415372  | F                                                            | 1.0502036  | 3.2483015  | -3.5685771 |
| C | -2.7863457 | -4.1133165 | 3.4120364  | F                                                            | 3.8861144  | -0.3564644 | -4.8246254 |
| C | -5.3114339 | -1.6712998 | 0.8263571  | C                                                            | 3.2848595  | 3.6478290  | 3.0937899  |
| H | -3.6248456 | -1.5040378 | -0.5041070 | F                                                            | 2.3023567  | 2.2245194  | 4.7223306  |
| C | 0.8798271  | -5.9268595 | 1.7485560  | F                                                            | 4.2600071  | 5.0029216  | 1.4092607  |
| H | -0.3889838 | -5.4899042 | 0.0540229  | C                                                            | 6.0307500  | -2.4940541 | 1.3399248  |
| C | 0.9995685  | -4.1876200 | 3.4394958  | F                                                            | 4.4391861  | -3.9609808 | 2.3269385  |
| C | -0.1992596 | -1.9781810 | 3.2252563  | F                                                            | 7.5436710  | -0.9691361 | 0.3280553  |
| C | -2.4031272 | -4.5060487 | -3.7164317 | F                                                            | 2.2942002  | 1.7720202  | -5.5439816 |
| H | -1.3013693 | -2.7747673 | -4.4401578 | F                                                            | 3.4329766  | 4.6241854  | 3.9981183  |
| H | -3.4665262 | -6.0973155 | -2.7101625 | F                                                            | 7.0404790  | -3.3013893 | 1.6939424  |
| H | -4.2060169 | -4.9946113 | 0.1505992  | <b>TS6 : CO<sub>2</sub> release via 1,4-H-shift within F</b> |            |            |            |
| H | -3.4313067 | -6.5124284 | -0.3801913 | 84                                                           |            |            |            |
| H | -2.6133563 | -5.4427050 | 0.7907015  | Energy = -3659.922293344                                     |            |            |            |
| C | -5.7629164 | -2.1826925 | 2.0476298  | N                                                            | 0.0012623  | 1.1480150  | 0.3576331  |
| H | -5.2730813 | -3.3711744 | 3.7785979  | N                                                            | 1.2707729  | 1.1558651  | -0.2935475 |
| H | -3.4888002 | -4.6168740 | 4.0942204  | H                                                            | 0.1150933  | 1.2089643  | 1.3744621  |
| H | -2.2134190 | -4.8869957 | 2.8778925  | C                                                            | 1.4510403  | 2.4498047  | -0.9984797 |
| H | -2.0726202 | -3.5501174 | 4.0345335  | O                                                            | 0.4263189  | 3.2003773  | -0.7957395 |
| H | -5.9669675 | -1.0895498 | 0.1761221  | O                                                            | 2.4880719  | 2.6238406  | -1.6233006 |
| C | 1.3756858  | -5.4514168 | 2.9718909  | H                                                            | -0.1563288 | 2.3766399  | -0.1134077 |
| H | 1.1564687  | -6.9210020 | 1.3839647  | B                                                            | -1.2300382 | 0.1821325  | -0.0763814 |
| H | 1.3927249  | -3.8239746 | 4.3943942  | C                                                            | -1.7755849 | -0.6760323 | 1.2243056  |
| H | -0.0737413 | -1.9370612 | 4.3187982  | C                                                            | -2.4860424 | 1.2032613  | -0.4371967 |
| H | 0.4837280  | -1.2281953 | 2.7936141  | C                                                            | -0.7582006 | -0.7264659 | -1.3600373 |
| H | -1.2310388 | -1.6689980 | 2.9861951  | C                                                            | -1.3487499 | -0.5968183 | 2.5554178  |
| H | -2.6399206 | -4.8864265 | -4.7152100 | C                                                            | -2.8808619 | -1.5244619 | 1.0317423  |
| H | -6.7913455 | -2.0046970 | 2.3768793  | C                                                            | -2.7988254 | 2.2273050  | 0.4702036  |
| H | 2.0574152  | -6.0688630 | 3.5650100  | C                                                            | -3.3613732 | 1.1059295  | -1.5292316 |
| B | 2.7141406  | 0.3131234  | 0.1072462  |                                                              |            |            |            |

|   |            |            |            |            |                                 |            |            |
|---|------------|------------|------------|------------|---------------------------------|------------|------------|
| C | -0.4095567 | -0.0803356 | -2.5570075 | H          | 4.2586154                       | -0.1759019 | 4.4198581  |
| C | -0.6450684 | -2.1243834 | -1.4196818 | H          | 4.6758100                       | 0.3992575  | 2.7829202  |
| C | -1.8980329 | -1.3457370 | 3.6046726  | C          | 5.8430062                       | 3.6255670  | 1.2834961  |
| F | -0.3178159 | 0.2181728  | 2.9289393  | H          | 4.3098442                       | 4.5421255  | 2.5047496  |
| C | -3.4730918 | -2.2903122 | 2.0410703  | H          | 2.2326782                       | 3.5285418  | 3.0637922  |
| F | -3.4076391 | -1.6514540 | -0.2043687 | H          | 1.5030788                       | 3.4196969  | 1.4480291  |
| C | -3.8626351 | 3.1229317  | 0.3186216  | H          | 1.7378393                       | 1.9433388  | 2.4277547  |
| F | -2.0370202 | 2.3860041  | 1.5870769  | H          | 7.1658174                       | 2.5090903  | -0.0302689 |
| C | -4.4425604 | 1.9778387  | -1.7278514 | C          | 4.2014697                       | -2.2132832 | -3.2499086 |
| F | -3.2090031 | 0.1476072  | -2.4663190 | H          | 2.9668455                       | -0.9168953 | -4.4834565 |
| C | 0.0248771  | -0.7340161 | -3.7124652 | H          | 5.3708320                       | -3.3026232 | -1.7920838 |
| F | -0.4834656 | 1.2661696  | -2.6345826 | H          | 5.0605054                       | -1.1296635 | 1.1057317  |
| C | -0.2060434 | -2.8303878 | -2.5505796 | H          | 4.1298143                       | -2.6451329 | 1.1001509  |
| F | -0.9367628 | -2.9042505 | -0.3502649 | H          | 5.7730655                       | -2.6060651 | 0.4080603  |
| C | -2.9720692 | -2.2017865 | 3.3470778  | H          | 1.0361024                       | -3.4092550 | 4.1356219  |
| F | -1.3878035 | -1.2558861 | 4.8441319  | H          | 6.5897697                       | 4.3873317  | 1.5291310  |
| F | -4.5106861 | -3.0975034 | 1.7761741  | H          | 4.5258387                       | -2.8445849 | -4.0832769 |
| C | -4.6971081 | 2.9919969  | -0.7979764 |            |                                 |            |            |
| F | -4.0946656 | 4.0843484  | 1.2255955  | <b>TS8</b> | : unlikely 1,2-H-shift within G |            |            |
| F | -5.2405784 | 1.8418013  | -2.7980337 | 81         |                                 |            |            |
| C | 0.1471423  | -2.1269185 | -3.7042759 | Energy =   | -3471.368356407                 |            |            |
| F | 0.4062569  | -0.0354988 | -4.7949023 | N          | -0.0747817                      | 1.1162662  | 0.2846770  |
| F | -0.0921560 | -4.1666962 | -2.5158560 | N          | 1.2258477                       | 1.0847289  | -0.5565309 |
| F | -3.5141347 | -2.9277897 | 4.3334831  | H          | 0.1431196                       | 1.2428422  | 1.2745173  |
| F | -5.7268226 | 3.8299709  | -0.9750519 | H          | 0.4583692                       | 2.0029496  | -0.4454138 |
| F | 0.6213610  | -2.7701570 | -4.7785548 | B          | -1.2549018                      | 0.0969672  | -0.0495784 |
| P | 2.7214340  | 0.4067472  | 0.2470774  | C          | -1.6105476                      | -0.8513543 | 1.2564065  |
| C | 2.2753901  | -0.6976587 | 1.6185978  | C          | -2.6062533                      | 1.0250964  | -0.2762254 |
| C | 3.9186292  | 1.6904141  | 0.6827872  | C          | -0.7926551                      | -0.7230351 | -1.3934022 |
| C | 3.3666841  | -0.6341294 | -1.0942746 | C          | -1.0771005                      | -0.7671758 | 2.5479522  |
| C | 1.3885100  | -1.7150176 | 1.2032542  | C          | -2.6310686                      | -1.8085864 | 1.1203883  |
| C | 2.7888316  | -0.6907875 | 2.9471662  | C          | -2.9005014                      | 2.0193305  | 0.6681724  |
| C | 3.5654473  | 2.7584556  | 1.5489034  | C          | -3.5535203                      | 0.8874470  | -1.3004665 |
| C | 5.2021195  | 1.6129607  | 0.1078676  | C          | -0.5377163                      | 0.0137778  | -2.5611082 |
| C | 2.9187902  | -0.3494911 | -2.3997063 | C          | -0.4863921                      | -2.0853334 | -1.4965681 |
| C | 4.2775991  | -1.7001569 | -0.8501753 | C          | -1.4485325                      | -1.6074813 | 3.6066372  |
| C | 0.9423602  | -2.6972534 | 2.0884221  | F          | -0.1164870                      | 0.1474335  | 2.8676329  |
| H | 1.0554247  | -1.7326978 | 0.1638746  | C          | -3.0450725                      | -2.6692957 | 2.1420855  |
| C | 2.2985926  | -1.6829313 | 3.8198057  | F          | -3.2469328                      | -1.9513145 | -0.0726350 |
| C | 3.8458190  | 0.2439595  | 3.4894706  | C          | -4.0264900                      | 2.8485881  | 0.6117951  |
| C | 4.5569526  | 3.7122034  | 1.8341297  | F          | -2.0715479                      | 2.2058166  | 1.7294622  |
| C | 2.1876053  | 2.9134759  | 2.1513672  | C          | -4.6982727                      | 1.6930089  | -1.4014714 |
| C | 6.1689241  | 2.5751601  | 0.4152367  | F          | -3.4083261                      | -0.0451007 | -2.2649005 |
| H | 5.4363610  | 0.8058490  | -0.5927947 | C          | -0.0160951                      | -0.5315502 | -3.7355685 |
| C | 3.3325475  | -1.1391690 | -3.4771923 | F          | -0.7643415                      | 1.3480497  | -2.5733915 |
| H | 2.2630706  | 0.5061331  | -2.5657036 | C          | 0.0364678                       | -2.6847494 | -2.6548607 |
| C | 4.6722189  | -2.4751233 | -1.9563687 | F          | -0.6385161                      | -2.9276724 | -0.4443200 |
| C | 4.8380724  | -2.0331868 | 0.5139200  | C          | -2.4422564                      | -2.5686218 | 3.4034055  |
| C | 1.3852208  | -2.6625612 | 3.4158358  | F          | -0.8468993                      | -1.5019457 | 4.8041759  |
| H | 0.2481237  | -3.4640356 | 1.7380979  | F          | -4.0084181                      | -3.5800683 | 1.9327772  |
| H | 2.6701442  | -1.6899882 | 4.8498206  | C          | -4.9366086                      | 2.6805942  | -0.4392234 |
| H | 3.4354847  | 1.2379108  | 3.7328012  | F          | -4.2462512                      | 3.7863848  | 1.5489220  |

F -5.5681718 1.5237383 -2.4108021  
 C 0.2865892 -1.8974665 -3.7803726  
 F 0.2793376 0.2515413 -4.7901869  
 F 0.3294648 -3.9953766 -2.6710451  
 F -2.8139859 -3.3833015 4.4010105  
 F -6.0256019 3.4586002 -0.5215320  
 F 0.8334710 -2.4312839 -4.8823969  
 P 2.7205531 0.7647116 0.0984169  
 C 2.5547759 -0.4333797 1.4581961  
 C 3.6459330 2.2769183 0.5259001  
 C 3.5934236 -0.0506027 -1.2835665  
 C 1.7629966 -1.5327862 1.0573256  
 C 3.1046250 -0.3791485 2.7672498  
 C 3.1014762 3.2488501 1.4085491  
 C 4.8922032 2.4987357 -0.0962297  
 C 3.0159736 0.1140930 -2.5593171  
 C 4.7453793 -0.8620341 -1.1077735  
 C 1.4719132 -2.5729537 1.9418084  
 H 1.3702942 -1.5571800 0.0373103  
 C 2.7771724 -1.4357596 3.6402865  
 C 4.0225860 0.7069142 3.2804689  
 C 3.8610261 4.4043413 1.6614303  
 C 1.7494123 3.0929144 2.0636721  
 C 5.6265642 3.6601205 0.1709326  
 H 5.2845659 1.7588842 -0.8003831  
 C 3.5551213 -0.5367914 -3.6733598  
 H 2.1275534 0.7416928 -2.6586073  
 C 5.2675031 -1.5025132 -2.2484124  
 C 5.4075476 -1.0793042 0.2329662  
 C 1.9700895 -2.5106170 3.2493823  
 H 0.8471943 -3.4055582 1.6092524  
 H 3.1822950 -1.4118458 4.6577694  
 H 3.4600760 1.6042183 3.5919914  
 H 4.5708366 0.3424948 4.1635899  
 H 4.7568078 1.0321266 2.5273793  
 C 5.1093339 4.6125311 1.0580673  
 H 3.4601599 5.1574044 2.3487325  
 H 1.6661310 3.7491847 2.9440731  
 H 0.9325903 3.3697060 1.3730114  
 H 1.5658644 2.0581532 2.4027825  
 H 6.5942030 3.8179553 -0.3149111  
 C 4.6822944 -1.3538356 -3.5127529  
 H 3.0821827 -0.4167857 -4.6525625  
 H 6.1528563 -2.1375985 -2.1333856  
 H 5.4526507 -0.1516905 0.8283293  
 H 4.8551543 -1.8252944 0.8318709  
 H 6.4375832 -1.4464554 0.0986573  
 H 1.7384268 -3.3037321 3.9670965  
 H 5.6736707 5.5243787 1.2784170  
 H 5.1106739 -1.8773877 -4.3736184

**TS7** : carboxylic acid F catalyzed G to 5

165

Energy = -7131.419023839

N -2.6792106 0.4137970 0.7417345  
 N -2.1662788 -0.9248596 0.8813915  
 H -3.0944252 0.7067248 1.6373695  
 H -1.7560094 0.9440609 0.7368504  
 B -3.6296746 1.1191133 -0.4763066  
 C -2.9874827 2.6347777 -0.5557766  
 C -3.4218898 0.2492665 -1.8343901  
 C -5.1698358 1.1390811 0.0882120  
 C -2.7229968 3.3793595 0.6042198  
 C -2.6845953 3.3007459 -1.7533285  
 C -2.1098103 -0.0140113 -2.2495452  
 C -4.4195804 -0.2989560 -2.6518760  
 C -5.8104746 -0.0853061 0.2997816  
 C -5.9573010 2.2577985 0.4035739  
 C -2.2010137 4.6740688 0.6093116  
 F -3.0316747 2.8516539 1.8239665  
 C -2.1501183 4.5970052 -1.7994079  
 F -2.9140942 2.7252054 -2.9499583  
 C -1.7746511 -0.7990641 -3.3556276  
 F -1.1036598 0.5358155 -1.5387296  
 C -4.1388335 -1.1174622 -3.7542911  
 F -5.7311729 -0.0712307 -2.4172436  
 C -7.0962030 -0.2525616 0.8119368  
 F -5.1360675 -1.2132372 -0.0364411  
 C -7.2588353 2.1538068 0.9257286  
 F -5.5153129 3.5149095 0.2099375  
 C -1.9016629 5.2880303 -0.6109111  
 F -1.9792993 5.3370080 1.7600807  
 F -1.8452305 5.1663489 -2.9759134  
 C -2.8103827 -1.3668312 -4.1065934  
 F -0.5039751 -1.0780343 -3.6732203  
 F -5.1348711 -1.6742758 -4.4620298  
 C -7.8298772 0.8944319 1.1410708  
 F -7.6177129 -1.4732575 1.0030776  
 F -7.9596504 3.2574030 1.2191384  
 F -1.3805149 6.5202508 -0.6375230  
 F -2.5263788 -2.1745215 -5.1363828  
 F -9.0627622 0.7874625 1.6482160  
 P -2.8471865 -2.4161760 1.0445554  
 C -4.2326305 -2.5562619 2.2358884  
 C -1.4948478 -3.3149939 1.8953286  
 C -3.0412799 -3.2426802 -0.5860104  
 C -4.7342224 -1.3705966 2.8101379  
 C -4.7057048 -3.8171817 2.6881724  
 C -0.9716600 -2.8259798 3.1279577  
 C -1.0397743 -4.5441544 1.3762992  
 C -1.8031590 -3.2132034 -1.2823596  
 C -4.1641065 -3.8837661 -1.1701813  
 C -5.7295655 -1.4030435 3.7900515  
 H -4.3517749 -0.4022795 2.4857400



|   |            |            |            |   |            |            |            |
|---|------------|------------|------------|---|------------|------------|------------|
| C | -5.7164655 | -3.8219919 | 3.6689939  | C | 2.6955150  | -4.5388945 | 0.4194892  |
| C | -4.1641910 | -5.1405402 | 2.2025951  | F | 3.5599767  | -2.8103572 | 1.7236498  |
| C | 0.0092735  | -3.6044665 | 3.7712707  | C | 2.1654408  | -4.1656164 | -1.8978391 |
| C | -1.3910475 | -1.5328033 | 3.7863579  | F | 2.6925262  | -2.1569993 | -2.9356777 |
| C | -0.0729380 | -5.2980973 | 2.0451067  | C | 2.0321010  | 1.3061406  | -3.1877891 |
| H | -1.4464694 | -4.9227352 | 0.4358174  | F | 1.2910343  | -0.2930836 | -1.6579159 |
| C | -1.6372756 | -3.8723583 | -2.4998881 | C | 4.3517201  | 1.9557173  | -3.2019559 |
| H | -0.9504752 | -2.6740038 | -0.8539632 | F | 5.8704454  | 1.0122776  | -1.7243899 |
| C | -3.9699715 | -4.5184406 | -2.4186568 | C | 8.1345923  | -1.6274151 | 0.4700862  |
| C | -5.5634155 | -3.9254140 | -0.5974531 | F | 7.9255894  | -0.8132538 | 2.6908105  |
| C | -6.2313307 | -2.6399591 | 4.2129236  | F | 8.2598943  | -2.4200223 | -1.7663910 |
| H | -6.1124118 | -0.4685997 | 4.2106244  | C | 2.1728399  | -5.0143677 | -0.7874379 |
| H | -6.1037314 | -4.7874912 | 4.0118204  | F | 2.7963756  | -5.3627498 | 1.4804577  |
| H | -3.2998379 | -5.4475065 | 2.8188521  | F | 1.6808276  | -4.6116224 | -3.0756109 |
| H | -4.9350567 | -5.9231184 | 2.2851204  | C | 3.0581351  | 2.0992476  | -3.7102498 |
| H | -3.8197227 | -5.1052445 | 1.1584056  | F | 0.7736823  | 1.4737273  | -3.6349721 |
| C | 0.4588958  | -4.8212274 | 3.2486479  | F | 5.3524193  | 2.7076359  | -3.6900271 |
| H | 0.4280984  | -3.2353903 | 4.7138820  | F | 9.4419932  | -1.8678693 | 0.6563269  |
| H | -2.4852256 | -1.4606101 | 3.8911123  | F | 1.7043619  | -6.2716328 | -0.8786525 |
| H | -0.9504938 | -1.4679651 | 4.7934019  | F | 2.7958066  | 2.9969991  | -4.6707562 |
| H | -1.0590626 | -0.6561454 | 3.2080295  | P | 2.1802490  | 2.3397470  | 1.6883333  |
| H | 0.2757813  | -6.2387868 | 1.6126817  | C | 3.9408432  | 2.4815974  | 2.0940075  |
| C | -2.7339608 | -4.5378081 | -3.0683088 | C | 1.0828877  | 2.4321541  | 3.1287294  |
| H | -0.6667594 | -3.8488320 | -3.0014205 | C | 1.8230929  | 3.6412419  | 0.4681378  |
| H | -4.8299421 | -5.0120669 | -2.8845014 | C | 4.7534781  | 2.3403286  | 0.9473432  |
| H | -5.9390511 | -4.9627159 | -0.5846846 | C | 4.5302911  | 2.7297267  | 3.3645030  |
| H | -5.6432069 | -3.5053868 | 0.4101922  | C | 1.0729364  | 1.3886657  | 4.0908447  |
| H | -6.2356853 | -3.3375213 | -1.2463948 | C | 0.1627757  | 3.4943572  | 3.2010888  |
| H | -7.0195963 | -2.6861903 | 4.9705567  | C | 1.2208616  | 3.2558189  | -0.7452478 |
| H | 1.2301914  | -5.3902548 | 3.7753238  | C | 2.2162896  | 4.9911596  | 0.6846403  |
| H | -2.6292258 | -5.0525682 | -4.0280519 | C | 6.1453844  | 2.3877676  | 1.0345969  |
| N | 3.0729145  | -0.1457472 | 0.9522535  | H | 4.2768373  | 2.1936853  | -0.0247106 |
| N | 2.0179339  | 0.7295338  | 0.9581831  | C | 5.9385930  | 2.7569411  | 3.4196205  |
| H | 3.0898333  | -0.7135434 | 1.7990708  | C | 3.7831390  | 3.0052182  | 4.6504558  |
| C | 0.6563200  | 0.3489041  | 0.9322513  | C | 0.1485011  | 1.4943012  | 5.1461408  |
| O | 0.3637827  | -0.8941350 | 0.8985420  | C | 1.9691821  | 0.1732872  | 4.0024207  |
| O | -0.1576779 | 1.3095761  | 0.9909102  | C | -0.7580921 | 3.5620506  | 4.2503865  |
| H | -0.8750372 | -0.9488922 | 0.8766716  | H | 0.1500046  | 4.2546504  | 2.4161046  |
| B | 3.7562258  | -0.7815146 | -0.2945592 | C | 1.0196682  | 4.1891163  | -1.7666053 |
| C | 5.3478523  | -1.0753616 | 0.0687361  | H | 0.8944574  | 2.2263305  | -0.8797377 |
| C | 3.1233593  | -2.3084358 | -0.5766352 | C | 1.9748097  | 5.9118188  | -0.3521803 |
| C | 3.5920214  | 0.2462697  | -1.5762160 | C | 2.8874444  | 5.4687798  | 1.9509391  |
| C | 5.9915120  | -0.8556898 | 1.2947592  | C | 6.7399479  | 2.5731840  | 2.2884261  |
| C | 6.1670877  | -1.6377532 | -0.9221743 | H | 6.7470886  | 2.2633412  | 0.1322393  |
| C | 3.1078127  | -3.2057101 | 0.5022600  | H | 6.4130562  | 2.9422220  | 4.3894145  |
| C | 2.6648261  | -2.8587993 | -1.7823690 | H | 3.4373335  | 2.0750458  | 5.1332724  |
| C | 2.3228042  | 0.4217641  | -2.1442210 | H | 4.4552876  | 3.5122224  | 5.3614722  |
| C | 4.5873131  | 1.0460267  | -2.1587427 | H | 2.8963794  | 3.6399895  | 4.5004639  |
| C | 7.3588357  | -1.0934268 | 1.5018393  | C | -0.7556318 | 2.5616608  | 5.2323274  |
| F | 5.3365768  | -0.3840820 | 2.3826613  | H | 0.1362767  | 0.7121095  | 5.9130349  |
| C | 7.5297850  | -1.9060720 | -0.7624104 | H | 2.1157034  | -0.2709535 | 5.0001391  |
| F | 5.6429025  | -1.8987311 | -2.1431541 | H | 1.5127101  | -0.6042606 | 3.3614165  |

|   |            |           |            |   |            |           |            |
|---|------------|-----------|------------|---|------------|-----------|------------|
| H | 2.9630232  | 0.4017886 | 3.5811318  | H | 3.9708851  | 5.2584501 | 1.9249113  |
| H | -1.4785151 | 4.3834832 | 4.2864984  | H | 2.7547315  | 6.5552788 | 2.0684450  |
| C | 1.3988011  | 5.5221206 | -1.5677880 | H | 7.8300296  | 2.5925912 | 2.3856857  |
| H | 0.5628849  | 3.8712980 | -2.7071056 | H | -1.4661782 | 2.6050116 | 6.0642678  |
| H | 2.2541777  | 6.9594494 | -0.1970615 | H | 1.2290260  | 6.2646912 | -2.3534664 |
| H | 2.4812046  | 4.9786493 | 2.8504985  |   |            |           |            |
